# Supplementary material for: A Meta-Analysis of Head-to-Head Comparisons of Second-Generation Antipsychotics in the Treatment of Schizophrenia
Source: Atypon-hosted journal article supplement (doi:10.1176/appi.ajp.2008.08030368), 2008-11-18
Supplement: ajp_166_02_0152_01.pdf [file ajp_166_02_0152_01.pdf]

**Data Supplement for Leucht et al., “A Meta-Analysis of Head-to-Head Comparisons of Second-Generation Antipsychotics in the Treatment of Schizophrenia,” American Journal of Psychiatry (doi: 10.1176/appi.ajp.2008.08030368)**

**Glossary of meta-analytic terms:**

In this glossary we can only briefly describe some of the statistical terms used in the method section. The idea is to give some information to those readers who are not familiar with meta-analysis. For a full description of the formulas involved and for alternative methods the interested reader is directed to meta-analytic textbooks such as the Cochrane Handbook for Reviewers (1) or others (2,3). The following terms are explained in the sequence in which they occur in the manuscript.

Systematic review: In contrast to conventional narrative reviews where in the worst case an expert subjectively summarizes the literature he believes to be the most important, systematic reviews use explicit methods in a predefined way to avoid bias by changing the method later to make the results come out better. The search terms of the literature search are predefined and there are different sources for the search (electronic databases, pharmaceutical companies, reference lists of identified studies, authors of identified studies). Inclusion and exclusion criteria of the studies to be included are predefined. The search process is described in the manuscript. For quality assurance all important steps of the review process (study selection, data extraction, data entering) are undertaken by at least two reviewers (in our case even three). Usually meta-analysis (see below) is used to combine the results of the single studies and to obtain quantitative measures of effect.

The Cochrane Collaboration: A not-for-profit organisation with the aim to produce, disseminate and maintain systematic reviews of health care interventions ([www.cochrane.org](http://www.cochrane.org)). The Cochrane Schizophrenia Group (4) supported the conduct of our review.

Cochrane Collaboration quality criteria:

It has been shown that there is a strong relationship between allocation concealment and direction of effect (5). Therefore, the method of allocation concealment is a crucial characteristic of trial quality. Following the rules of the Cochrane Schizophrenia Group (4) we only included studies which met quality criteria A or B according to the Cochrane handbook (1). The categories are defined below:

A. Low risk of bias (adequate allocation concealment, e.g. serially numbered, opaque, sealed envelopes; numbered or coded bottles or containers)

B. Moderate risk of bias (some doubt about the results, primarily studies stated to be randomized without further details)

C. High risk of bias (inadequate allocation concealment; e.g. alternate allocation).

More discussion on quality criteria can be found in the Cochrane handbook (1).

Jadad scale: The Jadad scale is probably the most widely used scale to assess the quality of randomized controlled trials (6). The scale includes three items that are directly related to bias reduction: randomization; blinding; description of withdrawals and drop outs. The score goes from 0 to 5. A study can be judged as having poor quality if it is awarded 2 points or less.

For the purpose of the current review we did not use the Jadad scale for including or excluding studies, but rather we used it to address study quality further by meta-regression (see below) and a sensitivity analysis (see below) excluding studies with a score of 2 or less. It should be noted, however, that all studies included were on the high quality end in any case (randomized, at least rater-blinded studies). Therefore, we could only examine good versus very good study quality.

Meta-analysis: Meta-analysis is a statistical technique to combine the results of a number of studies on the same question.

Effect size: An effect size is a statistical measure of the *magnitude* of a treatment effect (in contrast to the p-value which is an indicator of *probability*). There are effect size measures for dichotomous data or for continuous data (see below).

Mean difference and weighted mean difference: The mean difference is an effect size measure for continuous variables. Please note that the term “mean difference” is potentially confusing, because it is actually a “difference in means”. It is calculated as the mean in the comparison group minus the mean in the control group. For example, if the mean change from baseline to endpoint of the PANSS total score induced by antipsychotic A were -20, and that of antipsychotic B were -15, the mean difference would be -5 (calculated as  $-20 - (-15) = -5$ ). When the mean differences of the single studies are combined in a meta-analysis, the results are usually weighted by the size or precision of the single studies. Therefore, the summary statistic is called “weighted mean difference”.

Hedges’s g: Often different scales are used to measure similar concepts, for example here the PANSS total score and the BPRS total score. A mean difference based on the PANSS (30 items, total score goes from 30 to 210) does obviously not mean the same as a mean difference based on the BPRS (18 items, total score goes from 18 to 126). Therefore, standardized mean differences (SMD) rather than mean differences need to be calculated to allow for meta-analytic combination. This standardization is generally achieved by dividing the mean difference by the pooled standard deviation of both groups according to the general formula:  $SMD = (\text{mean group A} - \text{mean group B}) / \text{pooled standard deviation}$ . Various modifications of this general formula exist (e.g. Cohen’s d, Hedges’s d, Hedges’s g etc). Hedges’s adjusted g is the formula used in this review and by the Cochrane Collaboration (1). It includes a correction factor for very small sample sizes (below 10 participants); in larger sample sizes the results are unaffected. When different studies are pooled they are again weighted according to a measure related to their sample size. The disadvantage of the standardized mean difference is that it does not express the results in the original units, but rather standard deviation units, the interpretation of which is less

intuitive. The description by Cohen is conventionally used for the interpretation of a standardized mean difference (e.g. Hedges's  $g$ ). He said that an SMD of 0.20 is small, 0.50 is medium, and 0.80 is large (7). Nevertheless, this is no more than a rule of thumb and the interpretation can be different according to the situation.

#### Relative risk, risk difference and number-needed-to-treat (NNT):

The relative risk and the risk difference are effect size measures for dichotomous (yes/no) outcomes; in the current review, dropout due to inefficacy of treatment.

The risk difference is in a way the most straightforward method. It is the risk of one group minus the risk in the other group. For example, if 10% of the participants in the intervention group and 20% in the control group dropped out, then the risk difference is:

$$10\% - 20\% = |-10\%| \text{ (or expressed in decimals } 0.10 - 0.20 = |-0.10|)$$

The risk ratio uses the same numbers but divides rather than subtracts the risks.  $10\%/20\% = 50\%$  (or expressed in decimals  $0.10/0.20 = 0.50$ ). While risk differences may be more easily interpreted by clinicians, the advantage of the risk ratio is that in meta-analyses it accounts better for differences in baseline risk, e.g. if studies with higher and lower dropout rates are combined.

The number-needed-to-treat is the number of patients that must be treated with the new intervention to avoid one poor outcome. It is usually calculated as the inverse of the risk difference. In the example above, the risk difference in dropouts was 10%, thus  $NNT = 1/0.1 = 10$ . Ten patients would have to be treated with the intervention to avoid one dropout.

#### Fixed-effects versus random-effects model:

There are two general statistical models to combine different studies in a meta-analysis. Fixed-effects models assume that each study estimates exactly the same treatment effect, while random-effects models assume that the studies estimate treatment effects that follow a distribution across studies. There are arguments for and against both models. We chose a priori a random-effects model as the primary measure, but a fixed-effects model did not yield substantially different results.

#### Homogeneity test:

It is important to assess to what extent the results of the individual studies are consistent or differ. This assessment was performed by a chi-squared test of homogeneity. It examines whether observed differences in results are compatible with chance alone. As the test has low power in meta-analyses with few studies an alpha level of  $p=0.1$  instead of 0.05 was used to indicate significant heterogeneity.

#### Meta-regression:

Meta-regression examines whether the effect sizes of the single studies are influenced by specific characteristics ('moderators') of the single studies. Meta-regression is in essence similar to simple regressions in which an outcome variable is predicted by one or several explanatory variables. In meta-analysis, however, the moderator variable is a characteristic of the individual

studies, not of the individual patients. This may markedly reduce the likelihood of identifying the effect of certain moderators. The moderator variable is often only the mean intensity of a moderator variable in a given study. There may be only modest differences between the mean intensity from study to study, but major differences in the individual patient outcome in each study. Since the individual data is not captured and the moderators reflect on the study level only, meta-regression can be insensitive to these effects. A further important difference compared to simple regressions is that in meta-regressions the individual studies are weighted by the precision of their original effect estimate.

#### Sensitivity analysis:

Sensitivity analyses are made to examine the robustness of results if some key decisions were changed. For example, we had a priori decided to include single-blind and double-blind studies. In a sensitivity analysis, we excluded the single-blind studies to examine whether including only double-blind studies would the results still be the same. Or in the primary analysis we included studies irrespective of their origin, but we examined in a sensitivity analysis whether excluding studies from China made a difference. Sensitivity analysis evaluates the effect of assumptions by doing separate analyses omitting studies which do not meet a certain criteria or adding studies that were excluded by a certain criteria. If the pattern of effect sizes are similar in different sensitivity analyses, then there is evidence that the findings are not dependent on a single assumption. If a sensitivity analysis eliminates studies, the power of detecting statistically significant differences is less. Attention should therefore also be directed to the pattern of effect sizes.

#### Publication bias:

Studies that did not show the desired results are less likely to be published, for example because a pharmaceutical sponsor is understandingly not interested in such a publication. In addition, journal editors may not be as interested in negative studies as in positive studies. Nevertheless, if only the positive studies are included in a review, the overall result must be too positive. Publication bias has also been called the ‘file-drawer problem’ in the sense that negative studies are put away in the file-drawer and never published. In this review two methods were applied to detect a potential publication bias, funnel-plots and fail-safe calculations (see below).

#### Funnel-plot:

The funnel-plot method is a graphical method based on symmetry. The effect sizes of the single studies are plotted on the x-axis against some measure related to each study’s sample size on the y-axis. Large studies have a good precision and will present themselves on top close to the mean effect size while the smaller the studies get, the more they should scatter around the mean effect size. If all studies have been published, there should be a symmetrical figure resembling an inverted funnel. Egger et al. have developed a statistical test to assess funnel-plot asymmetry (8). If the funnel-plot is asymmetrical, it is possible that some unpublished studies exist (for illustration see the figure below). An asymmetrical funnel-plot is, however, not a proof for publication bias, because other reasons can have caused the asymmetry. Furthermore, if the number of studies is small the method’s power is low.

**Figure a:** Hypothetical funnel-plot not indicating potential publication bias

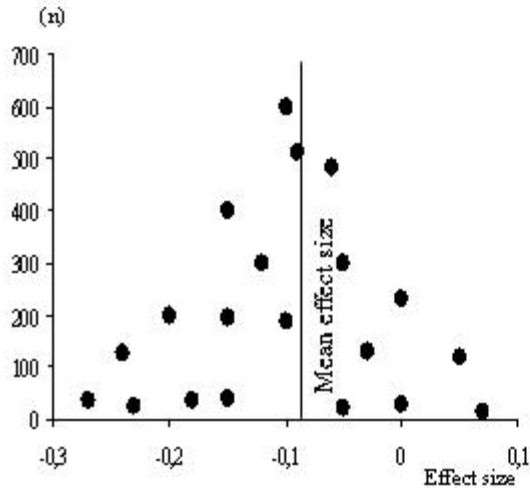

The effect sizes of the single studies were plotted on the x-axis, the studies' sample sizes on the y-axis. If all studies have been published a symmetrical figure resembling an inverted funnel results. Negative effect sizes reflect a superiority of the intervention group.

**Figure b:** Hypothetical funnel-plot indicating potential publication bias

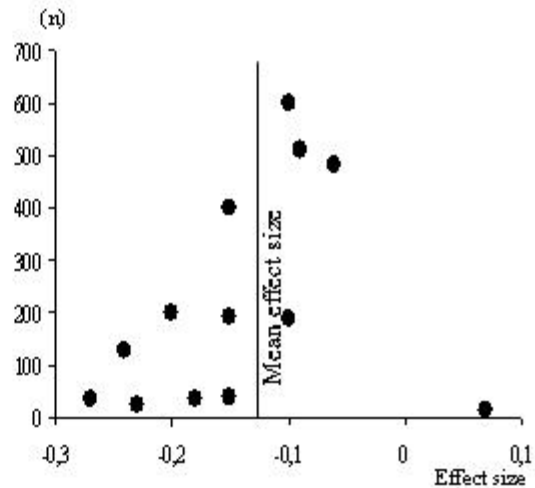

Here the funnel-plot is asymmetrical, because studies in the lower right hand corner are missing. This suggests a relevant publication bias in the sense that smaller studies with results in favour of the control group have not been published.

Fail-safe calculations:

The “fail-safe calculation” by Orwin (9) estimates how many unidentified studies would have to exist to reverse statistical significance ( $p > 0.05$ ). If this number is so high that it is unlikely that so many unpublished studies exist, the results can be considered to be valid.

## Supplemental Material I: Sensitivity Analyses

We performed a sensitivity analysis on pharmaceutical sponsorship and present it in detail below (supplemental Table I). It was especially important because we had previously shown that conclusions in abstracts systematically supported the sponsoring pharmaceutical company (10). The results do not suggest that the sponsor had a strong impact on the results. Only olanzapine was no longer superior to risperidone when studies sponsored by olanzapine's manufacturer were removed. But when studies sponsored by risperidone's manufacturer were removed as well, and only neutrally sponsored studies remained, olanzapine was again superior.

**Supplemental Table I:** sensitivity analyses excluding studies sponsored by the respective pharmaceutical companies – PANSS total score (the antipsychotic of the pharmaceutical sponsor which was excluded from the analysis is highlighted in **bold face**)

| Comparison                             | Results: The results that, in contrast to the primary outcome, did or did not show a significant difference between groups are highlighted by bold face |
|----------------------------------------|---------------------------------------------------------------------------------------------------------------------------------------------------------|
| Amisulpride versus <b>olanzapine</b>   | N = 2, n = 455, WMD 1.6, CI -2.3 to 5.5, p = 0.427                                                                                                      |
| <b>Amisulpride</b> versus olanzapine   | N = 2, n = 246, WMD -1.8, CI -19.0 to 15.3, p = 0.833                                                                                                   |
| Amisulpride versus <b>risperidone</b>  | N = 2, n = 291, WMD 0.4, CI -4.6 to 5.3, p = 0.880                                                                                                      |
| <b>Amisulpride</b> versus risperidone  | No data available                                                                                                                                       |
| Amisulpride versus <b>ziprasidone</b>  | No data available                                                                                                                                       |
| <b>Amisulpride</b> versus ziprasidone  | N = 1, n = 122, WMD -2.7, CI -8.9 to 3.5, p = 0.397                                                                                                     |
| Aripiprazole versus <b>olanzapine</b>  | N = 2, n = 794, WMD 5.0, CI 1.9 to 8.1, p = 0.002                                                                                                       |
| <b>Aripiprazole</b> versus olanzapine  | No data available                                                                                                                                       |
| Aripiprazole versus <b>risperidone</b> | N = 2, n = 372, WMD 1.5, CI -3.0 to 6.0, p = 0.509                                                                                                      |
| <b>Aripiprazole</b> versus risperidone | No data available                                                                                                                                       |
| Clozapine versus <b>olanzapine</b>     | N = 3, n = 180, WMD 1.2, CI -2.6 to 4.9, p = 0.549                                                                                                      |
| <b>Clozapine</b> versus olanzapine     | N = 7, n = 619, WMD 1.3, CI -1.3 to 4.0, p = 0.327                                                                                                      |
| Clozapine versus <b>quetiapine</b>     | N = 1, n = 27, WMD -0.2, CI -4.5 to 4.1, p = 0.934                                                                                                      |
| <b>Clozapine</b> versus quetiapine     | N = 1, n = 27, WMD -0.2, CI -4.5 to 4.1, p = 0.934                                                                                                      |
| Clozapine versus <b>risperidone</b>    | N = 4, n = 380, WMD -0.8, CI -6.5 to 4.9, p = 0.793                                                                                                     |
| <b>Clozapine</b> versus risperidone    | N = 4, n = 210, WMD 1.4, CI -2.6 to 5.5, p = 0.494                                                                                                      |
| Clozapine versus <b>ziprasidone</b>    | No data available                                                                                                                                       |

|                                              |                                                              |
|----------------------------------------------|--------------------------------------------------------------|
| <b>Clozapine</b> versus ziprasidone          | N = 1, n = 146, WMD 0.5, CI -6.7 to 7.7, p = 0.892           |
| Clozapine versus <b>zotepine</b>             | No data available                                            |
| <b>Clozapine</b> versus zotepine             | No data available                                            |
| Olanzapine versus <b>quetiapine</b>          | N = 7, n = 1243, WMD -4.4, CI -6.6 to -2.3, p < 0.001        |
| <b>Olanzapine</b> versus quetiapine          | N = 7, n = 1041, WMD -3.7, CI -5.7 to -1.7, p < 0.001        |
| Olanzapine versus <b>risperidone*</b>        | N = 11, n = 1802, WMD -2.5, CI -5.1 to -0.9, p = 0.002       |
| <b>Olanzapine</b> versus risperidone*        | <b>N = 10, n = 1600, WMD -1.4, CI -3.1 to 0.2, p = 0.087</b> |
| <b>Olanzapine</b> versus <b>risperidone*</b> | N = 7, n = 1037, WMD -2.1, CI -4.1 to -0.1, p = 0.043        |
| Olanzapine versus <b>ziprasidone</b>         | N = 4, n = 1291, WMD -8.3, CI -11.0 to -5.6, p < 0.001       |
| <b>Olanzapine</b> versus ziprasidone         | N = 3, n = 762, WMD -7.6, CI -10.9 to -4.4, p < 0.001        |
| Quetiapine versus <b>risperidone</b>         | N = 7, n = 1606, WMD 2.5, CI 0.4 to 4.7, p = 0.022           |
| <b>Quetiapine</b> versus risperidone         | N = 5, n = 1143, WMD 3.9, CI -0.0 to 7.8, p = 0.050          |
| Quetiapine versus <b>ziprasidone</b>         | N = 2, n = 710, WMD -0.1, CI -6.3 to 6.1, p = 0.974          |
| <b>Quetiapine</b> versus ziprasidone         | N = 2, n = 710, WMD -0.1, CI -6.3 to 6.1, p = 0.974          |
| Risperidone versus <b>sertindole</b>         | No data available                                            |
| <b>Risperidone</b> versus sertindole         | N = 2, n = 493, WMD -2.0, CI -12.2 to 8.2, p = 0.704         |
| Risperidone versus <b>ziprasidone</b>        | N = 2, n = 720, WMD -6.1, CI -9.5 to -2.7, p < 0.001         |
| <b>Risperidone</b> versus ziprasidone        | N = 3, n = 1016, WMD -4.6, CI -7.6 to -1.7, p = 0.002        |

\*Olanzapine was not more efficacious than risperidone when studies sponsored by olanzapine's manufacturer were excluded. However, when only neutrally studies were included, olanzapine was again superior (p=0.043, see the third row with both olanzapine and risperidone in bolt print).

We also extensively performed other sensitivity analyses on the primary outcome excluding single blind studies, studies with a Jadad quality score <3, first episode studies, effectiveness studies, CATIE phase II (the same subjects were re-randomized) or Chinese studies. We also addressed first-episode studies and treatment resistant populations separately, we analyzed studies with clozapine doses higher than 400mg/day separately, and we analyzed clozapine studies of at least 3 or 6 months duration separately. We used a fixed effects model instead of the random effects model. It should be noted that by excluding studies in sensitivity analyses the number of studies is sometimes clearly reduced resulting in a loss of power. Nevertheless, the vast majority of these sensitivity analyses was consistent with the primary results. The few

exceptions where the results changed from statistically significant to not statistically significant or vice versa are presented below.

1. Excluding single-blind studies: No comparison of clozapine with zotepine available.
2. Excluding studies with a Jadad quality score <3: The degree as to how well a study is rated on the Jadad scale is partly related to how well the randomization and blinding procedures are documented. All our studies were randomized and at least single-blind and were in general good quality studies. Therefore, our analysis is really between good quality and very good quality. Olanzapine tended to be superior to aripiprazole, but the result was no longer significant, because one of the two studies was excluded (n=91, WMD -3, CI -12.2 to 6.2, p=0.52). It should be noted that the excluded study has to date only been incompletely presented on the internet (11). It was a large industry organized study of likely high quality, but the necessary information was not reported and we therefore had to give it a low quality score. No higher quality studies comparing clozapine with quetiapine, ziprasidone or zotepine were available.
3. Excluding first episode studies: not different from the primary results.
4. Excluding effectiveness studies or CATIE phase II: Risperidone was not significantly different from ziprasidone in the remaining 1 or 2 studies (N=1, n=296, WMD -1.5, CI -6.6 to 3.6, p=0.56; N=2, n=812, WMD -4.0, CI -8.4 to 0.3, p=0.07).
5. Excluding Chinese studies: No comparison of clozapine with zotepine available.
6. First-episode studies separately: The few first-episode studies showed no differences between groups (see discussion in main manuscript).
7. Studies in treatment resistant populations separately: One out of two studies comparing risperidone with sertindole was in treatment-resistant patients (12) and risperidone was superior (n = 321, WMD -6.9, CI -12.1 to -1.7, p= 0.009). In a single study (13) olanzapine tended to be superior to risperidone, but no longer significantly so (n=81, WMD -3.6, CI -13.3 to 6.1, p=0.47). The clozapine results did not change (see main manuscript).
8. The fixed effects model was less conservative in two occasions: clozapine was superior to risperidone for positive symptoms and olanzapine to ziprasidone for negative symptoms.
9. Clozapine doses higher than 400mg/day: clozapine was superior to risperidone (N=2, n=335, WMD -6.6, CI-11.5 to -1.7), but not olanzapine (N=2, n=154, WMD 2.4, CI-2.4 to 7.3). There was no data for other drugs.



**Supplemental Table II:** Results based on Hedges's *g*

We primarily analyzed the studies using weighted mean differences (WMD), since this preserves the original PANSS units, which are intuitively interpreted (e.g. a WMD of 5 means 5 points PANSS difference between the two groups). For a sensitivity analysis we used the standardized effect size (Hedges's *g*, SMD) to include a few more studies (13.3%) using scales other than the PANSS (generally BPRS). The results were very consistent. Only amisulpride was more efficacious than risperidone for negative symptoms (possibly due to increased power).

Only those comparisons with at least one additional study based on a rating scale other than the PANSS are shown. The results are shown only in one direction, for example, as amisulpride versus risperidone, but not again as risperidone versus amisulpride. But the results are symmetrical and only the sign needs to be changed to obtain the reverse result.

The original results based on weighted mean differences (WMD) are shown in the first row for comparison.

The results based on Hedges's *g* (SMD) are presented in the second row.

| <b>OVERALL SYMPTOMS</b>        |                                                                                                                     |
|--------------------------------|---------------------------------------------------------------------------------------------------------------------|
| <b>Comparison</b>              | <b>Results</b>                                                                                                      |
| Amisulpride versus risperidone | N = 2, n = 291, WMD 0.38, CI -4.6 to 5.3, p = 0.880<br>N = 3, n = 519, SMD -0.07, CI -0.24 to 0.10, p = 0.416       |
| Clozapine versus olanzapine    | N = 7, n = 619, WMD 1.3, CI -1.3 to 4.0, p = 0.327<br>N = 10, n = 731, SMD 0.11, CI -0.04 to 0.25, p = 0.147        |
| Clozapine versus quetiapine    | N = 4, n = 232, WMD 0.5, CI -1.9 to 2.9, p = 0.679<br>N = 5, n = 299, SMD 0.07, CI -0.15 to 0.30, p = 0.525         |
| Clozapine versus risperidone   | N = 5, n = 466, WMD -0.04, CI -5.1 to 5.0, p = 0.987<br>N = 8, n = 609, SMD -0.13, CI -0.32 to 0.06, p = 0.182      |
| Olanzapine versus risperidone  | N = 14, n = 2404, WMD -1.9, CI -3.3 to -0.6, p = 0.006<br>N = 16, n = 2438, SMD -0.11, CI -0.19 to -0.03, p = 0.007 |
| Olanzapine versus ziprasidone  | N = 4, n = 1291, WMD -8.3, CI -11.0 to -5.6, p < 0.001<br>N = 5, n = 1542, SMD -0.29, CI -0.41 to -0.16, p < 0.001  |
| Quetiapine versus risperidone  | N = 9, n = 1953, WMD 3.2, CI 1.1 to 5.4, p = 0.003<br>N = 10, n = 1978, SMD 0.19, CI 0.10 to 0.28, p < 0.001        |
| <b>POSITIVE SYMPTOMS</b>       |                                                                                                                     |
| <b>Comparison</b>              | <b>Results</b>                                                                                                      |
| Clozapine versus olanzapine    | N = 6, n = 593, WMD 0.2, CI -1.2 to 0.9, p = 0.744<br>N = 9, n = 669, SMD -0.01, CI -0.17 to 0.14, p = 0.861        |
| Clozapine versus risperidone   | N = 4, n = 541, WMD -0.7, CI -2.4 to 1.0, p = 0.412<br>N = 6, n = 624, SMD -0.14, CI -0.34 to 0.06, p = 0.172       |
| Olanzapine versus quetiapine   | N = 6, n = 646, WMD -1.9, CI -2.7 to -1.1, p < 0.001<br>N = 7, n = 676, SMD -0.49, CI -0.75 to -0.23, p = 0.001     |
| Quetiapine versus risperidone  | N = 7, n = 1264, WMD 1.8, CI 1.2 to 2.5, p < 0.001<br>N = 8, n = 1289, SMD 0.45, CI -0.21 to 0.68, p < 0.001        |
| Risperidone versus ziprasidone | N = 1, n = 204, WMD -2.5, CI -4.6 to -0.4, p = 0.021<br>N = 2, n = 500, SMD -0.02, CI -0.42 to -0.06, p = 0.010     |
| <b>NEGATIVE SYMPTOMS</b>       |                                                                                                                     |
| <b>Comparison</b>              | <b>Results</b>                                                                                                      |
| Amisulpride versus risperidone | N = 3, n = 519, WMD -1.0, CI -2.1 to 0.1, p = 0.078                                                                 |

|                               |                                                                                                                 |
|-------------------------------|-----------------------------------------------------------------------------------------------------------------|
|                               | N = 3, n = 519, SMD -0.18, CI -0.36 to 0.01, p = 0.037                                                          |
| Clozapine versus olanzapine   | N = 6, n = 593, WMD 0.6, CI -0.4 to 1.6, p = 0.227<br>N = 9, n = 669, SMD 0.03, CI -0.16 to 0.21, p = 0.770     |
| Clozapine versus quetiapine   | N = 2, n = 142, WMD 2.2, CI 1.0 to 3.5, p < 0.001<br>N = 3, n = 209, SMD 0.43, CI 0.11 to 0.74, p = 0.009       |
| Clozapine versus risperidone  | N = 4, n = 541, WMD -0.4, CI -1.8 to 1.0, p = 0.575<br>N = 7, n = 664, SMD -0.08, CI -0.23 to 0.07, p = 0.316   |
| Olanzapine versus quetiapine  | N = 6, n = 646, WMD -0.4, CI -1.2 to 0.3, p = 0.266<br>N = 7, n = 676, SMD -0.07, CI -0.23 to 0.07, p = 0.316   |
| Quetiapine versus risperidone | N = 7, n = 1264, WMD -0.3, CI -1.9 to 1.3, p = 0.673<br>N = 8, n = 1298, SMD -0.06, CI -0.33 to 0.21, p = 0.663 |

### Comment on Multiple Statistical Comparisons

In meta-analysis, adjustments for multiple testing are usually not made and meta-analytic textbooks do not even report on it (1-3). In performing meta-analysis of multiple drugs, each with multiple outcomes, the matter is even more complicated. Unfortunately, a traditional correction for multiple testing is not appropriate here. For example, without any hypothesis, the Bonferroni method would expect that in one out of 20 comparisons a p-value below the conventional 0.05 level would occur by chance alone (14). In our case, there have been many well controlled prior studies with all the second-generation antipsychotics (SGAs). Controlled studies indicate that four SGAs – clozapine, amisulpride, olanzapine, risperidone - may be superior to first-generation antipsychotics (FGAs) (15). This evidence also indicates that five SGAs are about equally efficacious as FGAs. Therefore the prediction could be that the four SGAs previously shown to be superior to FGAs would be superior to the other five; and that the other five would be about equal to each other. It would be impossible to apply a correction for multiple testing which only addresses the probability that one of nine is significant. It has nothing to contribute to the prediction that four drugs will be superior to the other five; and that the other five will be approximately equally efficacious. It is further complicated by the fact that clozapine is more firmly established to really be superior than the other three.

There is also a problem of corrections for multiple testing applied to multiple outcomes (for example PANSS total, positive symptoms, etc). In order to make a correction for the fact that two or more outcomes may be correlated, it is important to know the correlation between the various measures in each study. These are not reported in the source literature that is extracted for the meta-analysis. Even if such a correction could be made, it is impossible to do a correction for multiple testing when you would predict that certain drugs would be superior and predict that others would be equal to the comparators. Since it is impossible to do Bonferroni (or similar) corrections, we can only restrict ourselves to general remarks. It may well be that a number of results were due to chance alone, but it is impossible to calculate which ones they are. But our results are remarkably consistent across several outcomes (except for negative symptoms) with sensitivity analyses supporting the validity of our findings. The results are also consistent in that, for example, olanzapine is significantly superior to a number of other SGAs, not only to one. As regards the sensitivity analyses, one expects loss of power as the number of studies in an analysis is restricted. Furthermore, in meta-analysis, sensitivity analyses are not made to dredge the data for statistical significances, but rather to examine the robustness of the results under different conditions. It is almost the opposite of data mining for a significant result.

The Bonferroni correction is most useful in considering blind screening of data sets for association because it estimates the chance that one out of many tests may be significant by chance alone. In sensitivity analysis, one is evaluating whether an interesting result on the primary analysis also occurs under other assumptions. But when a result appears to be significant in the sensitivity analysis, which was not significant in the primary analysis, such a result is likely to be an artefact of multiple testing.

**Supplemental Table III:** Characteristics of included studies

**Quality of Reports of Meta-analysis (QUORUM) flow-diagram describing the search process (16)**

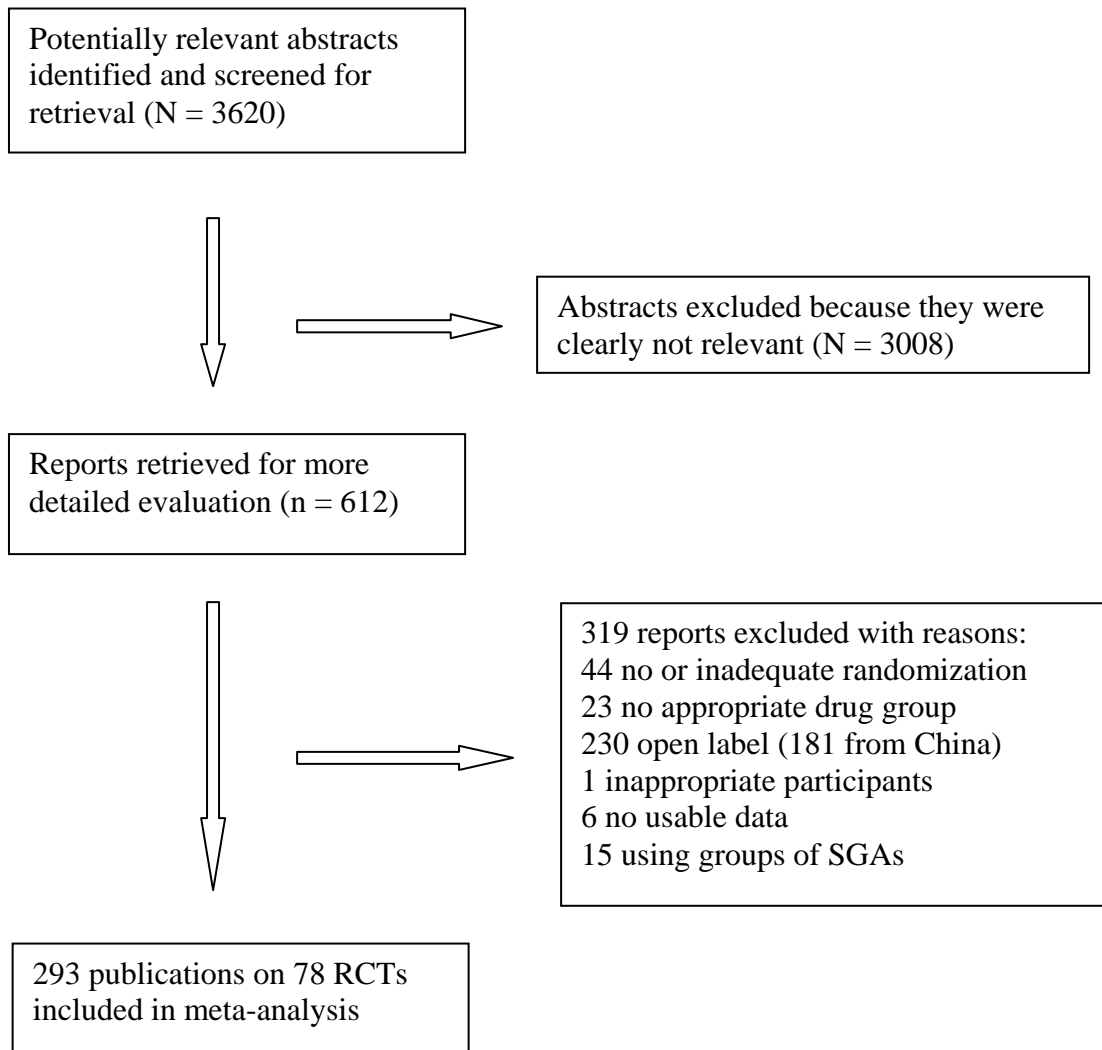

| Author Sponsor's drug                             | Design                                                                                                                                                                                               | Participants                                                                                                                                                                                                                                                                                                                                                                    | Interventions                                                                                                                                                                                   |
|---------------------------------------------------|------------------------------------------------------------------------------------------------------------------------------------------------------------------------------------------------------|---------------------------------------------------------------------------------------------------------------------------------------------------------------------------------------------------------------------------------------------------------------------------------------------------------------------------------------------------------------------------------|-------------------------------------------------------------------------------------------------------------------------------------------------------------------------------------------------|
| <b>Amisulpride versus Aripiprazole</b>            |                                                                                                                                                                                                      |                                                                                                                                                                                                                                                                                                                                                                                 |                                                                                                                                                                                                 |
| No study                                          |                                                                                                                                                                                                      |                                                                                                                                                                                                                                                                                                                                                                                 |                                                                                                                                                                                                 |
| <b>Amisulpride versus Clozapine</b>               |                                                                                                                                                                                                      |                                                                                                                                                                                                                                                                                                                                                                                 |                                                                                                                                                                                                 |
| No study                                          |                                                                                                                                                                                                      |                                                                                                                                                                                                                                                                                                                                                                                 |                                                                                                                                                                                                 |
| <b>Amisulpride versus Olanzapine</b>              |                                                                                                                                                                                                      |                                                                                                                                                                                                                                                                                                                                                                                 |                                                                                                                                                                                                 |
| <b>Leclubier et al. 2006 (17)</b><br>Olanzapine   | Allocation: random, no further details<br>Blinding: double, no further details.<br>Duration: 26 weeks.<br>Design: parallel.<br>Location: multicentre.<br>Setting: in- and outpatient.                | Diagnosis: (DSM-IV) schizophrenia catatonic (n=11), disorganised (n=102) or residual (n=131), SANS severity score of 10 or more (excluding the item attention). N=245.<br>Gender: 167 M, 78 F.<br>Age: mean 37.4 years<br>History: duration ill mean 11.2 years<br>age at onset n.i.                                                                                            | 1. Amisulpride: Fixed dose: 150 mg/day. N=70.<br>2. Olanzapine: Fixed dose: 5 mg/day. N=70.<br>3. Olanzapine: Fixed dose: 20 mg/day. N=70.                                                      |
| <b>Mortimer et al. 2004 (18)</b><br>Amisulpride   | Allocation: random, computer-generated randomisation.<br>Blinding: double, identical capsules.<br>Duration: 24 weeks.<br>Design: parallel.<br>Location: multicenter.<br>Setting: in- and outpatient. | Diagnosis: (DSM-IV) schizophrenia disorganised (n=33), paranoid (n=260) or undifferentiated (n=76) or schizophreniform disorder (n=8), dominant positive symptoms, BPRS of 36 or more, PANSS positive score higher than PANSS negative score. N=377.<br>Gender: 245 M, 132 F.<br>Age: 18-65 years, mean=37.8 years.<br>History: duration ill mean=8.84 years, age at onset n.i. | 1. Amisulpride: Flexible dose. Allowed dose range: 200-800 mg/day. Mean dose: 504 mg/day. N=189.<br>2. Olanzapine: Flexible dose. Allowed dose range: 5-20 mg/day. Mean dose: 13 mg/day. N=188. |
| <b>Vanelle and Douki 2006 (19)</b><br>Amisulpride | Allocation: random, no further details.<br>Blinding: double, no further details.<br>Duration: 8 weeks.<br>Design: parallel.<br>Location: multicentre.<br>Setting: in- and outpatient.                | Diagnosis: (DSM-IV) schizophrenia and comorbid depression, disorganised (n=26), paranoid (n=32), undifferentiated (n=23) or residual (n=4). N=85.<br>Gender: 54 M, 31 F.<br>Age: 18-65 years (mean=34 years).<br>History: duration ill n.i., age at onset n.i.                                                                                                                  | 1. Amisulpride: Flexible dose. Allowed dose range: 200-600 mg/day. Mean dose: 471 mg/day. N=45.<br>2. Olanzapine: Flexible dose. Allowed dose range: 5-15 mg/day. Mean dose: 11.4 mg/day. N=40. |

|                                                 |                                                                                                                                                                                                                                  |                                                                                                                                                                                                                                                                                                                                                                              |                                                                                                                                                                                                    |
|-------------------------------------------------|----------------------------------------------------------------------------------------------------------------------------------------------------------------------------------------------------------------------------------|------------------------------------------------------------------------------------------------------------------------------------------------------------------------------------------------------------------------------------------------------------------------------------------------------------------------------------------------------------------------------|----------------------------------------------------------------------------------------------------------------------------------------------------------------------------------------------------|
| <b>Wagner et al. 2005 (20)</b><br>Olanzapine    | Allocation: random, medication containers according to a pseudo-random computer algorithm.<br>Blinding: double, no further details.<br>Duration: 8 weeks.<br>Design: parallel.<br>Location: singlecentre.<br>Setting: inpatient. | Diagnosis: (DSM-IV and ICD-10) schizophrenia, CGI of 4 or more, PANSS of 61 or more. N=52.<br>Gender: 23 M, 13 F (of subjects with neuropsychological data, n=36).<br>Age: 18-65 years, mean=36.3 years.<br>History: duration ill mean=8.4 years (of subjects with neuropsychological data, n=36), age at onset 27.9 years (of subjects with neuropsychological data, n=36). | 1. Amisulpride: Flexible dose. Allowed dose range: 400-800 mg/day. Mean dose: 511.1 mg/day. N=26.<br>2. Olanzapine: Flexible dose. Allowed dose range: 10-20 mg/day. Mean dose: 15.0 mg/day. N=26. |
| <b>Amisulpride versus Quetiapine</b>            |                                                                                                                                                                                                                                  |                                                                                                                                                                                                                                                                                                                                                                              |                                                                                                                                                                                                    |
| No study                                        |                                                                                                                                                                                                                                  |                                                                                                                                                                                                                                                                                                                                                                              |                                                                                                                                                                                                    |
| <b>Amisulpride versus Risperidone</b>           |                                                                                                                                                                                                                                  |                                                                                                                                                                                                                                                                                                                                                                              |                                                                                                                                                                                                    |
| <b>Hwang et al. 2003 (21)</b><br>Amisulpride    | Allocation: random, no further details.<br>Blinding: double, identical capsules.<br>Duration: 6 weeks.<br>Design: parallel.<br>Location: multicentre.<br>Setting: n.i.                                                           | Diagnosis: (DSM-IV) schizophrenia disorganised (n=9), paranoid (n=22), undifferentiated (n=16). N=48.<br>Gender: 20 M, 27 F<br>Age: 18-65 years, mean=35.2 years.<br>History: duration ill mean: 13.4 years, age at onset n.i.                                                                                                                                               | 1. Amisulpride: Flexible dose. Allowed dose range: 400-800 mg/day.<br>Mean dose: 630 mg/day. N=23<br>2. Risperidone: Flexible dose. Allowed dose range: 4-8 mg/day. Mean dose: 6.88 mg/day. N=25.  |
| <b>Möller et al. 2005 (22)</b><br>Amisulpride   | Allocation: random, no further details.<br>Blinding: double, no further details.<br>Duration: 6 weeks.<br>Design: parallel.<br>Location: n.i.<br>Setting: n.i.                                                                   | Diagnosis: (DSM-IV) schizophrenia, schizophreniform disorder, schizoaffective disorder, delusional disorder or shared psychotic disorder. N=36.<br>Gender: n.i.<br>Age: 65 years or more.<br>History: duration ill n.i., age at onset n.i.                                                                                                                                   | 1. Amisulpride: Flexible dose. Allowed dose range: 100-400 mg/day.<br>Mean dose: n.i. N=24.<br>2. Risperidone: Flexible dose. Allowed dose range: 1-4 mg/day. Mean dose: n.i. N=12.                |
| <b>Peuskens et al. 1999 (23)</b><br>Amisulpride | Allocation: random, no further details.<br>Blinding: double, identical capsules.<br>Duration: 8 weeks.<br>Design: parallel.<br>Location: multicentre.<br>Setting: in- and outpatient                                             | Diagnosis: (DSM-IV) schizophrenia disorganised, paranoid or undifferentiated, BPRS of 36 or more. N=228.<br>Gender: 137 M, 91 F.<br>Age: 18-65 years, mean =36.5 years<br>History: duration ill mean 9.1 years, age at onset n.i.                                                                                                                                            | 1. Amisulpride: Fixed dose: 800 mg/day. N=115.<br>2. Risperidone: Fixed dose: 8 mg/day. N=113.                                                                                                     |

|                                                     |                                                                                                                                                                                        |                                                                                                                                                                                                                                                                                                                        |                                                                                                                                                                                                      |
|-----------------------------------------------------|----------------------------------------------------------------------------------------------------------------------------------------------------------------------------------------|------------------------------------------------------------------------------------------------------------------------------------------------------------------------------------------------------------------------------------------------------------------------------------------------------------------------|------------------------------------------------------------------------------------------------------------------------------------------------------------------------------------------------------|
| <b>Sechter et al. 2002 (24)</b><br>Amisulpride      | Allocation: random, no further details.<br>Blinding: double, no further details.<br>Duration: 26 weeks.<br>Design: parallel.<br>Location: multicentre.<br>Setting: in- and outpatient. | Diagnosis: (DSM-IV) chronic schizophrenia disorganised (n=37), paranoid (n=227), residual (n=19) or undifferentiated (n=27), PANSS between 60 and 120, recent worsening of symptoms. N=310.<br>Gender: 170 M, 140 F.<br>Age: 18-65 years, mean=38.4 years.<br>History: duration ill mean=11.8 years, age at onset n.i. | 1. Amisulpride: Flexible dose. Allowed dose range: 400-1000 mg/day. Mean dose: 683 mg/day. N=152.<br>2. Risperidone: Flexible dose. Allowed dose range: 4-10 mg/day. Mean dose: 6.92 mg/day. N=158.  |
| <b>Amisulpride versus Sertindole</b>                |                                                                                                                                                                                        |                                                                                                                                                                                                                                                                                                                        |                                                                                                                                                                                                      |
| No study                                            |                                                                                                                                                                                        |                                                                                                                                                                                                                                                                                                                        |                                                                                                                                                                                                      |
| <b>Amisulpride versus Ziprasidone</b>               |                                                                                                                                                                                        |                                                                                                                                                                                                                                                                                                                        |                                                                                                                                                                                                      |
| <b>Olié et al. 2006 (25)</b><br>Ziprasidone         | Allocation: random, no further details.<br>Blinding: double, no further details.<br>Duration: 12 weeks.<br>Design: parallel.<br>Location: multicentre.<br>Setting: outpatient.         | Diagnosis: (DSM-III-R) chronic schizophrenia, PANSS negative subscore at least 6 points higher than PANSS positive subscore. N=123.<br>Gender: 79 M, 44 F.<br>Age: 18-64 years, mean=39 years.<br>History: duration ill n.i., age at onset n.i.                                                                        | 1. Amisulpride: Flexible dose. Allowed dose range: 100-200 mg/day. Mean dose: 144.7mg/day. N=63.<br>2. Ziprasidone: Flexible dose. Allowed dose range: 80-160 mg/day. Mean dose: 118.0 mg/day. N=60. |
| <b>Amisulpride versus Zotepine</b>                  |                                                                                                                                                                                        |                                                                                                                                                                                                                                                                                                                        |                                                                                                                                                                                                      |
| No study                                            |                                                                                                                                                                                        |                                                                                                                                                                                                                                                                                                                        |                                                                                                                                                                                                      |
| <b>Aripiprazole versus Clozapine</b>                |                                                                                                                                                                                        |                                                                                                                                                                                                                                                                                                                        |                                                                                                                                                                                                      |
| No study                                            |                                                                                                                                                                                        |                                                                                                                                                                                                                                                                                                                        |                                                                                                                                                                                                      |
| <b>Aripiprazole versus Olanzapine</b>               |                                                                                                                                                                                        |                                                                                                                                                                                                                                                                                                                        |                                                                                                                                                                                                      |
| <b>Study BMS CN138003 2005 (11)</b><br>Aripiprazole | Allocation: random nfd<br>Blinding: double<br>Duration: 52 weeks first 6 weeks observed<br>Design: parallel<br>Location: multicentre<br>Setting: in and outpatients                    | Diagnosis: acute schizophrenia PANSS of 60 or more<br>Gender: n.i.<br>Age: n.i.<br>History: duration ill, age at onset: n.i.                                                                                                                                                                                           | 1. Aripiprazole Fixed/flexible dose (15, 20, 30 mg) Mean dose: n.i. N=355<br>2. Olanzapine Fixed/flexible dose (10, 15, 20mg) Mean dose: n.i. N=348                                                  |

|                                                 |                                                                                                                                                                                                             |                                                                                                                                                                                                                                                                                                                                     |                                                                                                                                                                                                    |
|-------------------------------------------------|-------------------------------------------------------------------------------------------------------------------------------------------------------------------------------------------------------------|-------------------------------------------------------------------------------------------------------------------------------------------------------------------------------------------------------------------------------------------------------------------------------------------------------------------------------------|----------------------------------------------------------------------------------------------------------------------------------------------------------------------------------------------------|
| <b>McQuade et al. 2004 (26)</b><br>Aripiprazole | Allocation: random, no further details.<br>Blinding: double, no further details.<br>Duration: 26 weeks.<br>Design: parallel.<br>Location: multicentre.<br>Setting: originally inpatient                     | Diagnosis: (DSM-IV) schizophrenia disorganised (n=17), paranoid (n=271), residual (n=3) or undifferentiated (n=26), in acute relapse. PANSS total score of 60 or more. N=317.<br>Gender: 229 M, 88 F.<br>Age: >17 years, mean=38.4 years.<br>History: duration ill n.i., age at first hospitalisation mean=24.50 years.             | 1. Aripiprazole: Flexible dose. Allowed dose range: 15-30 mg/day. Mean dose: 25.1 mg/day. N=156.<br>2. Olanzapine: Flexible dose. Allowed dose range: 10-20 mg/day. Mean dose: 16.5 mg/day. N=161. |
| <b>Aripiprazole versus Quetiapine</b>           |                                                                                                                                                                                                             |                                                                                                                                                                                                                                                                                                                                     |                                                                                                                                                                                                    |
| No study                                        |                                                                                                                                                                                                             |                                                                                                                                                                                                                                                                                                                                     |                                                                                                                                                                                                    |
| <b>Aripiprazole versus Risperidone</b>          |                                                                                                                                                                                                             |                                                                                                                                                                                                                                                                                                                                     |                                                                                                                                                                                                    |
| <b>Chan et al. 2007 (27)</b><br>Aripiprazole    | Allocation: random, permuted block randomisation stratified by centre.<br>Blinding: double, identical capsules.<br>Duration: 4 weeks.<br>Design: parallel.<br>Location: multicentre.<br>Setting: inpatient. | Diagnosis: (DSM-IV) schizophrenia (n=80) or schizoaffective disorder (n=3), acute relapse. PANSS total score of 60 or more. N=83.<br>Gender: 45 M, 38 F.<br>Age: 18-65 years, mean =35.2 years<br>History: duration ill n.i., age at onset n.i.                                                                                     | 1. Aripiprazole: Fixed dose: 15 mg/day. N=49.<br>2. Risperidone: Fixed dose: 6 mg/day. N=34.                                                                                                       |
| <b>Potkin et al. 2003 (28)</b><br>Aripiprazole  | Allocation: random, no further details.<br>Blinding: double, identical capsules.<br>Duration: 4 weeks.<br>Design: parallel.<br>Location: multicentre.<br>Setting: inpatient.                                | Diagnosis: (DSM-IV) schizophrenia (n=289) or schizoaffective disorder (n=115), hospitalised due to an acute relapse, response to previous antipsychotic treatment other than clozapine, PANSS of 60 or more. N=404.<br>Gender: 283 M, 121 F.<br>Age: 18-65 years, mean=38.9 years.<br>History: duration ill n.i., age at onset n.i. | 1. Aripiprazole: Fixed dose: 20 mg/day. N=101.<br>2. Aripiprazole: Fixed dose: 30 mg/day. N=101.<br>3. Risperidone: Fixed dose: 6 mg/day. N=99.                                                    |
| <b>Aripiprazole versus Sertindole</b>           |                                                                                                                                                                                                             |                                                                                                                                                                                                                                                                                                                                     |                                                                                                                                                                                                    |
| No study                                        |                                                                                                                                                                                                             |                                                                                                                                                                                                                                                                                                                                     |                                                                                                                                                                                                    |
| <b>Aripiprazole versus Ziprasidone</b>          |                                                                                                                                                                                                             |                                                                                                                                                                                                                                                                                                                                     |                                                                                                                                                                                                    |
| No study                                        |                                                                                                                                                                                                             |                                                                                                                                                                                                                                                                                                                                     |                                                                                                                                                                                                    |
| <b>Aripiprazole versus Zotepine</b>             |                                                                                                                                                                                                             |                                                                                                                                                                                                                                                                                                                                     |                                                                                                                                                                                                    |
| No study                                        |                                                                                                                                                                                                             |                                                                                                                                                                                                                                                                                                                                     |                                                                                                                                                                                                    |



## Clozapine versus Olanzapine

|                                                                   |                                                                                                                                                                                                              |                                                                                                                                                                                                                                                                                        |                                                                                                                                                                                                                                                                                                                                                                                                                          |
|-------------------------------------------------------------------|--------------------------------------------------------------------------------------------------------------------------------------------------------------------------------------------------------------|----------------------------------------------------------------------------------------------------------------------------------------------------------------------------------------------------------------------------------------------------------------------------------------|--------------------------------------------------------------------------------------------------------------------------------------------------------------------------------------------------------------------------------------------------------------------------------------------------------------------------------------------------------------------------------------------------------------------------|
| <p><b>Bitter et al. 2003 (29)</b><br/><br/>Olanzapine</p>         | <p>Allocation: random, no further details.<br/>Blinding: double, no further details.<br/>Duration: 18 weeks.<br/>Design: parallel.<br/>Location: multicentre.<br/>Setting: inpatient.</p>                    | <p>Diagnosis: (DSM-IV) schizophrenia, non-response to, or intolerance of standard antipsychotic therapy, BPRS of 42 or more. N=147 (enrollment population N=150).<br/>Gender: 88 M, 59 F.<br/>Age: 18-65 years, mean=37.6 years.<br/>History: duration ill n.i., age at onset n.i.</p> | <p>1. Clozapine: Flexible dose. Allowed dose range: 100-500 mg/day. Mean dose: 216.2 mg/day. N=72 (enrollment population N=74).<br/><br/>2. Olanzapine: Flexible dose. Allowed dose range: 5-25 mg/day. Mean dose: 17.2 mg/day. N=75 (enrollment population N=74).</p>                                                                                                                                                   |
| <p><b>Conley et al. 2003 (30)</b><br/><br/>Neutral sponsor</p>    | <p>Allocation: random, no further details.<br/>Blinding: double, no further details.<br/>Duration: 16 weeks (first 8 weeks observed).<br/>Design: cross-over.<br/>Location: n.i.<br/>Setting: n.i.</p>       | <p>Diagnosis: (DSM-IV) schizophrenia, resistance to previous treatment. BPRS of 45 or more. CGI of 4 or more. N=13.<br/>Gender: 8 M, 5 F.<br/>Age: mean= 37.58 years.<br/>History: duration ill n.i., age at onset n.i.</p>                                                            | <p>1. Clozapine: Fixed dose: 450 mg/day. N=5.<br/><br/>2. Olanzapine: Fixed dose: 50 mg/day. N=8.</p>                                                                                                                                                                                                                                                                                                                    |
| <p><b>Krakowski et al. 2006 (31)</b><br/><br/>Neutral sponsor</p> | <p>Allocation: random, block randomisation (block size of 3).<br/>Blinding: double, no further details.<br/>Duration: 12 weeks.<br/>Design: parallel.<br/>Location: multicentre.<br/>Setting: inpatient.</p> | <p>Diagnosis: (DSM-IV) schizophrenia (n=71) or schizoaffective disorder (n=39), persistent aggression. N=110.<br/>Gender: 90 M, 20 F.<br/>Age: 18-60 years, mean: 34 years.<br/>History: duration ill mean:15.5 years, age at onset n.i.</p>                                           | <p>1. Clozapine: Flexible dose. Allowed dose range: 200-800 mg/day. Mean dose: 565.5 mg/day (at the end of the last 6 weeks). N=37.<br/><br/>2. Haloperidol: Flexible dose. Allowed dose range: 10-30 mg/day. Mean dose: 23.3 mg/day (at the end of the last 6 weeks). N=36.<br/><br/>3. Olanzapine: Flexible dose. Allowed dose range: 10-35 mg/day. Mean dose: 24.7 mg/day (at the end of the last 6 weeks). N=37.</p> |

|                                                 |                                                                                                                                                                                                                           |                                                                                                                                                                                                                                                                                                                           |                                                                                                                                                                                                   |
|-------------------------------------------------|---------------------------------------------------------------------------------------------------------------------------------------------------------------------------------------------------------------------------|---------------------------------------------------------------------------------------------------------------------------------------------------------------------------------------------------------------------------------------------------------------------------------------------------------------------------|---------------------------------------------------------------------------------------------------------------------------------------------------------------------------------------------------|
| <b>Meltzer et al. 2003 (32)</b><br>Clozapine    | Allocation: random, no further details<br>Blinding: single, rater-blinded. Duration: 104 weeks.<br>Design: parallel.<br>Location: multicentre.<br>Setting: in- and outpatient.                                            | Diagnosis: (DSM-IV) schizophrenia (n=609) or schizoaffective disorder (n=371), high suicidal risk. N=980.<br>Gender: 602 M, 378 F.<br>Age: 18-65 years, mean=37.1 years.<br>History: duration ill n.i., age at onset mean=24.7 years.                                                                                     | 1. Clozapine: Flexible dose. Allowed dose range: 200-900 mg/day. Mean dose: 274.2 mg/day. N=490.<br>2. Olanzapine: Flexible dose. Allowed dose range: 5-20 mg/day. Mean dose: 16.6 mg/day. N=490. |
| <b>Moresco et al. 2004 (33)</b><br>Olanzapine   | Allocation: random, no further details.<br>Blinding: double, no further details.<br>Duration: 8 weeks.<br>Design: parallel.<br>Location: singlecentre.<br>Setting: inpatient                                              | Diagnosis: (DSM-IV) schizophrenia, treatment resistance to two previous antipsychotic medications. BPRS score of 27 or more. N=23.<br>Gender: 16 M, 7 F.<br>Age: 18 years or more, mean =36.2 years<br>History: duration ill n.i., age at onset n.i.                                                                      | 1. Clozapine: Flexible dose. Allowed dose range: 300-400 mg/day. Mean dose: 325.4 mg/day. N=12.<br>2. Olanzapine: Flexible dose. Allowed dose range: 15-20 mg/day. Mean dose: 18.3 mg/day. N=11.  |
| <b>Naber et al. 2005 (34)</b><br>Olanzapine     | Allocation: random, computer-generated randomisation.<br>Blinding: double, identical capsules.<br>Duration: 26 weeks.<br>Design: parallel.<br>Location: multicentre.<br>Setting: in- and outpatient, initially inpatient. | Diagnosis: (DSM-IV) schizophrenia, non-response to, or intolerance of standard antipsychotic therapy, BPRS of 24 or more. N=114.<br>Gender: 69 M, 45 F.<br>Age: 18-65 years, mean=34.0 years.<br>History: duration ill n.i., age at onset 26.9 years.                                                                     | 1. Clozapine: Flexible dose. Allowed dose range: 100-400 mg/day. Mean dose: 209 mg/day. N=57.<br>2. Olanzapine: Flexible dose. Allowed dose range: 5-25 mg/day. Mean dose: 16.2 mg/day. N=57.     |
| <b>Shaw et al. 2006 (35)</b><br>Neutral sponsor | Allocation: random, random-numbers chart, blocks of 4.<br>Blinding: double, identical capsules.<br>Duration: 8 weeks.<br>Design: parallel.<br>Location: n.i.<br>Setting: inpatient.                                       | Diagnosis: (DSM-IV) schizophrenia, treatment resistant to two previous antipsychotics, IQ of 70 or more. N=25.<br>Gender: 15 M, 10 F.<br>Age: 7-16 years, mean =12.3 years.<br>History: duration ill mean =3.2 years, age at onset mean =9.1 years                                                                        | 1. Clozapine: Flexible dose. Allowed dose range: 150-500 mg/day. Mean dose: 327 mg/day. N=12.<br>2. Olanzapine: Flexible dose. Allowed dose range: 5-20 mg/day. Mean dose: 18.1 mg/day. N=13.     |
| <b>Tollefson et al. 2001 (36)</b><br>Olanzapine | Allocation: random, no further details.<br>Blinding: double, no further details.<br>Duration: 18 weeks.<br>Design: parallel.<br>Location: multicentre.<br>Setting: in- and outpatient.                                    | Diagnosis: (DSM-IV) schizophrenia catatonic (n=3), disorganised (n=34), paranoid (n=101), residual (n=8) or undifferentiated (n=34), previous treatment resistance, BPRS of 45 or more. N=180.<br>Gender: 115 M, 65 F.<br>Age: 18-70 years, mean=38.6 years.<br>History: duration ill n.i., age at onset mean=22.8 years. | 1. Clozapine: Flexible dose. Allowed dose range: 200-600 mg/day. Mean dose: 303.6 mg/day. N=90.<br>2. Olanzapine: Flexible dose. Allowed dose range: 15-25 mg/day. Mean dose: 20.5 mg/day. N=90.  |

|                                                               |                                                                                                                                                                                                    |                                                                                                                                                                                                                                                                                                  |                                                                                                                                                                                                                                                                                                                                                                                                                                                                                                                                                            |
|---------------------------------------------------------------|----------------------------------------------------------------------------------------------------------------------------------------------------------------------------------------------------|--------------------------------------------------------------------------------------------------------------------------------------------------------------------------------------------------------------------------------------------------------------------------------------------------|------------------------------------------------------------------------------------------------------------------------------------------------------------------------------------------------------------------------------------------------------------------------------------------------------------------------------------------------------------------------------------------------------------------------------------------------------------------------------------------------------------------------------------------------------------|
| <p><b>Volavka et al. 2002 (13)</b></p> <p>Neutral sponsor</p> | <p>Allocation: random, no further details.<br/>Blinding: double, identical capsules.<br/>Duration: 14 weeks.<br/>Design: parallel.<br/>Location: multicentre.<br/>Setting: inpatient.</p>          | <p>Diagnosis: (DSM-IV) chronic schizophrenia (n=135) or schizoaffective disorder (n=22), suboptimal response to previous treatment, PANSS of 60 or more. N=167.<br/>Gender: 133 M, 24 F.<br/>Age: 18-60 years, mean=40.8 years.<br/>History: duration ill mean=19.5 years, age at onset n.i.</p> | <p>1. Clozapine: Flexible dose. Allowed dose range: 200-800 mg/day. Mean dose: 526.6 mg/day (at the end of the last 6 weeks). N=40.</p> <p>2. Haloperidol: Flexible dose. Allowed dose range: 10-30 mg/day. Mean dose: 25.7 mg/day (at the end of the last 6 weeks). N=37.</p> <p>3. Olanzapine: Flexible dose. Allowed dose range: 10-40 mg/day. Mean dose: 30.4 mg/day (at the end of the last 6 weeks). N=39.</p> <p>4. Risperidone: Flexible dose. Allowed dose range: 4-16 mg/day. Mean dose: 11.6 mg/day (at the end of the last 6 weeks). N=41.</p> |
| <p><b>Atmaca et al. 2003 (37)</b></p> <p>Neutral sponsor</p>  | <p>Allocation: random, no further details.<br/>Blinding: single, rater-blinded.<br/>Duration: 6 weeks.<br/>Design: parallel.<br/>Location: singlecentre.<br/>Setting: inpatient.</p>               | <p>Diagnosis: (DSM-IV) schizophrenia. N=56.<br/>Gender: 24 M, 29 F.<br/>Age: 19-46 years, mean=30.8 years.<br/>History: duration ill mean=6.1 years, age at onset n.i.</p>                                                                                                                       | <p>1. Clozapine: Flexible dose. Allowed dose range: n.i. Mean dose: 207.1 mg/day. N=14.</p> <p>2. Olanzapine: Flexible dose. Allowed dose range: n.i. Mean dose: 15.7 mg/day. N=14.</p> <p>3. Quetiapine: Flexible dose. Allowed dose range: n.i. Mean dose: 535.7 mg/day. N=14.</p> <p>4. Risperidone: Flexible dose. Allowed dose range: n.i. Mean dose: 6.7 mg/day. N=14.</p>                                                                                                                                                                           |
| <p><b>Wang et al. 2002 (38)</b></p> <p>Unclear</p>            | <p>Allocation: random, no further details.<br/>Blinding: double, no further details.<br/>Duration: 8 weeks.<br/>Design: parallel.<br/>Location: singlecentre.<br/>Setting: in- and outpatient.</p> | <p>Diagnosis: (CCMD-3) schizophrenia. N=61.<br/>Gender: 29 M, 32 F.<br/>Age: mean=27,9 years,<br/>History: duration ill mean=4.2 years, age at onset n.i.</p>                                                                                                                                    | <p>1. Clozapine: Flexible dose. Allowed dose range: 25-400 mg/day. Mean dose: n.i. N=31.</p> <p>2. Olanzapine: Flexible dose. Allowed dose range: 5-20 mg/day. Mean dose: n.i. N=30.</p>                                                                                                                                                                                                                                                                                                                                                                   |

|                                                   |                                                                                                                                                                                                     |                                                                                                                                                                                                                                                                          |                                                                                                                                                                                                                                                                                                                                                                          |
|---------------------------------------------------|-----------------------------------------------------------------------------------------------------------------------------------------------------------------------------------------------------|--------------------------------------------------------------------------------------------------------------------------------------------------------------------------------------------------------------------------------------------------------------------------|--------------------------------------------------------------------------------------------------------------------------------------------------------------------------------------------------------------------------------------------------------------------------------------------------------------------------------------------------------------------------|
| <b>Kumra et al. 2007 (39)</b><br>Neutral sponsor  | Allocation: computer generated randomization list handled by research pharmacist.<br>Blinding: double.<br>Duration: 12 weeks.<br>Design: parallel.<br>Location: two centres.<br>Setting: inpatient. | Diagnosis: (Kiddie-SADS) schizophrenia, schizoaffective disorder. N=39.<br>Gender: 21 M, 18 F.<br>Age: mean=15.6 years.<br>History: treatment refractory (2 unsuccessful adequate antipsychotic drug trials, BPRS > 35, at least 2 psychotic symptoms moderate or more). | 1. Clozapine: Flexible dose. Maximum dose: 900mg/day Mean dose: 403.1. N=18<br><br>2. Olanzapine: Flexible dose. Maximum dose 30mg/day, mean dose 26.2. N=21                                                                                                                                                                                                             |
| <b>Clozapine versus Quetiapine</b>                |                                                                                                                                                                                                     |                                                                                                                                                                                                                                                                          |                                                                                                                                                                                                                                                                                                                                                                          |
| <b>Atmaca et al. 2003 (37)</b><br>Neutral sponsor | Allocation: random, no further details.<br>Blinding: single, rater-blinded. Duration: 6 weeks. Design: parallel. Location: singlecentre. Setting: inpatient.                                        | Diagnosis: (DSM-IV) schizophrenia. N=56.<br>Gender: 24 M, 29 F.<br>Age: 19-46 years, mean=30.8 years.<br>History: duration ill mean clozapine=6.1 years, age at onset n.i.                                                                                               | 1. Clozapine: Flexible dose. Allowed dose range: n.i. Mean dose: 207.1 mg/day. N=14.<br><br>2. Olanzapine: Flexible dose Allowed dose range: n.i. Mean dose: 15.7 mg/day. N=14.<br><br>3. Quetiapine: Flexible dose. Allowed dose range: n.i. Mean dose: 535.7 mg/day. N=14.<br><br>4. Risperidone: Flexible dose. Allowed dose range: n.i. Mean dose: 6.7 mg/day. N=14. |
| <b>Li 2003 (40)</b><br>Unclear                    | Allocation: random, no further details.<br>Blinding: single, rater-blinded.<br>Duration: 8 weeks.<br>Design: parallel.<br>Location: singlecentre.<br>Setting: inpatient.                            | Diagnosis: (CCMD-2) schizophrenia. N=76.<br>Gender: n.i.<br>Age: mean=35.5 years,<br>History: duration ill: mean=5.92 years, age at onset n.i.                                                                                                                           | 1. Clozapine: Allowed dose range: start with 25 mg, in two weeks supposed dose, n.f.d. Mean dose: 325 mg/day. N=38.<br><br>2. Quetiapine: Allowed dose range: start with 25 mg, in two weeks supposed dose, n.f.d. Mean dose: 375 mg/day. N=38.                                                                                                                          |
| <b>Li and Feng 2005 (41)</b><br>Unclear           | Allocation: random, no further details.<br>Blinding: double, no further details.<br>Duration: 12 weeks.<br>Design: parallel.<br>Location: singlecentre.<br>Setting: inpatient.                      | Diagnosis: (CCMD-3) schizophrenia. N=67.<br>Gender: n.i..<br>Age: mean=26.18 years.<br>History: duration ill mean =0.5 years, age at onset n.i.                                                                                                                          | 1. Clozapine: Flexible dose. Allowed dose range: 100-550 mg/day. Mean dose: 255.96 mg/day. N=34.<br><br>2. Quetiapine: Flexible dose. Allowed dose range: 150-650 mg/day. Mean dose: 362.09 mg/day. N=33.                                                                                                                                                                |

|                                                           |                                                                                                                                                                                                    |                                                                                                                                                                                |                                                                                                                                                                                                                                                                                                                                                                         |
|-----------------------------------------------------------|----------------------------------------------------------------------------------------------------------------------------------------------------------------------------------------------------|--------------------------------------------------------------------------------------------------------------------------------------------------------------------------------|-------------------------------------------------------------------------------------------------------------------------------------------------------------------------------------------------------------------------------------------------------------------------------------------------------------------------------------------------------------------------|
| <p><b>Li et al. 2002 (42)</b><br/>Unclear</p>             | <p>Allocation: random, no further details.<br/>Blinding: double, no further details.<br/>Duration: 8 weeks.<br/>Design: parallel.<br/>Location: singlecentre.<br/>Setting: in- and outpatient.</p> | <p>Diagnosis: (CCMD-3) first episode schizophrenia. N=63.<br/>Gender: M n.i., F n.i.<br/>Age: mean =29 years.<br/>History: duration ill mean=0.64 years, age at onset n.i.</p> | <p>1. Clozapine: Flexible dose. Allowed dose range: 25-750 mg/day. Mean dose: 270.5 mg/day. N=31.<br/>2. Quetiapine: Flexible dose. Allowed dose range: 25-750 mg/day. Mean dose: 478.5 mg/day. N=32.</p>                                                                                                                                                               |
| <p><b>Liu et al. 2004 (43)</b><br/>Neutral sponsor</p>    | <p>Allocation: random, no further details.<br/>Blinding: single, rater-blinded.<br/>Duration: 12 weeks.<br/>Design: parallel.<br/>Location: singlecentre.<br/>Setting: inpatient.</p>              | <p>Diagnosis: (CCMD-3) schizophrenia. N=72.<br/>Gender: n.i. M, n.i. F.<br/>Age: mean=37.2 years,<br/>History: duration ill mean clozapine=9 years, age at onset n.i.</p>      | <p>1. Clozapine: Flexible dose. Allowed dose range: initial dose: 50 mg/day, after 10 days: 400-600 mg/day. Mean dose: n.i. N=36<br/>2. Quetiapine: Flexible dose. Allowed dose range: initial dose: 100 mg/day, after 10 days: 400-700 mg/day. Mean dose: n.i. N=36</p>                                                                                                |
| <p><b>Clozapine versus Risperidone</b></p>                |                                                                                                                                                                                                    |                                                                                                                                                                                |                                                                                                                                                                                                                                                                                                                                                                         |
| <p><b>Atmaca et al. 2003 (37)</b><br/>Neutral sponsor</p> | <p>Allocation: random, no further details.<br/>Blinding: single, rater-blinded.<br/>Duration: 6 weeks.<br/>Design: parallel.<br/>Location: singlecentre.<br/>Setting: inpatient.</p>               | <p>Diagnosis: (DSM-IV) schizophrenia. N=56.<br/>Gender: 24 M, 29 F.<br/>Age: 19-46 years, mean=30.8 years.<br/>History: duration ill mean=6.1 years, age at onset n.i.</p>     | <p>1. Clozapine: Flexible dose. Allowed dose range: n.i. Mean dose: 207.1 mg/day. N=14.<br/>2. Olanzapine: Flexible dose. Allowed dose range: n.i. Mean dose: 15.7 mg/day. N=14.<br/>3. Quetiapine: Flexible dose. Allowed dose range: n.i. Mean dose: 535.7 mg/day. N=14.<br/>4. Risperidone: Flexible dose. Allowed dose range: n.i. Mean dose: 6.7 mg/day. N=14.</p> |

|                                                               |                                                                                                                                                                                                    |                                                                                                                                                                                                                                                                                                                                                                                                  |                                                                                                                                                                                                                                                                                                                                                                                                                                                                                                                                                           |
|---------------------------------------------------------------|----------------------------------------------------------------------------------------------------------------------------------------------------------------------------------------------------|--------------------------------------------------------------------------------------------------------------------------------------------------------------------------------------------------------------------------------------------------------------------------------------------------------------------------------------------------------------------------------------------------|-----------------------------------------------------------------------------------------------------------------------------------------------------------------------------------------------------------------------------------------------------------------------------------------------------------------------------------------------------------------------------------------------------------------------------------------------------------------------------------------------------------------------------------------------------------|
| <p><b>Volavka et al. 2002 (13)</b></p> <p>Neutral sponsor</p> | <p>Allocation: random, no further details.<br/>Blinding: double, identical capsules.<br/>Duration: 14 weeks.<br/>Design: parallel.<br/>Location: multicentre.<br/>Setting: inpatient.</p>          | <p>Diagnosis: (DSM-IV) chronic schizophrenia (n=135) or schizoaffective disorder (n=22), suboptimal response to previous treatment, PANSS of 60 or more. N=167.<br/>Gender: 133 M, 24 F.<br/>Age: 18-60 years, mean=40.8 years.<br/>History: duration ill mean=19.5 years, age at onset: n.i.</p>                                                                                                | <p>1. Clozapine: Flexible dose. Allowed dose range: 200-800 mg/day. Mean dose: 526.6 mg/day (at the end of the last 6 weeks). N=40.</p> <p>2. Haloperidol: Flexible dose. Allowed dose range: 10-30 mg/day. Mean dose: 25.7 mg/day (at the end of the last 6 weeks). N=37.</p> <p>3. Olanzapine Flexible dose. Allowed dose range: 10-40 mg/day. Mean dose: 30.4 mg/day (at the end of the last 6 weeks). N=39.</p> <p>4. Risperidone: Flexible dose. Allowed dose range: 4-16 mg/day. Mean dose: 11.6 mg/day (at the end of the last 6 weeks). N=41.</p> |
| <p><b>Azorin et al. 2001 (44)</b></p> <p>Clozapine</p>        | <p>Allocation: random, no further details.<br/>Blinding: double, no further details.<br/>Duration: 12 weeks.<br/>Design: parallel.<br/>Location: multicentre.<br/>Setting: in- and outpatient.</p> | <p>Diagnosis: (DSM-IV) schizophrenia catatonic (n=4), disorganised (n=46), paranoid (n=140), residual (n=15) or undifferentiated (n=51), poor previous treatment response, CGI of 4 or more, BPRS of 45 or more. N=273.<br/>Gender: 182 M, 74 F.<br/>Age: 18-65 years, mean=38.6 years.<br/>History: duration ill mean n.i., age at onset n.i.</p>                                               | <p>1. Clozapine: Flexible dose. Allowed dose range: 200-900 mg/day. Mean dose: 642 mg/day (of completers, n=100). N=138.</p> <p>2. Risperidone: Flexible dose. Allowed dose range: 2-15 mg/day. Mean dose: 9 mg/day (of completers, n=101). N=135.</p>                                                                                                                                                                                                                                                                                                    |
| <p><b>Bondolfi et al. 1998 (45)</b></p> <p>Risperidone</p>    | <p>Allocation: random, no further details.<br/>Blinding: double, double-dummy protocol.<br/>Duration: 8 weeks.<br/>Design: parallel.<br/>Location: multicentre.<br/>Setting: inpatient.</p>        | <p>Diagnosis: (DSM-III-R) chronic schizophrenia disorganised (n=24), paranoid (n=50), residual (n=5) or undifferentiated (n=7), non-response to, or intolerance of previous antipsychotic treatment, PANSS between 60 and 120. N=86.<br/>Gender: 61 M, 25 F.<br/>Age: 18-65 years, mean=37.3 years.<br/>History: age at first hospitalisation mean=25.5 years, age at onset mean=23.3 years.</p> | <p>1. Clozapine: Flexible dose. Allowed dose range: 0-600 mg/day. Mean dose: 291.2 mg/day (at week 6). N=43.</p> <p>2. Risperidone: Flexible dose. Allowed dose range: 0-12 mg/day. Mean dose: 6.4 mg/day (at week 6). N=43.</p>                                                                                                                                                                                                                                                                                                                          |

|                                                                |                                                                                                                                                                                                    |                                                                                                                                                                                                                                                                                                              |                                                                                                                                                                                                                                                                                                                      |
|----------------------------------------------------------------|----------------------------------------------------------------------------------------------------------------------------------------------------------------------------------------------------|--------------------------------------------------------------------------------------------------------------------------------------------------------------------------------------------------------------------------------------------------------------------------------------------------------------|----------------------------------------------------------------------------------------------------------------------------------------------------------------------------------------------------------------------------------------------------------------------------------------------------------------------|
| <p><b>Breier et al. 1999 (46)</b></p> <p>Neutral sponsor</p>   | <p>Allocation: random, no further details.<br/>Blinding: double, no further details.<br/>Duration: 6 weeks.<br/>Design: parallel.<br/>Location: singlecentre.<br/>Setting: n.i.</p>                | <p>Diagnosis: (DSM-IV) chronic schizophrenia, BPRS positive subscore of 8 or more, SANS of 20 or more, following a baseline fluphenazine treatment. N=29.<br/>Gender: 19 M, 10 F.<br/>Age: 18-55 years, mean =35 years.<br/>History: duration ill mean=12.5 years, age at onset mean =22.5.</p>              | <p>1. Clozapine: Flexible dose. Allowed dose range: 200-600 mg/day. Mean dose: 403.6 mg/day. N=14.<br/>2. Risperidone: Flexible dose. Allowed dose range: 2-9 mg/day. Mean dose: 5.9 mg/day. N=15.</p>                                                                                                               |
| <p><b>Ren et al. 2001 (47)</b></p> <p>Neutral sponsor</p>      | <p>Allocation: random, no further details.<br/>Blinding: double, ball drawing out of box.<br/>Duration: 12 weeks.<br/>Design: parallel.<br/>Location: singlecentre.<br/>Setting: outpatient.</p>   | <p>Diagnosis: (CCMD-3) schizophrenia. N=120.<br/>Gender: n.i. M, n.i. F.<br/>Age: mean=34.5 years.<br/>History: duration ill mean=6.3 years, age at onset mean =22.6 years.</p>                                                                                                                              | <p>1. Clozapine: Allowed dose range: n.i. Mean dose: 350 mg/day. N=60.<br/>2. Risperidone: Allowed dose range: n.i. Mean dose: 3.2 mg/day. N=60.</p>                                                                                                                                                                 |
| <p><b>Zhou et al. 2000 (48)</b></p> <p>Unclear</p>             | <p>Allocation: random, no further details.<br/>Blinding: single, rater-blinded.<br/>Duration: 8 weeks.<br/>Design: parallel.<br/>Location: singlecentre.<br/>Setting: inpatient.</p>               | <p>Diagnosis: (CCMD-2) schizophrenia. N=40.<br/>Gender: 23 M, 17 F.<br/>Age: mean=28.3 years.<br/>History: duration ill mean =3 years, age at onset n.i.</p>                                                                                                                                                 | <p>1. Clozapine: Fixed and flexible dose (first 2 weeks) Allowed dose range: 25-300 mg/day (first 2 weeks), then 300 mg/day fixed. Mean dose: n.i. N=20.<br/>2. Risperidone: Fixed and flexible dose (first 2 weeks). Allowed dose range: 1-6 mg/day (first 2 weeks), then 6 mg/day fixed. Mean dose: n.i. N=20.</p> |
| <p><b>Heinrich et al. 1994 (49)</b></p> <p>Neutral sponsor</p> | <p>Allocation: random, no further details.<br/>Blinding: double, same amount of capsules.<br/>Duration: 4 weeks.<br/>Design: parallel.<br/>Location: multicentre.<br/>Setting: inpatient.</p>      | <p>Diagnosis: (ICD-9) acute schizophrenia catatonic (n=1), disorganised (n=1), paranoid (n=47), unspecified (n=2) or schizoaffective psychosis schizodominant type (n=8) plus (n=1 not specified). N=60.<br/>Gender: 31 M, 28 F.<br/>Age: 18-65 years.<br/>History: duration ill n.i., age at onset n.i.</p> | <p>1. Clozapine: Fixed dose: 400 mg/day. N=20.<br/>2. Risperidone: Fixed dose: 4 mg/day. N=20.<br/>3. Risperidone: Fixed dose: 8 mg/day. N=20.</p>                                                                                                                                                                   |
| <p><b>McGurk et al. 2005 (50)</b></p> <p>Neutral sponsor</p>   | <p>Allocation: random, no further details.<br/>Blinding: double, no further details.<br/>Duration: 29 weeks.<br/>Design: parallel.<br/>Location: multicentre.<br/>Setting: in- and outpatient.</p> | <p>Diagnosis: (DSM-IV) schizophrenia or schizoaffective disorder, treatment resistance, moderate severity score on BPRS or SANS. N=97.<br/>Gender: 77 M, 20 F.<br/>Age: 18-60 years, mean=41.9 years.<br/>History: duration ill n.i., age at onset n.i.</p>                                                  | <p>1. Clozapine: Flexible dose. Allowed dose range: 12.5-800 mg/day (target dose: 500 mg/day from day 28 on). Mean dose: n.i. N=47.<br/>2. Risperidone: Flexible dose. Allowed dose range: 1-16 mg/day (target dose: 6 mg/day from day 15 on). Mean dose: n.i. N=50.</p>                                             |

|                                                     |                                                                                                                                                                                                                       |                                                                                                                                                                                                                                           |                                                                                                                                                                                                     |
|-----------------------------------------------------|-----------------------------------------------------------------------------------------------------------------------------------------------------------------------------------------------------------------------|-------------------------------------------------------------------------------------------------------------------------------------------------------------------------------------------------------------------------------------------|-----------------------------------------------------------------------------------------------------------------------------------------------------------------------------------------------------|
| <b>Wahlbeck et al. 2000 (51)</b><br>Neutral sponsor | Allocation: random, computer-generated randomisation.<br>Blinding: single, rater-blinded.<br>Duration: 10 weeks.<br>Design: parallel.<br>Location: multicentre.<br>Setting: in- and outpatient (initially inpatient). | Diagnosis: (DSM-IV) schizophrenia, resistance to previous treatment. N=20.<br>Gender: 10 M, 9 F.<br>Age: 24-55 years, mean=36.2 years.<br>History: duration ill mean clozapine=12.6 years, mean risperidone=13.1 years, age at onset n.i. | 1. Clozapine: Flexible dose. Allowed dose range: 25-600 mg/day. Mean dose: 385 mg/day. N=11.<br>2. Risperidone: Flexible dose. Allowed dose range: 2-10 mg/day. Mean dose: 7.8 mg/day. N=9.         |
| <b>Daniel et al. 1996 (52)</b><br>Risperidone       | Allocation: random, no further details.<br>Blinding: single, rater-blinded.<br>Duration: 12 weeks (6 weeks observed).<br>Design: cross-over.<br>Location: n.i.<br>Setting: outpatient.                                | Diagnosis: (DSM-III-R) chronic schizophrenia (n=16) or schizoaffective disorder (n=4). N=20.<br>Gender: 7 M, 13 F.<br>Age: 22-51 years, mean=33.8 years.<br>History: duration ill n.i., age at onset mean=22.7 years.                     | 1. Clozapine: Flexible dose. Allowed dose range: 75-800 mg/day. Mean dose: 375 mg/day. N=10.<br>2. Risperidone: Flexible dose. Allowed dose range: 1-10 mg/day. Mean dose: 6.1 mg/day. N=10.        |
| <b>Clozapine versus Sertindole</b>                  |                                                                                                                                                                                                                       |                                                                                                                                                                                                                                           |                                                                                                                                                                                                     |
| No study                                            |                                                                                                                                                                                                                       |                                                                                                                                                                                                                                           |                                                                                                                                                                                                     |
| <b>Clozapine versus Ziprasidone</b>                 |                                                                                                                                                                                                                       |                                                                                                                                                                                                                                           |                                                                                                                                                                                                     |
| <b>Sacchetti et al. 2006 (53)</b><br>Ziprasidone    | Allocation: random, no further details.<br>Blinding: double, no further details.<br>Duration: 18 weeks.<br>Design: parallel.<br>Location: n.i.<br>Setting: n.i.                                                       | Diagnosis: schizophrenia, non-response to, or intolerance of 3 previous antipsychotic treatment trials. N=146.<br>Gender: 101 M, 45 F.<br>Age: mean=40 years.<br>History: duration ill n.i., age at onset n.i.                            | 1. Clozapine: Flexible dose. Allowed dose range: 250-600 mg/day. Mean dose: 345.7 mg/day. N=73.<br>2. Ziprasidone: Flexible dose. Allowed dose range: 80-160 mg/day. Mean dose: 130.4 mg/day. N=73. |
| <b>Clozapine versus Zotepine</b>                    |                                                                                                                                                                                                                       |                                                                                                                                                                                                                                           |                                                                                                                                                                                                     |
| <b>Lin et al. 2003 (54)</b><br>Unclear              | Allocation: random, no further details.<br>Blinding: single, rater-blinded.<br>Duration: 12 weeks.<br>Design: parallel.<br>Location: n.i.<br>Setting: inpatient.                                                      | Diagnosis: schizophrenia, BPRS >30, clozapine treatment for more than 5 months. N=59.<br>Gender: n.i.<br>Age: 20-65 years.<br>History: duration ill n.i., age at onset n.i.                                                               | 1. Clozapine: Flexible dose. Allowed dose range: n.i. Mean dose: 387.1 mg/day. N=24.<br>2. Zotepine: Flexible dose. Allowed dose range: n.i. Mean dose: 377.1 mg/day. N=35.                         |



|                                                          |                                                                                                                                                                                              |                                                                                                                                                                                                                                                                       |                                                                                                                                                                                                                                                                                                                                                                           |
|----------------------------------------------------------|----------------------------------------------------------------------------------------------------------------------------------------------------------------------------------------------|-----------------------------------------------------------------------------------------------------------------------------------------------------------------------------------------------------------------------------------------------------------------------|---------------------------------------------------------------------------------------------------------------------------------------------------------------------------------------------------------------------------------------------------------------------------------------------------------------------------------------------------------------------------|
| <b>Meyer-Lindenberg et al. 1997 (55)</b><br><br>Zotepine | Allocation: random, no further details.<br>Blinding: double, no further details.<br>Duration: 6 weeks.<br>Design: parallel.<br>Location: n.i.<br>Setting: n.i.                               | Diagnosis: (DSM-III-R) schizophrenia catatonic, hebephrenic, paranoid or residual, BPRS >40 after washout phase, no previous treatment with either medication. N=50.<br>Gender: n.i. M, n.i. F.<br>Age: 18-60 years.<br>History: duration ill n.i., age at onset n.i. | 1. Clozapine: Flexible dose. Allowed dose range: 150-450 mg/day. Mean dose: n.i. N=25.<br><br>2. Zotepine: Flexible dose. Allowed dose range: 150-450 mg/day. Mean dose: n.i. N=25.                                                                                                                                                                                       |
| <b>Olanzapine versus Quetiapine</b>                      |                                                                                                                                                                                              |                                                                                                                                                                                                                                                                       |                                                                                                                                                                                                                                                                                                                                                                           |
| <b>Atmaca et al. 2003 (37)</b><br><br>Neutral sponsor    | Allocation: random, no further details.<br>Blinding: single, rater-blinded. Duration: 6 weeks. Design: parallel.<br>Location: singlecentre.<br>Setting: inpatient.                           | Diagnosis: (DSM-IV) schizophrenia. N=56.<br>Gender: 24 M, 29 F.<br>Age: 19-46 years (mean=30.8 years).<br>History: duration ill mean=6.1 years, age at onset n.i.                                                                                                     | 1. Clozapine: Flexible dose. Allowed dose range: n.i. Mean dose: 207.1 mg/day. N=14.<br><br>2. Olanzapine: Flexible dose. Allowed dose range: n.i. Mean dose: 15.7 mg/day. N=14.<br><br>3. Quetiapine: Flexible dose. Allowed dose range: n.i. Mean dose: 535.7 mg/day. N=14.<br><br>4. Risperidone: Flexible dose. Allowed dose range: n.i. Mean dose: 6.7 mg/day. N=14. |
| <b>Kinon et al. 2006 (56)</b><br><br>Olanzapine          | Allocation: random, computer-generated randomisation.<br>Blinding: double, identical capsules.<br>Duration: 26 weeks.<br>Design: parallel.<br>Location: multicentre.<br>Setting: outpatient. | Diagnosis: (DSM-IV) schizophrenia (n=230), schizoaffective disorder (n=116), prominent negative symptoms. N=346.<br>Gender: 228 M, 118 F.<br>Age: mean=41.1 years,<br>History: duration ill mean=20.5 years                                                           | 1. Olanzapine Flexible dose. Allowed dose range: 10-20 mg/day. Mean dose: 15.6 mg/day. N=171.<br><br>2. Quetiapine Flexible dose Allowed dose range: 300-700 mg/day. Mean dose: 455.8 mg/day. N=175.                                                                                                                                                                      |
| <b>Riedel et al. 2007 (57)</b><br><br>Olanzapine         | Allocation: random, no further details,<br>Blinding: double<br>Duration: 8 week<br>Design: parallel<br>Setting: inpatient                                                                    | Diagnosis: (DSM-IV) schizophrenia, acute episode ( N= 52, 33 observed)<br>Gender: 21 M/ 12 F<br>Age: 18-65 years, mean = 35.6 years,<br>History duration ill mean= 6.6 years                                                                                          | 1. Olanzapine:flexible Allowed dose range: 10-20mg Mean Dose: 15,82 mg. N= 17<br><br>2. Quetiapine: flexible Allowed Dose range 400-800 mg Mean dose 586,86 mg. N= 16                                                                                                                                                                                                     |

|                                                                 |                                                                                                                                                                                                                                                                                                                                     |                                                                                                                                                                                                                                  |                                                                                                                                                                                                                                                                                                                                                                                                                                                                                                                                         |
|-----------------------------------------------------------------|-------------------------------------------------------------------------------------------------------------------------------------------------------------------------------------------------------------------------------------------------------------------------------------------------------------------------------------|----------------------------------------------------------------------------------------------------------------------------------------------------------------------------------------------------------------------------------|-----------------------------------------------------------------------------------------------------------------------------------------------------------------------------------------------------------------------------------------------------------------------------------------------------------------------------------------------------------------------------------------------------------------------------------------------------------------------------------------------------------------------------------------|
| <p><b>Lieberman et al. 2005 (58)</b></p> <p>Neutral sponsor</p> | <p>Allocation: random, no further details.<br/>Blinding: double, identical capsules.<br/>Duration: 78 weeks.<br/>Design: parallel.<br/>Location: multicentre.<br/>Setting: in- and outpatient.</p>                                                                                                                                  | <p>Diagnosis: (DSM-IV) schizophrenia, previously more than one schizophrenic episode, responder. N=1493.<br/>Gender: 1080 M, 380 F.<br/>Age: 18-65 years, mean=40.6 years.<br/>History: duration ill n.i., age at onset n.i.</p> | <p>1. Olanzapine: Flexible dose. Allowed dose range: 7.5-30 mg/day. Mean dose: 20.1 mg/day. N=336.</p> <p>2. Perphenazine: Flexible dose. Allowed dose range: 8-32 mg/day. Mean dose: 20.8 mg/day. N=261.</p> <p>3. Quetiapine: Flexible dose. Allowed dose range: 200-800 mg/day. Mean dose: 543.4 mg/day. N=337.</p> <p>4. Risperidone: Flexible dose. Allowed dose range: 1.5-6.0 mg/day. Mean dose: 3.9 mg/day. N=341.</p> <p>5. Ziprasidone: Flexible dose. Allowed dose range: 40-160 mg/day. Mean dose: 112.8 mg/day. N=185.</p> |
| <p><b>Stroup et al. 2006 (59)</b></p> <p>Neutral sponsor</p>    | <p>Allocation: random, 2 steps of randomisation before and after availability of ziprasidone, subjects received other medication than in previous phase 1 treatment. Re-randomised.<br/>Blinding: double, identical capsules.<br/>Duration: 26 weeks.<br/>Design: parallel.<br/>Location: n.i.<br/>Setting: in- and outpatient.</p> | <p>Diagnosis: (DSM-IV) chronic schizophrenia. N=444.<br/>Gender: 308 M, 136 F.<br/>Age: 18-65 years, mean=40.9 years.<br/>History: duration ill n.i., age at onset n.i.</p>                                                      | <p>1. Olanzapine: Flexible dose. Allowed dose range: 7.5-30 mg/day. Mean dose: 20.5 mg/day. N=68.</p> <p>2. Quetiapine: Flexible dose. Allowed dose range: 200-800 mg/day. Mean dose: 565.2 mg/day. N=63.</p> <p>3. Risperidone: Flexible dose. Allowed dose range: 1.5-6.0 mg/day. Mean dose: 4.1 mg/day. N=70.</p> <p>4. Ziprasidone: Flexible dose. Allowed dose range: 40-160 mg/day. Mean dose: 115.9 mg/day. N=137.</p>                                                                                                           |
| <p><b>Sirota et al. 2006 (60)</b></p> <p>Quetiapine</p>         | <p>Allocation: random, no further details.<br/>Blinding: single, rater-blinded.<br/>Duration: 12 weeks.<br/>Design: parallel.<br/>Location: singlecentre.<br/>Setting: inpatient.</p>                                                                                                                                               | <p>Diagnosis: (DSM-IV) schizophrenia, PANSS negative subscore &gt;15, SANS &gt;60. N=40.<br/>Gender: 32 M, 8 F.<br/>Age: 21-64 years, mean=37.2 years<br/>History: duration ill mean=14.6 years, age at onset n.i.</p>           | <p>1. Olanzapine: Flexible dose. Allowed dose range: 5-20 mg/day. Mean dose: 16.0 mg/day. N=21.</p> <p>2. Quetiapine: Flexible dose. Allowed dose range: 200-800 mg/day. Mean dose: 637.2 mg/day. N=19.</p>                                                                                                                                                                                                                                                                                                                             |

|                                                               |                                                                                                                                                                                                                   |                                                                                                                                                                                                                                                                                                                                                                      |                                                                                                                                                                                                                                                                                                                                                                                                               |
|---------------------------------------------------------------|-------------------------------------------------------------------------------------------------------------------------------------------------------------------------------------------------------------------|----------------------------------------------------------------------------------------------------------------------------------------------------------------------------------------------------------------------------------------------------------------------------------------------------------------------------------------------------------------------|---------------------------------------------------------------------------------------------------------------------------------------------------------------------------------------------------------------------------------------------------------------------------------------------------------------------------------------------------------------------------------------------------------------|
| <p><b>Švestka et al. 2003 (61)</b></p> <p>Neutral sponsor</p> | <p>Allocation: random, no further details.<br/>Blinding: double, no further details.<br/>Duration: 6 weeks.<br/>Design: parallel.<br/>Location: n.i.<br/>Setting: inpatient.</p>                                  | <p>Diagnosis: (ICD-10) acute schizophrenia (n=32), schizoaffective disorder (n=10). N=42.<br/>Gender: 0 M, 42 F.<br/>Age: mean=35.78 years.<br/>History: duration ill mean=7.05 years, age at onset n.i.</p>                                                                                                                                                         | <p>1. Olanzapine: Flexible dose. Allowed dose range: 10-20 mg/day. Mean dose: 19.5 mg/day. N=20.<br/>2. Quetiapine: Flexible dose. Allowed dose range: 50-700 mg/day. Mean dose: 677.3 mg/day. N=22.</p>                                                                                                                                                                                                      |
| <p><b>Ozguven et al. 2004 (62)</b></p> <p>Neutral sponsor</p> | <p>Allocation: random, no further details<br/>Blinding: single<br/>Duration: 6 weeks<br/>Design: parallel<br/>Location, Setting: n.i.</p>                                                                         | <p>Diagnosis: (DSM-IV) schizophrenia<br/>Gender: 8M, 22F.<br/>Age, history, duration ill: not indicated</p>                                                                                                                                                                                                                                                          | <p>1. Olanzapine: Mean dose: 20.0mg/day. N= 15<br/>2. Quetiapine: Mean dose: 833,3 mg/day. N= 15</p>                                                                                                                                                                                                                                                                                                          |
| <p><b>McEvoy et al. 2007 (63)</b></p> <p>Quetiapine</p>       | <p>Allocation: random, no further details.<br/>Blinding: double, no further details.<br/>Duration: 52 weeks.<br/>Design: parallel.<br/>Location: multicentre.<br/>Setting: n.i.</p>                               | <p>Diagnosis: (DSM-IV) schizophrenia (n=231), schizophreniform disorder (n=115) or schizoaffective disorder (n=54), first episode, psychotic symptoms for 1 month to 5 years, PANSS psychosis and CGI-S score of 4 or more. N=400.<br/>Gender: 292 M, 108 F.<br/>Age: 16-40 years, mean=24.5 years.<br/>History: duration ill mean=1.08 years, age at onset n.i.</p> | <p>1. Olanzapine: Flexible dose. Allowed dose range: 2.5-20 mg/day. Mean dose: 11.7 mg/day. N=133.<br/>2. Quetiapine: Flexible dose. Allowed dose range: 100-800 mg/day. Mean dose: 506 mg/day. N=134.<br/>3. Risperidone: Flexible dose. Allowed dose range: 0.5-4 mg/day. Mean dose: 2.4 mg/day. N=133.</p>                                                                                                 |
| <p><b>Mori et al. 2004 (64)</b></p> <p>Unclear</p>            | <p>Allocation: random, no further details.<br/>Blinding: double, no further details.<br/>Duration: 8 weeks (last 4 weeks observed).<br/>Design: parallel.<br/>Location: singlecentre.<br/>Setting: inpatient.</p> | <p>Diagnosis: (DSM-IV) schizophrenia disorganised (n=23), paranoid (n=10), undifferentiated (n=34). N=77.<br/>Gender: 39 M, 38 F.<br/>Age: 28-84 years, mean=59.9 years.<br/>History: duration ill mean=34.51 years, age at onset n.i.</p>                                                                                                                           | <p>1. Olanzapine: Flexible dose. Allowed dose range: 2.5-20 mg/day. Mean dose: 16.5 mg/day. N=20.<br/>2. Perospirone: Flexible dose. Allowed dose range: 4-48 mg/day. Mean dose: 37.3 mg/day. N=18.<br/>3. Quetiapine: Flexible dose. Allowed dose range: 50-750 mg/day. Mean dose: 432.5 mg/day. N=20.<br/>4. Risperidone: Flexible dose. Allowed dose range: 1-12 mg/day. Mean dose: 7.37 mg/day. N=19.</p> |

|                                                            |                                                                                                                                                                                                                                                      |                                                                                                                                                                                                                                                                      |                                                                                                                                                                                                                                                                                                                    |
|------------------------------------------------------------|------------------------------------------------------------------------------------------------------------------------------------------------------------------------------------------------------------------------------------------------------|----------------------------------------------------------------------------------------------------------------------------------------------------------------------------------------------------------------------------------------------------------------------|--------------------------------------------------------------------------------------------------------------------------------------------------------------------------------------------------------------------------------------------------------------------------------------------------------------------|
| <p><b>McEvoy et al. 2006 (65)</b></p> <p>Neutral</p>       | <p>Allocation: random, no further details.<br/>Blinding: double, identical capsules.<br/>Duration: 52 weeks (26 weeks observed, because of small group sizes).<br/>Design: parallel.<br/>Location: multicentre.<br/>Setting: in- and outpatient.</p> | <p>Diagnosis: (DSM-IV) schizophrenia, inadequate efficacy in previous study, clozapine treatment (n=49) was open-label. N=99 (observed N=50).<br/>Gender: 80 M, 19 F.<br/>Age: 18-65 years (mean=39.7 years).<br/>History: duration ill n.i., age at onset: n.i.</p> | <p>1. Olanzapine: Flexible dose. Allowed dose range: 7.5-30 mg/day. Mean dose: 23.4 mg/day. N=19.</p> <p>2. Quetiapine: Flexible dose. Allowed dose range: 200-800 mg/day. Mean dose: 642.9 mg/day. N=15.</p> <p>3. Risperidone: Flexible dose. Allowed dose range: 1.5-6 mg/day. Mean dose: 4.8 mg/day. N=16.</p> |
| <p><b>Voruganti et al 2007 (66)</b></p> <p>Quetiapine</p>  | <p>Allocation: random, no further details.<br/>Blinding: single, rater-blinded<br/>Duration: 52 weeks<br/>Design: parallel</p>                                                                                                                       | <p>Diagnosis: schizophrenia, N= 86, no further details</p>                                                                                                                                                                                                           | <p>1. Olanzapine: Flexible dose: Mean Dose: 17,2 mg/day. N=42</p> <p>2. Quetiapine: Flexible Dose. Mean Dose: 612, 8 mg/day. N=43</p>                                                                                                                                                                              |
| <p><b>Sacchetti et al. 2004 (67)</b></p> <p>Quetiapine</p> | <p>Allocation: random, no further details.<br/>Blinding: single (rater-blinded).<br/>Duration: 16 weeks (8 weeks observed).<br/>Design: parallel.<br/>Location: multicentre.<br/>Setting: inpatient.</p>                                             | <p>Diagnosis: (DSM-IV) schizophrenia, PANSS total score of 70 or more, PANSS positive subscore of 4 or more on at least 2 items N=75<br/>Age: 18-65 years<br/>History: duration ill n.i., age at onset n.i.</p>                                                      | <p>1. Olanzapine: Flexible dose. Allowed dose range: 10-20 mg/day. Mean dose: 14.6 mg/day. N=25</p> <p>2. Quetiapine: Flexible dose. Allowed dose range: 400-800 mg/day. Mean dose: 602.4 mg/day. N=25</p> <p>3. Risperidone: Flexible dose. Allowed dose range: 4-8 mg/day. Mean dose: 4.3 mg/day. N=25</p>       |

## Olanzapine versus Risperidone

|                                                           |                                                                                                                                                                                                    |                                                                                                                                                                            |                                                                                                                                                                                                                                                                                                                                                                         |
|-----------------------------------------------------------|----------------------------------------------------------------------------------------------------------------------------------------------------------------------------------------------------|----------------------------------------------------------------------------------------------------------------------------------------------------------------------------|-------------------------------------------------------------------------------------------------------------------------------------------------------------------------------------------------------------------------------------------------------------------------------------------------------------------------------------------------------------------------|
| <p><b>Atmaca et al. 2003 (37)</b><br/>Neutral sponsor</p> | <p>Allocation: random, no further details.<br/>Blinding: single, rater-blinded.<br/>Duration: 6 weeks.<br/>Design: parallel.<br/>Location: singlecentre.<br/>Setting: inpatient.</p>               | <p>Diagnosis: (DSM-IV) schizophrenia. N=56.<br/>Gender: 24 M, 29 F.<br/>Age: 19-46 years, mean=30.8 years.<br/>History: duration ill mean=6.1 years, age at onset n.i.</p> | <p>1. Clozapine: Flexible dose. Allowed dose range: n.i. Mean dose: 207.1 mg/day. N=14.<br/>2. Olanzapine: Flexible dose. Allowed dose range: n.i. Mean dose: 15.7 mg/day. N=14.<br/>3. Quetiapine: Flexible dose. Allowed dose range: n.i. Mean dose: 535.7 mg/day. N=14.<br/>4. Risperidone: Flexible dose. Allowed dose range: n.i. Mean dose: 6.7 mg/day. N=14.</p> |
| <p><b>Canive et al. 2000 (68)</b><br/>Olanzapine</p>      | <p>Allocation: random<br/>Blinding: double<br/>Duration: 18 weeks, first 8 week treatment period observed<br/>Design: cross-over<br/>Location: not indicated<br/>Setting: inpatient/outpatient</p> | <p>Diagnosis: (DSM-IV) schizophrenia N= 15<br/>Age 18-65 years, mean =42 years<br/>History, duration ill: n. i</p>                                                         | <p>1. Olanzapine: fixed, 15 mg/day. N= 5<br/>2. Risperidone: fixed 6mg/day N= 4</p>                                                                                                                                                                                                                                                                                     |
| <p><b>Wynn et al. 2007 (69)</b><br/>Risperidone</p>       | <p>Allocation: random<br/>Blinding: double<br/>Duration: 8 weeks<br/>Design: parallel<br/>Location: not indicated<br/>Setting: inpatient/outpatient</p>                                            | <p>Diagnosis: (DSM-IV) schizophrenia N= 51<br/>Age 18-60 years, mean age 48,8 years.<br/>History, duration ill: n. i.</p>                                                  | <p>1. Olanzapine: fixed, 15 mg/day N= 21<br/>2. Risperidone: fixed 4mg/day. N= 19<br/>3. Haloperidol: fixed 8mg/day. N= 11</p>                                                                                                                                                                                                                                          |

|                                                               |                                                                                                                                                                                                                   |                                                                                                                                                                                                                                                                                                                                                                                  |                                                                                                                                                                                                                                                                                                                                                                                                                                                                                                                                                            |
|---------------------------------------------------------------|-------------------------------------------------------------------------------------------------------------------------------------------------------------------------------------------------------------------|----------------------------------------------------------------------------------------------------------------------------------------------------------------------------------------------------------------------------------------------------------------------------------------------------------------------------------------------------------------------------------|------------------------------------------------------------------------------------------------------------------------------------------------------------------------------------------------------------------------------------------------------------------------------------------------------------------------------------------------------------------------------------------------------------------------------------------------------------------------------------------------------------------------------------------------------------|
| <p><b>Volavka et al. 2002 (13)</b></p> <p>Neutral sponsor</p> | <p>Allocation: random, no further details.<br/>Blinding: double, identical capsules.<br/>Duration: 14 weeks.<br/>Design: parallel.<br/>Location: multicentre.<br/>Setting: inpatient</p>                          | <p>Diagnosis: (DSM-IV) chronic schizophrenia (n=135) or schizoaffective disorder (n=22), suboptimal response to previous treatment, PANSS of 60 or more. N=167.<br/>Gender: 133 M, 24 F<br/>Age: 18-60 years, mean=40.8 years<br/>History: duration ill mean=19.5 years, age at onset n.i.</p>                                                                                   | <p>1. Clozapine: Flexible dose. Allowed dose range: 200-800 mg/day. Mean dose: 526.6 mg/day (at the end of the last 6 weeks). N=40.</p> <p>2. Haloperidol: Flexible dose. Allowed dose range: 10-30 mg/day. Mean dose: 25.7 mg/day (at the end of the last 6 weeks). N=37.</p> <p>3. Olanzapine: Flexible dose. Allowed dose range: 10-40 mg/day. Mean dose: 30.4 mg/day (at the end of the last 6 weeks). N=39.</p> <p>4. Risperidone: Flexible dose. Allowed dose range: 4-16 mg/day. Mean dose: 11.6 mg/day (at the end of the last 6 weeks). N=41.</p> |
| <p><b>McEvoy et al. 2007 (63)</b></p> <p>Quetiapine</p>       | <p>Allocation: random, no further details.<br/>Blinding: double, no further details.<br/>Duration: 52 weeks.<br/>Design: parallel.<br/>Location: multicentre.<br/>Setting: n.i.</p>                               | <p>Diagnosis: (DSM-IV) schizophrenia (n=231), schizophreniform disorder (n=115) or schizoaffective disorder (n=54), first episode, psychotic symptoms for 1 month to 5 years, PANSS psychosis and CGI-S score of 4 or more. N=400.<br/>Gender: 292 M, 108 F.<br/>Age: 16-40 years, mean=24.5 years.<br/>History: duration ill mean risperidone=1.08 years, age at onset n.i.</p> | <p>1. Olanzapine: Flexible dose. Allowed dose range: 2.5-20 mg/day. Mean dose: 11.7 mg/day. N=133.</p> <p>2. Quetiapine: Flexible dose. Allowed dose range: 100-800 mg/day. Mean dose: 506 mg/day. N=134.</p> <p>3. Risperidone: Flexible dose. Allowed dose range: 0.5-4 mg/day. Mean dose: 2.4 mg/day. N=133.</p>                                                                                                                                                                                                                                        |
| <p><b>Mori et al. 2004 (64)</b></p> <p>Unclear</p>            | <p>Allocation: random, no further details.<br/>Blinding: double, no further details.<br/>Duration: 8 weeks (last 4 weeks observed).<br/>Design: parallel.<br/>Location: singlecentre.<br/>Setting: inpatient.</p> | <p>Diagnosis: (DSM-IV) schizophrenia disorganised (n=23), paranoid (n=10), undifferentiated (n=34). N=77.<br/>Gender: 39 M, 38 F.<br/>Age: 28-84 years, mean=59.9 years.<br/>History: duration ill mean=34.51 years, age at onset n.i.</p>                                                                                                                                       | <p>1. Olanzapine: Flexible dose. Allowed dose range: 2.5-20 mg/day. Mean dose: 16.5 mg/day. N=20.</p> <p>2. Perospirone: Flexible dose. Allowed dose range: 4-48 mg/day. Mean dose: 37.3 mg/day. N=18.</p> <p>3. Quetiapine: Flexible dose. Allowed dose range: 50-750 mg/day. Mean dose: 432.5 mg/day. N=20.</p> <p>4. Risperidone: Flexible dose. Allowed dose range: 1-12 mg/day. Mean dose: 7.37 mg/day. N=19.</p>                                                                                                                                     |

|                                                              |                                                                                                                                                                                                                                                     |                                                                                                                                                                                                                                                                                |                                                                                                                                                                                                                                                                                                                    |
|--------------------------------------------------------------|-----------------------------------------------------------------------------------------------------------------------------------------------------------------------------------------------------------------------------------------------------|--------------------------------------------------------------------------------------------------------------------------------------------------------------------------------------------------------------------------------------------------------------------------------|--------------------------------------------------------------------------------------------------------------------------------------------------------------------------------------------------------------------------------------------------------------------------------------------------------------------|
| <p><b>McEvoy et al. 2006 (65)</b></p> <p>Neutral sponsor</p> | <p>Allocation: random, no further details.<br/>Blinding: double, identical capsules.<br/>Duration: 52 weeks (26 weeks observed, because of small group size).<br/>Design: parallel.<br/>Location: multicentre.<br/>Setting: in- and outpatient.</p> | <p>Diagnosis: (DSM-IV) schizophrenia, inadequate efficacy in previous study, clozapine treatment (n=49) was open-label. N=99.<br/>Gender: 80 M, 19 F.<br/>Age: 18-65 years, mean=39.7 years.<br/>History: duration ill n.i., age at onset n.i.</p>                             | <p>1. Olanzapine: Flexible dose. Allowed dose range: 7.5-30 mg/day. Mean dose: 23.4 mg/day. N=19.</p> <p>2. Quetiapine: Flexible dose. Allowed dose range: 200-800 mg/day. Mean dose: 642.9 mg/day. N=15.</p> <p>3. Risperidone: Flexible dose. Allowed dose range: 1.5-6 mg/day. Mean dose: 4.8 mg/day. N=16.</p> |
| <p><b>Sacchetti et al. 2004 (67)</b></p> <p>Quetiapine</p>   | <p>Allocation: random, no further details.<br/>Blinding: single (rater-blinded).<br/>Duration: 16 weeks (8 weeks observed).<br/>Design: parallel.<br/>Location: multicentre.<br/>Setting: inpatient.</p>                                            | <p>Diagnosis: (DSM-IV) schizophrenia, PANSS total score of 70 or more, PANSS positive subscore of 4 or more on at least 2 items N=75<br/>Age: 18-65 years<br/>History: duration ill n.i., age at onset n.i.</p>                                                                | <p>1. Olanzapine: Flexible dose. Allowed dose range: 10-20 mg/day. Mean dose: 14.6 mg/day N=25</p> <p>2. Quetiapine: Flexible dose. Allowed dose range: 400-800 mg/day. Mean dose: 602.4 mg/day N=25</p> <p>3. Risperidone: Flexible dose. Allowed dose range: 4-8 mg/day. Mean dose: 4.3 mg/day N=25</p>          |
| <p><b>Conley et al. 2001 (70)</b></p> <p>Risperidone</p>     | <p>Allocation: random, stratified by site.<br/>Blinding: double, no further details.<br/>Duration: 8 weeks.<br/>Design: parallel.<br/>Location: multicentre.<br/>Setting: in- and outpatient.</p>                                                   | <p>Diagnosis: (DSM-IV) schizophrenia (n=325) paranoid (n=213) or schizoaffective disorder (n=52), PANSS between 60 and 120. N=377.<br/>Gender: 274 M, 103 F.<br/>Age: 18-64 years, mean=40.0 years.<br/>History: duration ill mean=16 years, age at onset mean=24.1 years.</p> | <p>1. Olanzapine: Flexible dose. Allowed dose range: 5-20 mg/day. Mean dose: 13.1 mg/day. N=189.</p> <p>2. Risperidone: Flexible dose. Allowed dose range: 2-6 mg/day. Mean dose: 4.7 mg/day. N=188.</p>                                                                                                           |
| <p><b>Dollfus et al. 2005 (71)</b></p> <p>Olanzapine</p>     | <p>Allocation: random, no further details.<br/>Blinding: double, no further details.<br/>Duration: 8 weeks.<br/>Design: parallel.<br/>Location: multicentre.<br/>Setting: n.i.</p>                                                                  | <p>Diagnosis: (DSM-IV) schizophrenia with post-psychotic depression. PANSS positive subscore of 28 or less N=76.<br/>Gender: 53 M, 23 F.<br/>Age: 18-65 years, mean=39.3 years.<br/>History: duration ill n.i., age at onset n.i.</p>                                          | <p>1. Olanzapine: Flexible dose. Allowed dose range: 5-15 mg/day. Mean dose: n.i. N=36</p> <p>2. Risperidone: Flexible dose. Allowed dose range: 4-8 mg/day. Mean dose: n.i. N=40.</p>                                                                                                                             |

|                                              |                                                                                                                                                                                                       |                                                                                                                                                                                                                                                     |                                                                                                                                                                                                                                                                                                 |
|----------------------------------------------|-------------------------------------------------------------------------------------------------------------------------------------------------------------------------------------------------------|-----------------------------------------------------------------------------------------------------------------------------------------------------------------------------------------------------------------------------------------------------|-------------------------------------------------------------------------------------------------------------------------------------------------------------------------------------------------------------------------------------------------------------------------------------------------|
| <b>Gureje et al. 2003 (72)</b><br>Olanzapine | Allocation: random, computer-generated randomisation.<br>Blinding: double, double-dummy design.<br>Duration: 30 weeks.<br>Design: parallel.<br>Location: multicentre.<br>Setting: in- and outpatient. | Diagnosis: (DSM-IV) schizophrenia, schizoaffective disorder or schizophreniform disorder, BPRS total score of 36 or more. N=65.<br>Gender: 38 M, 27 F.<br>Age: 18 years or more, mean =35.2 years.<br>History: duration ill n.i., age at onset n.i. | 1. Olanzapine: Flexible dose. Allowed dose range: 10-20 mg/day. Mean dose: 17.2 mg/day. N=32.<br>2. Risperidone: Flexible dose. Allowed dose range: 4-8 mg/day. Mean dose: 6.6 mg/day. N=33.                                                                                                    |
| <b>Jeste et al. 2003 (73)</b><br>Risperidone | Allocation: random, no further details.<br>Blinding: double, no further details.<br>Duration: 8 weeks.<br>Design: parallel.<br>Location: multicentre.<br>Setting: in- and outpatient                  | Diagnosis: (DSM-IV) schizophrenia (n=149) or schizoaffective disorder (n=26), PANSS between 50 and 120. N=176.<br>Gender: 62 M, 113 F.<br>Age: 60 years or more, mean =71.2 years.<br>History: duration ill mean=34.7 years.                        | 1. Olanzapine: Flexible dose. Allowed dose range: 5-20 mg/day. Mean dose: 11.1 mg/day. N=89.<br>2. Risperidone: Flexible dose. Allowed dose range: 1-3 mg/day. Mean dose: 1.9 mg/day. N=87.                                                                                                     |
| <b>Keefe et al. 2006 (74)</b><br>Olanzapine  | Allocation: random, no further details.<br>Blinding: double, no further details.<br>Duration: 52 weeks.<br>Design: parallel.<br>Location: multicentre.<br>Setting: in- and outpatient.                | Diagnosis: (DSM-IV) schizophrenia or schizoaffective disorder. N=414.<br>Gender: 282 M, 132 F.<br>Age: 18-55 years, mean=39 years.<br>History: duration ill n.i., age at onset n.i.                                                                 | 1. Haloperidol: Flexible dose. Allowed dose range: 2-19 mg/day. Mean dose: 8.2 mg/day. N=97.<br>2. Olanzapine: Flexible dose. Allowed dose range: 5-20 mg/day. Mean dose: 12.3 mg/day. N=159.<br>3. Risperidone: Flexible dose. Allowed dose range: 2-10 mg/day. Mean dose: 5.2 mg/day. N=158.  |
| <b>Purdon et al. 2000 (75)</b><br>Olanzapine | Allocation: random, computer-generated randomisation.<br>Blinding: double, no further details.<br>Duration: 54 weeks.<br>Design: parallel.<br>Location: multicentre.<br>Setting: outpatient.          | Diagnosis: (DSM-IV) schizophrenia, in early phase. N=65.<br>Gender: 46 M, 19 F.<br>Age: 18-65 years, mean=28.9 years.<br>History: duration ill mean=2.6 years, age at onset mean=25.5 years.                                                        | 1. Haloperidol: Flexible dose. Allowed dose range: 5-20 mg/day. Mean dose: 9.70 mg/day. N=23.<br>2. Olanzapine: Flexible dose. Allowed dose range: 5-20 mg/day. Mean dose: 11.00 mg/day. N=21.<br>3. Risperidone: Flexible dose. Allowed dose range: 4-10 mg/day. Mean dose: 6.00 mg/day. N=21. |



|                                                         |                                                                                                                                                                                                         |                                                                                                                                                                                                                                                                                                                                                                                                                                                                                       |                                                                                                                                                                                                                                                                                                        |
|---------------------------------------------------------|---------------------------------------------------------------------------------------------------------------------------------------------------------------------------------------------------------|---------------------------------------------------------------------------------------------------------------------------------------------------------------------------------------------------------------------------------------------------------------------------------------------------------------------------------------------------------------------------------------------------------------------------------------------------------------------------------------|--------------------------------------------------------------------------------------------------------------------------------------------------------------------------------------------------------------------------------------------------------------------------------------------------------|
| <b>Robinson et al. 2005 (76)</b><br><br>Neutral sponsor | Allocation: random, no further details.<br>Blinding: single, rater-blinded.<br>Duration: 16 weeks.<br>Design: parallel.<br>Location: multicentre.<br>Setting: n.i.                                      | Diagnosis: (DSM-IV) first episode schizophrenia (n=84), schizophreniform disorder (n=19) or schizoaffective disorder (n=9). N=120.<br>Gender: 78 M, 34 F.<br>Age: 16-40 years, mean=23.3 years .<br>History: duration ill mean=2.2 years, age at onset mean=20.7 years.                                                                                                                                                                                                               | 1. Olanzapine: Flexible dose. Allowed dose range: 2.5-20 mg/day. Mean dose: 11.8 mg/day. N=60.<br><br>2. Risperidone: Flexible dose. Allowed dose range: 1-6 mg/day. Mean dose: 3.9 mg/day. N=60.                                                                                                      |
| <b>Sikich et al. 2004 (77)</b><br><br>Neutral sponsor   | Allocation: random, computer-generated randomisation.<br>Blinding: double, no further details.<br>Duration: 8 weeks.<br>Design: parallel.<br>Location: multicentre.<br>Setting: in- and outpatient      | Diagnosis: (K-SADS-P or DSM-IV) schizophrenia, schizoaffective disorder, schizophreniform disorder, delusional disorder, major depression with psychotic features or bipolar affective disorder with psychotic features, schizophrenia spectrum (n=26), affective disorders (n=24) subjects selected because of prominent positive psychotic symptoms. N=51.<br>Gender: 30 M, 21 F.<br>Age: 8-19 years, mean=14.8 years.<br>History: duration ill n.i., age at onset mean=12.4 years. | 1. Haloperidol: Flexible dose. Allowed dose range: 1-8 mg/day. Mean dose: 5.0 mg/day. N=15.<br><br>2. Olanzapine: Flexible dose. Allowed dose range: 2.5-20 mg/day. Mean dose: 12.3 mg/day. N=16.<br><br>3. Risperidone: Flexible dose. Allowed dose range: 0.5-6 mg/day. Mean dose: 4.0 mg/day. N=20. |
| <b>Tran et al. 1997 (78)</b><br><br>Olanzapine          | Allocation: random, no further details.<br>Blinding: double, no further details.<br>Duration: 28 weeks.<br>Design: parallel.<br>Location: multicentre.<br>Setting: in- and outpatient.                  | Diagnosis: (DSM-IV) schizophrenia (n=277), schizophreniform disorder, schizoaffective disorder, BPRS score of 42 or more. N=339.<br>Gender: 220 M, 119 F.<br>Age: 18-65 years, mean=36.21 years.<br>History: duration ill n.i., age at onset mean=23.7 years.                                                                                                                                                                                                                         | 1. Olanzapine: Flexible dose. Allowed dose range: 10-20 mg/day. Mean dose: 17.2 mg/day. N=172.<br><br>2. Risperidone: Flexible dose. Allowed dose range: 4-12 mg/day. Mean dose: 7.2 mg/day. N=167.                                                                                                    |
| <b>van Nimwegen et al. 2006 (79)</b><br><br>Olanzapine  | Allocation: random, no further details.<br>Blinding: double, no further details.<br>Duration: 6 weeks.<br>Design: parallel.<br>Location: n.i.<br>Setting: n.i.                                          | Diagnosis: (DSM-IV) schizophrenia, schizophreniform disorder or schizoaffective disorder, all first episode N=131.<br>Gender: 106 M, 25 F.<br>Age: mean =24.75 years.<br>History: duration ill n.i., age at onset n.i.                                                                                                                                                                                                                                                                | 1. Olanzapine: Flexible dose. Allowed dose range: 5-20 mg/day. Mean dose: 10.95 mg/day. N=64.<br><br>2. Risperidone: Flexible dose. Allowed dose range: 1-5 mg/day. Mean dose: 2.96 mg/day. N=67.                                                                                                      |
| <b>Wang et al. 2006 (80)</b><br><br>Risperidone         | Allocation: random, no further details.<br>Blinding: double, identical capsules.<br>Duration: 22 weeks (last 12 weeks observed).<br>Design: parallel.<br>Location: multicentre.<br>Setting: outpatient. | Diagnosis: (DSM-IV) schizophrenia (n=24), schizoaffective disorder (n=12). N=36.<br>Gender: 17 M, 19 F.<br>Age: mean=47.0 years.<br>History: duration ill n.i., age at onset n.i.                                                                                                                                                                                                                                                                                                     | 1. Olanzapine: Flexible dose. Allowed dose range: n.i. Mean dose: 13.8 mg/day. N=17.<br><br>2. Risperidone: Flexible dose. Allowed dose range: n.i. Mean dose: 5.3 mg/day. N=19.                                                                                                                       |

|                                                                 |                                                                                                                                                                                                                                                                                                                                     |                                                                                                                                                                                                                                  |                                                                                                                                                                                                                                                                                                                                                                                                                                                                                                                                         |
|-----------------------------------------------------------------|-------------------------------------------------------------------------------------------------------------------------------------------------------------------------------------------------------------------------------------------------------------------------------------------------------------------------------------|----------------------------------------------------------------------------------------------------------------------------------------------------------------------------------------------------------------------------------|-----------------------------------------------------------------------------------------------------------------------------------------------------------------------------------------------------------------------------------------------------------------------------------------------------------------------------------------------------------------------------------------------------------------------------------------------------------------------------------------------------------------------------------------|
| <p><b>Lieberman et al. 2005 (58)</b></p> <p>Neutral sponsor</p> | <p>Allocation: random, no further details.<br/>Blinding: double, identical capsules.<br/>Duration: 78 weeks.<br/>Design: parallel.<br/>Location: multicentre.<br/>Setting: in- and outpatient.</p>                                                                                                                                  | <p>Diagnosis: (DSM-IV) schizophrenia, previously more than one schizophrenic episode, responder. N=1493.<br/>Gender: 1080 M, 380 F.<br/>Age: 18-65 years, mean=40.6 years.<br/>History: duration ill n.i., age at onset n.i.</p> | <p>1. Olanzapine: Flexible dose. Allowed dose range: 7.5-30 mg/day. Mean dose: 20.1 mg/day. N=336.</p> <p>2. Perphenazine: Flexible dose. Allowed dose range: 8-32 mg/day. Mean dose: 20.8 mg/day. N=261.</p> <p>3. Quetiapine: Flexible dose. Allowed dose range: 200-800 mg/day. Mean dose: 543.4 mg/day. N=337.</p> <p>4. Risperidone: Flexible dose. Allowed dose range: 1.5-6.0 mg/day. Mean dose: 3.9 mg/day. N=341.</p> <p>5. Ziprasidone: Flexible dose. Allowed dose range: 40-160 mg/day. Mean dose: 112.8 mg/day. N=185.</p> |
| <p><b>Stroup et al. 2006 (59)</b></p> <p>Neutral sponsor</p>    | <p>Allocation: random, 2 steps of randomisation before and after availability of ziprasidone, subjects received other medication than in previous phase 1 treatment. Re-randomised.<br/>Blinding: double, identical capsules.<br/>Duration: 26 weeks.<br/>Design: parallel.<br/>Location: n.i.<br/>Setting: in- and outpatient.</p> | <p>Diagnosis: (DSM-IV) chronic schizophrenia. N=444.<br/>Gender: 308 M, 136 F.<br/>Age: 18-65 years, mean=40.9 years.<br/>History: duration ill n.i., age at onset n.i.</p>                                                      | <p>1. Olanzapine: Flexible dose. Allowed dose range: 7.5-30 mg/day. Mean dose: 20.5 mg/day. N=68.</p> <p>2. Quetiapine: Flexible dose. Allowed dose range: 200-800 mg/day. Mean dose: 565.2 mg/day. N=63.</p> <p>3. Risperidone: Flexible dose. Allowed dose range: 1.5-6.0 mg/day. Mean dose: 4.1 mg/day. N=70.</p> <p>4. Ziprasidone: Flexible dose. Allowed dose range: 40-160 mg/day. Mean dose: 115.9 mg/day. N=137.</p>                                                                                                           |
| <p><b>Svestka et al. 2003 (81)</b></p> <p>Neutral sponsor</p>   | <p>Allocation: random, no further details<br/>Blinding: double<br/>Duration: 6 weeks<br/>Design: parallel<br/>Setting: inpatient</p>                                                                                                                                                                                                | <p>Diagnosis: (ICD-10) first episode, acute schizophrenia, schizoaffective disorder; N=42.<br/>Age, history, duration ill: no further details</p>                                                                                | <p>Olanzapine: no further details<br/>Risperidone: no further details</p>                                                                                                                                                                                                                                                                                                                                                                                                                                                               |
| <p><b>Olanzapine versus Sertindole</b></p>                      |                                                                                                                                                                                                                                                                                                                                     |                                                                                                                                                                                                                                  |                                                                                                                                                                                                                                                                                                                                                                                                                                                                                                                                         |
| <p>No study</p>                                                 |                                                                                                                                                                                                                                                                                                                                     |                                                                                                                                                                                                                                  |                                                                                                                                                                                                                                                                                                                                                                                                                                                                                                                                         |

## Olanzapine versus Ziprasidone

|                                                                 |                                                                                                                                                                                                                                                                                                                                     |                                                                                                                                                                                                                                  |                                                                                                                                                                                                                                                                                                                                                                                                                                                                                                                                         |
|-----------------------------------------------------------------|-------------------------------------------------------------------------------------------------------------------------------------------------------------------------------------------------------------------------------------------------------------------------------------------------------------------------------------|----------------------------------------------------------------------------------------------------------------------------------------------------------------------------------------------------------------------------------|-----------------------------------------------------------------------------------------------------------------------------------------------------------------------------------------------------------------------------------------------------------------------------------------------------------------------------------------------------------------------------------------------------------------------------------------------------------------------------------------------------------------------------------------|
| <p><b>Lieberman et al. 2005 (58)</b></p> <p>Neutral sponsor</p> | <p>Allocation: random, no further details.<br/>Blinding: double, identical capsules.<br/>Duration: 78 weeks.<br/>Design: parallel.<br/>Location: multicentre.<br/>Setting: in- and outpatient.</p>                                                                                                                                  | <p>Diagnosis: (DSM-IV) schizophrenia, previously more than one schizophrenic episode, responder. N=1493.<br/>Gender: 1080 M, 380 F.<br/>Age: 18-65 years, mean=40.6 years.<br/>History: duration ill n.i., age at onset n.i.</p> | <p>1. Olanzapine: Flexible dose. Allowed dose range: 7.5-30 mg/day. Mean dose: 20.1 mg/day. N=336.</p> <p>2. Perphenazine: Flexible dose. Allowed dose range: 8-32 mg/day. Mean dose: 20.8 mg/day. N=261.</p> <p>3. Quetiapine: Flexible dose. Allowed dose range: 200-800 mg/day. Mean dose: 543.4 mg/day. N=337.</p> <p>4. Risperidone: Flexible dose. Allowed dose range: 1.5-6.0 mg/day. Mean dose: 3.9 mg/day. N=341.</p> <p>5. Ziprasidone: Flexible dose. Allowed dose range: 40-160 mg/day. Mean dose: 112.8 mg/day. N=185.</p> |
| <p><b>Stroup et al. 2006 (59)</b></p> <p>Neutral sponsor</p>    | <p>Allocation: random, 2 steps of randomisation before and after availability of ziprasidone, subjects received other medication than in previous phase 1 treatment. Re-randomised.<br/>Blinding: double, identical capsules.<br/>Duration: 26 weeks.<br/>Design: parallel.<br/>Location: n.i.<br/>Setting: in- and outpatient.</p> | <p>Diagnosis: (DSM-IV) chronic schizophrenia. N=444.<br/>Gender: 308 M, 136 F.<br/>Age: 18-65 years, mean=40.9 years.<br/>History: duration ill n.i., age at onset n.i.</p>                                                      | <p>1. Olanzapine: Flexible dose. Allowed dose range: 7.5-30 mg/day. Mean dose: 20.5 mg/day. N=68.</p> <p>2. Quetiapine: Flexible dose. Allowed dose range: 200-800 mg/day. Mean dose: 565.2 mg/day. N=63.</p> <p>3. Risperidone: Flexible dose. Allowed dose range: 1.5-6.0 mg/day. Mean dose: 4.1 mg/day. N=70.</p> <p>4. Ziprasidone: Flexible dose. Allowed dose range: 40-160 mg/day. Mean dose: 115.9 mg/day. N=137.</p>                                                                                                           |
| <p><b>Breier et al. 2005 (82)</b></p> <p>Olanzapine</p>         | <p>Allocation: random, no further details.<br/>Blinding: double, no further details.<br/>Duration: 28 weeks.<br/>Design: parallel.<br/>Location: multicentre.<br/>Setting: in- and outpatient</p>                                                                                                                                   | <p>Diagnosis: (DSM-IV) schizophrenia, BPRS of 42 or more, CGI-S of 4 or more. N=548.<br/>Gender: 352 M, 196 F.<br/>Age: 18-75 years, mean=39.2 years.<br/>History: duration ill n.i., age at onset mean=23.4 years</p>           | <p>1. Olanzapine: Flexible dose. Allowed dose range: 10-20 mg/day. Mean dose: 15.27 mg/day. N=277.</p> <p>2. Ziprasidone: Flexible dose. Allowed dose range: 80-160 mg/day. Mean dose: 115.96 mg/day. N=271.</p>                                                                                                                                                                                                                                                                                                                        |

|                                                    |                                                                                                                                                                                        |                                                                                                                                                                                                                                                                                    |                                                                                                                                                                                                    |
|----------------------------------------------------|----------------------------------------------------------------------------------------------------------------------------------------------------------------------------------------|------------------------------------------------------------------------------------------------------------------------------------------------------------------------------------------------------------------------------------------------------------------------------------|----------------------------------------------------------------------------------------------------------------------------------------------------------------------------------------------------|
| <b>Kinon et al. 2006 (83)</b><br>Olanzapine        | Allocation: random, no further details.<br>Blinding: double, no further details.<br>Duration: 24 weeks.<br>Design: parallel.<br>Location: multicentre.<br>Setting: in- and outpatient. | Diagnosis: (DSM-IV) schizophrenia or schizoaffective disorder, dominant depressive symptoms, MADRS of 16 or more. N=394.<br>Gender: M n.i., F n.i.<br>Age: 18-60 years.<br>History: duration ill n.i., age at onset n.i.                                                           | 1. Olanzapine: Fixed dose: 10, 15 or 20 mg/day. N=202.<br>2. Ziprasidone: Fixed dose: 80, 120 or 160 mg/day. N=192.                                                                                |
| <b>Simpson et al. 2004 (84)</b><br>Ziprasidone     | Allocation: random, no further details.<br>Blinding: double, no further details.<br>Duration: 6 weeks.<br>Design: parallel.<br>Location: multicentre.<br>Setting: inpatient.           | Diagnosis: (DSM-IV) acute schizophrenia (n=170) or schizoaffective disorder (n=99).<br>CGI-S score of 4 or more, CGI-I score of 3 or more. N=269.<br>Gender: 176 M, 93 F.<br>Age: 18-55 years, mean =37.7 years.<br>History: duration ill mean=14.7, age at onset mean=22.9 years. | 1. Olanzapine: Flexible dose. Allowed dose range: 5-15 mg/day. Mean dose: 11.3 mg/day. N=133.<br>2. Ziprasidone: Flexible dose. Allowed dose range: 80-160 mg/day. Mean dose: 129.9 mg/day. N=136. |
| <b>Svestka et al. 2005 (85)</b><br>Neutral sponsor | Allocation: random, no further details<br>Blinding: double<br>Duration: 6 weeks<br>Design: parallel<br>Setting: inpatient                                                              | Diagnosis: (ICD-10) acute schizophrenia, schizoaffective disorder. N=42.<br>Age, history, duration ill: not indicated                                                                                                                                                              | Olanzapine: no further details<br>Ziprasidone: no further details                                                                                                                                  |
| <b>Olanzapine versus Zotepine</b>                  |                                                                                                                                                                                        |                                                                                                                                                                                                                                                                                    |                                                                                                                                                                                                    |
| No study                                           |                                                                                                                                                                                        |                                                                                                                                                                                                                                                                                    |                                                                                                                                                                                                    |

## Quetiapine versus Risperidone

|                                                                 |                                                                                                                                                                                                                                                      |                                                                                                                                                                                                                                                                                                                                                                      |                                                                                                                                                                                                                                                                                                                                                                                                                                                                                                                                         |
|-----------------------------------------------------------------|------------------------------------------------------------------------------------------------------------------------------------------------------------------------------------------------------------------------------------------------------|----------------------------------------------------------------------------------------------------------------------------------------------------------------------------------------------------------------------------------------------------------------------------------------------------------------------------------------------------------------------|-----------------------------------------------------------------------------------------------------------------------------------------------------------------------------------------------------------------------------------------------------------------------------------------------------------------------------------------------------------------------------------------------------------------------------------------------------------------------------------------------------------------------------------------|
| <p><b>Lieberman et al. 2005 (58)</b></p> <p>Neutral sponsor</p> | <p>Allocation: random, no further details.<br/>Blinding: double, identical capsules.<br/>Duration: 78 weeks.<br/>Design: parallel.<br/>Location: multicentre.<br/>Setting: in- and outpatient.</p>                                                   | <p>Diagnosis: (DSM-IV) schizophrenia, previously more than one schizophrenic episode, responder. N=1493.<br/>Gender: 1080 M, 380 F.<br/>Age: 18-65 years, mean=40.6 years.<br/>History: duration ill n.i., age at onset n.i.</p>                                                                                                                                     | <p>1. Olanzapine: Flexible dose. Allowed dose range: 7.5-30 mg/day. Mean dose: 20.1 mg/day. N=336.</p> <p>2. Perphenazine: Flexible dose. Allowed dose range: 8-32 mg/day. Mean dose: 20.8 mg/day. N=261.</p> <p>3. Quetiapine: Flexible dose. Allowed dose range: 200-800 mg/day. Mean dose: 543.4 mg/day. N=337.</p> <p>4. Risperidone: Flexible dose. Allowed dose range: 1.5-6.0 mg/day. Mean dose: 3.9 mg/day. N=341.</p> <p>5. Ziprasidone: Flexible dose. Allowed dose range: 40-160 mg/day. Mean dose: 112.8 mg/day. N=185.</p> |
| <p><b>McEvoy et al. 2006 (65)</b></p> <p>Neutral sponsor</p>    | <p>Allocation: random, no further details.<br/>Blinding: double, identical capsules.<br/>Duration: 52 weeks (26 weeks observed, because of small group sizes .<br/>Design: parallel.<br/>Location: multicentre.<br/>Setting: in- and outpatient.</p> | <p>Diagnosis: (DSM-IV) schizophrenia, inadequate efficacy in previous study, clozapine treatment (n=49) was open-label. N=99.<br/>Gender: 80 M, 19 F.<br/>Age: 18-65 years, mean=39.7 years.<br/>History: duration ill n.i., age at onset n.i.</p>                                                                                                                   | <p>1. Olanzapine: Flexible dose. Allowed dose range: 7.5-30 mg/day. Mean dose: 23.4 mg/day. N=19.</p> <p>2. Quetiapine: Flexible dose. Allowed dose range: 200-800 mg/day. Mean dose: 642.9 mg/day. N=15.</p> <p>3. Risperidone: Flexible dose. Allowed dose range: 1.5-6 mg/day. Mean dose: 4.8 mg/day. N=16</p>                                                                                                                                                                                                                       |
| <p><b>McEvoy et al. 2007 (63)</b></p> <p>Quetiapine</p>         | <p>Allocation: random, no further details.<br/>Blinding: double, no further details.<br/>Duration: 52 weeks.<br/>Design: parallel.<br/>Location: multicentre.<br/>Setting: n.i.</p>                                                                  | <p>Diagnosis: (DSM-IV) schizophrenia (n=231), schizophreniform disorder (n=115) or schizoaffective disorder (n=54), first episode, psychotic symptoms for 1 month to 5 years, PANSS psychosis and CGI-S score of 4 or more. N=400.<br/>Gender: 292 M, 108 F.<br/>Age: 16-40 years, mean=24.5 years.<br/>History: duration ill mean=1.08 years, age at onset n.i.</p> | <p>1. Olanzapine: Flexible dose. Allowed dose range: 7.5-30 mg/day. Mean dose: 23.4 mg/day. N=19.</p> <p>2. Quetiapine: Flexible dose. Allowed dose range: 200-800 mg/day. Mean dose: 642.9 mg/day. N=15.</p> <p>3. Risperidone: Flexible dose. Allowed dose range: 1.5-6 mg/day. Mean dose: 4.8 mg/day. N=16.</p>                                                                                                                                                                                                                      |

|                                                              |                                                                                                                                                                                                                                                                                                                                     |                                                                                                                                                                                                                                            |                                                                                                                                                                                                                                                                                                                                                                                                                  |
|--------------------------------------------------------------|-------------------------------------------------------------------------------------------------------------------------------------------------------------------------------------------------------------------------------------------------------------------------------------------------------------------------------------|--------------------------------------------------------------------------------------------------------------------------------------------------------------------------------------------------------------------------------------------|------------------------------------------------------------------------------------------------------------------------------------------------------------------------------------------------------------------------------------------------------------------------------------------------------------------------------------------------------------------------------------------------------------------|
| <p><b>Stroup et al. 2006 (59)</b></p> <p>Neutral sponsor</p> | <p>Allocation: random, 2 steps of randomisation before and after availability of ziprasidone, subjects received other medication than in previous phase 1 treatment. Re-randomised.<br/>Blinding: double, identical capsules.<br/>Duration: 26 weeks.<br/>Design: parallel.<br/>Location: n.i.<br/>Setting: in- and outpatient.</p> | <p>Diagnosis: (DSM-IV) chronic schizophrenia. N=444.<br/>Gender: 308 M, 136 F.<br/>Age: 18-65 years, mean=40.9 years.<br/>History: duration ill n.i., age at onset n.i.</p>                                                                | <p>1.Olanzapine: Flexible dose. Allowed dose range: 7.5-30 mg/day. Mean dose: 20.5 mg/day. N=68.<br/>2.Quetiapine: Flexible dose. Allowed dose range: 200-800 mg/day. Mean dose: 565.2 mg/day. N=63.<br/>3.Risperidone: Flexible dose. Allowed dose range: 1.5-6.0 mg/day. Mean dose: 4.1 mg/day. N=70.<br/>4.Ziprasidone: Flexible dose. Allowed dose range: 40-160 mg/day. Mean dose: 115.9 mg/day. N=137.</p> |
| <p><b>Mori et al. 2004 (64)</b></p> <p>Unclear</p>           | <p>Allocation: random, no further details.<br/>Blinding: single (rater-blinded).<br/>Duration: 16 weeks (8 weeks observed).<br/>Design: parallel.<br/>Location: multicentre.<br/>Setting: inpatient.</p>                                                                                                                            | <p>Diagnosis: (DSM-IV) schizophrenia disorganised (n=23), paranoid (n=10), undifferentiated (n=34). N=77.<br/>Gender: 39 M, 38 F.<br/>Age: 28-84 years, mean=59.9 years.<br/>History: duration ill mean=34.51 years, age at onset n.i.</p> | <p>1. Olanzapine: Flexible dose. Allowed dose range: 2.5-20 mg/day. Mean dose: 16.5 mg/day. N=20.<br/>2. Perospirone: Flexible dose. Allowed dose range: 4-48 mg/day. Mean dose: 37.3 mg/day. N=18.<br/>3. Quetiapine: Flexible dose. Allowed dose range: 50-750 mg/day. Mean dose: 432.5 mg/day. N=20.<br/>4. Risperidone: Flexible dose. Allowed dose range: 1-12 mg/day. Mean dose: 7.37 mg/day. N=19</p>     |
| <p><b>Sachetti et al. 2004 (67)</b></p> <p>Quetiapine</p>    | <p>Allocation: random, no further details.<br/>Blinding: single (rater-blinded).<br/>Duration: 16 weeks (8 weeks observed).<br/>Design: parallel.<br/>Location: multicentre.<br/>Setting: inpatient.</p>                                                                                                                            | <p>Diagnosis: (DSM-IV) schizophrenia, PANSS total score of 70 or more, PANSS positive subscore of 4 or more on at least 2 items N=75<br/>Age: 18-65 years<br/>History: duration ill n.i., age at onset n.i.</p>                            | <p>1. Olanzapine: Flexible dose. Allowed dose range: 10-20 mg/day. Mean dose: 14.6 mg/day. N=25.<br/>2. Quetiapine: Flexible dose. Allowed dose range: 400-800 mg/day. Mean dose: 602.4 mg/day N=25.<br/>3.Risperidone: Flexible dose. Allowed dose range: 4-8 mg/day. Mean dose: 4.3 mg/day. N=25</p>                                                                                                           |

|                                                              |                                                                                                                                                                                                             |                                                                                                                                                                                                                                                                                             |                                                                                                                                                                                                                                                                                                                                                                         |
|--------------------------------------------------------------|-------------------------------------------------------------------------------------------------------------------------------------------------------------------------------------------------------------|---------------------------------------------------------------------------------------------------------------------------------------------------------------------------------------------------------------------------------------------------------------------------------------------|-------------------------------------------------------------------------------------------------------------------------------------------------------------------------------------------------------------------------------------------------------------------------------------------------------------------------------------------------------------------------|
| <p><b>Conley et al. 2005 (86)</b></p> <p>Neutral sponsor</p> | <p>Allocation: random, no further details.<br/>Blinding: double, no further details.<br/>Duration: 12 weeks.<br/>Design: parallel.<br/>Location: n.i.<br/>Setting: n.i.</p>                                 | <p>Diagnosis: (DSM-IV) schizophrenia, persistent positive psychotic symptoms, treatment resistance. N=38 (N=27 observed).<br/>Gender: n.i.<br/>Age: 18-65 years, mean=45.1 years.<br/>History: duration ill n.i., age at onset n.i.</p>                                                     | <p>1. Fluphenazine: Fixed dose: 12.5 mg/day. N=9 (of observed cases).<br/>2. Quetiapine: Fixed dose: 400 mg/day. N=6 (of observed cases)<br/>3. Risperidone: Fixed dose: 4 mg/day. N=12 (of observed cases).</p>                                                                                                                                                        |
| <p><b>Potkin et al. 2006 (87)</b></p> <p>Risperidone</p>     | <p>Allocation: random, no further details.<br/>Blinding: double, identical capsules.<br/>Duration: 6 weeks (2 weeks observed).<br/>Design: parallel.<br/>Location: multicentre.<br/>Setting: inpatient.</p> | <p>Diagnosis: (DSM-IV) schizophrenia (n=341) disorganised, paranoid or undifferentiated or schizoaffective disorder, CGI-S of 5 or more, recent exacerbation. N=382.<br/>Gender: 251 M, 131 F.<br/>Age: 18-65 years, mean=34.8 years.<br/>History: duration ill n.i., age at onset n.i.</p> | <p>1. Quetiapine Flexible dose. Allowed dose range: 50-800 mg/day. Mean dose: 523.8 mg/day (after 2 weeks). (579.5 mg/day, after 6 weeks). N=156.<br/>2. Risperidone: Flexible dose. Allowed dose range: 1-6 mg/day. Mean dose: 4.32 mg/day (after 2 weeks). (4.7 mg/day, after 6 weeks). N=153.</p>                                                                    |
| <p><b>Riedel et al. 2005 (88)</b></p> <p>Quetiapine</p>      | <p>Allocation: random, no further details.<br/>Blinding: double, identical capsules.<br/>Duration: 12 weeks.<br/>Design: parallel.<br/>Location: n.i.<br/>Setting: partially in- and outpatient</p>         | <p>Diagnosis: (DSM-IV or ICD-10) schizophrenia, predominant negative symptoms, CGI of 4 or more, PANSS negative subscore of 21 or more. N=44.<br/>Gender: 27 M, 17 F.<br/>Age: mean=35 years,<br/>History: duration ill mean 4 years, age at onset: mean=31.1 years.</p>                    | <p>1. Quetiapine: Flexible dose. Allowed dose range: 50-800 mg/day. Mean dose: 589.7 mg/day. N=22.<br/>2. Risperidone: Flexible dose. Allowed dose range: 2-8 mg/day. Mean dose: 4.9 mg/day. N=22.</p>                                                                                                                                                                  |
| <p><b>Atmaca et al. 2003 (37)</b></p> <p>Neutral sponsor</p> | <p>Allocation: random, no further details.<br/>Blinding: single, rater-blinded.<br/>Duration: 6 weeks.<br/>Design: parallel.<br/>Location: singlecentre.<br/>Setting: inpatient</p>                         | <p>Diagnosis: (DSM-IV) schizophrenia. N=56.<br/>Gender: 24 M, 29 F.<br/>Age: 19-46 years, mean=30.8 years.<br/>History: duration ill mean 6.1 years, age at onset n.i.</p>                                                                                                                  | <p>1. Clozapine: Flexible dose. Allowed dose range: n.i. Mean dose: 207.1 mg/day. N=14.<br/>2. Olanzapine: Flexible dose. Allowed dose range: n.i. Mean dose: 15.7 mg/day. N=14.<br/>3. Quetiapine: Flexible dose. Allowed dose range: n.i. Mean dose: 535.7 mg/day. N=14.<br/>4. Risperidone: Flexible dose. Allowed dose range: n.i. Mean dose: 6.7 mg/day. N=14.</p> |

|                                                                 |                                                                                                                                                                                                                        |                                                                                                                                                                                                                                  |                                                                                                                                                                                                                                                                                                                                                                                                                                                                                                                             |
|-----------------------------------------------------------------|------------------------------------------------------------------------------------------------------------------------------------------------------------------------------------------------------------------------|----------------------------------------------------------------------------------------------------------------------------------------------------------------------------------------------------------------------------------|-----------------------------------------------------------------------------------------------------------------------------------------------------------------------------------------------------------------------------------------------------------------------------------------------------------------------------------------------------------------------------------------------------------------------------------------------------------------------------------------------------------------------------|
| <p><b>Zhong et al. 2006 (89)</b></p> <p>Quetiapine</p>          | <p>Allocation: random, no further details.<br/>Blinding: double, no further details.<br/>Duration: 8 weeks.<br/>Design: parallel.<br/>Location: multicentre.<br/>Setting: in- and outpatient, initially inpatient.</p> | <p>Diagnosis: (DSM-IV) schizophrenia, PANSS of 60 or more. N=673.<br/>Gender: 510 M, 163 F.<br/>Age: 18-65 years, mean=39.9 years.<br/>History: duration ill n.i., age at onset n.i.</p>                                         | <p>1. Quetiapine: Flexible dose. Allowed dose range: 200-800 mg/day. Mean dose: 525 mg/day. N=338.<br/>2. Risperidone: Flexible dose. Allowed dose range: 2-8 mg/day. Mean dose: 5.2 mg/day. N=335.</p>                                                                                                                                                                                                                                                                                                                     |
| <p><b>Quetiapine versus Sertindole</b></p>                      |                                                                                                                                                                                                                        |                                                                                                                                                                                                                                  |                                                                                                                                                                                                                                                                                                                                                                                                                                                                                                                             |
| <p>No Study</p>                                                 |                                                                                                                                                                                                                        |                                                                                                                                                                                                                                  |                                                                                                                                                                                                                                                                                                                                                                                                                                                                                                                             |
| <p><b>Quetiapine versus Ziprasidone</b></p>                     |                                                                                                                                                                                                                        |                                                                                                                                                                                                                                  |                                                                                                                                                                                                                                                                                                                                                                                                                                                                                                                             |
| <p><b>Lieberman et al. 2005 (58)</b></p> <p>Neutral sponsor</p> | <p>Allocation: random, no further details.<br/>Blinding: double, identical capsules.<br/>Duration: 78 weeks.<br/>Design: parallel.<br/>Location: multicentre.<br/>Setting: in- and outpatient.</p>                     | <p>Diagnosis: (DSM-IV) schizophrenia, previously more than one schizophrenic episode, responder. N=1493.<br/>Gender: 1080 M, 380 F.<br/>Age: 18-65 years, mean=40.6 years.<br/>History: duration ill n.i., age at onset n.i.</p> | <p>1. Olanzapine: Flexible dose. Allowed dose range: 7.5-30 mg/day. Mean dose: 20.1 mg/day. N=336.<br/>2. Perphenazine: Flexible dose. Allowed dose range: 8-32 mg/day. Mean dose: 20.8 mg/day. N=261.<br/>3. Quetiapine: Flexible dose. Allowed dose range: 200-800 mg/day. Mean dose: 543.4 mg/day. N=337.<br/>4. Risperidone: Flexible dose. Allowed dose range: 1.5-6.0 mg/day. Mean dose: 3.9 mg/day. N=341.<br/>5. Ziprasidone: Flexible dose. Allowed dose range: 40-160 mg/day. Mean dose: 112.8 mg/day. N=185.</p> |



|                                                              |                                                                                                                                                                                                                                                                                                                                     |                                                                                                                                                                                                                                                                        |                                                                                                                                                                                                                                                                                                                                                                                                                               |
|--------------------------------------------------------------|-------------------------------------------------------------------------------------------------------------------------------------------------------------------------------------------------------------------------------------------------------------------------------------------------------------------------------------|------------------------------------------------------------------------------------------------------------------------------------------------------------------------------------------------------------------------------------------------------------------------|-------------------------------------------------------------------------------------------------------------------------------------------------------------------------------------------------------------------------------------------------------------------------------------------------------------------------------------------------------------------------------------------------------------------------------|
| <p><b>Stroup et al. 2006 (59)</b></p> <p>Neutral sponsor</p> | <p>Allocation: random, 2 steps of randomisation before and after availability of ziprasidone, subjects received other medication than in previous phase 1 treatment. Re-randomised.<br/>Blinding: double, identical capsules.<br/>Duration: 26 weeks.<br/>Design: parallel.<br/>Location: n.i.<br/>Setting: in- and outpatient.</p> | <p>Diagnosis: (DSM-IV) chronic schizophrenia. N=444.<br/>Gender: 308 M, 136 F.<br/>Age: 18-65 years, mean=40.9 years.<br/>History: duration ill n.i., age at onset n.i.</p>                                                                                            | <p>1. Olanzapine: Flexible dose. Allowed dose range: 7.5-30 mg/day. Mean dose: 20.5 mg/day. N=68.</p> <p>2. Quetiapine: Flexible dose. Allowed dose range: 200-800 mg/day. Mean dose: 565.2 mg/day. N=63.</p> <p>3. Risperidone: Flexible dose. Allowed dose range: 1.5-6.0 mg/day. Mean dose: 4.1 mg/day. N=70.</p> <p>4. Ziprasidone: Flexible dose. Allowed dose range: 40-160 mg/day. Mean dose: 115.9 mg/day. N=137.</p> |
| <p><b>Quetiapine versus Zotepine</b></p>                     |                                                                                                                                                                                                                                                                                                                                     |                                                                                                                                                                                                                                                                        |                                                                                                                                                                                                                                                                                                                                                                                                                               |
| <p>No study</p>                                              |                                                                                                                                                                                                                                                                                                                                     |                                                                                                                                                                                                                                                                        |                                                                                                                                                                                                                                                                                                                                                                                                                               |
| <p><b>Risperidone versus Sertindole</b></p>                  |                                                                                                                                                                                                                                                                                                                                     |                                                                                                                                                                                                                                                                        |                                                                                                                                                                                                                                                                                                                                                                                                                               |
| <p><b>Azorin et al. 2006 (90)</b></p> <p>Sertindole</p>      | <p>Allocation: random, no further details.<br/>Blinding: double, identical capsules.<br/>Duration: 12 weeks.<br/>Design: parallel.<br/>Location: multicentre.<br/>Setting: in- and outpatient.</p>                                                                                                                                  | <p>Diagnosis: (DSM-IV) schizophrenia, catatonic (n=6), disorganised (n=48), paranoid (n=100) or undifferentiated (n=32), at least moderately ill on CGI-S. N=187.<br/>Gender: 113 M, 73 F.<br/>Age: 18-65 years.<br/>History: duration ill n.i., age at onset n.i.</p> | <p>1. Risperidone: Flexible dose. Allowed dose range: 4-10 mg/day. Mean dose: 6.6 mg/day. N=89.</p> <p>2. Sertindole: Flexible dose. Allowed dose range: 12-24 mg/day. Mean dose: 16.2 mg/day. N=98.</p>                                                                                                                                                                                                                      |
| <p><b>Kane et al. 2005 (12)</b></p> <p>Sertindole</p>        | <p>Allocation: random, no further details.<br/>Blinding: double, no further details.<br/>Duration: 12 weeks.<br/>Design: parallel.<br/>Location: multicentre.<br/>Setting: n.i.</p>                                                                                                                                                 | <p>Diagnosis: (DSM-IV) schizophrenia, treatment resistance, PANSS total score of 60 or more. N=321.<br/>Gender: 250 M, 71 F.<br/>Age: 18-55 years, mean=38.8 years.<br/>History: duration ill n.i., age at onset mean=22.1 years.</p>                                  | <p>1. Risperidone: Flexible dose. Allowed dose range: 6-12 mg/day. Mean dose: 9.0 mg/day. N=105.</p> <p>2. Sertindole: Flexible dose. Allowed dose range: 12-24 mg/day. Mean dose: 18.1 mg/day. N=216.</p>                                                                                                                                                                                                                    |

## Risperidone versus Ziprasidone

|                                                                 |                                                                                                                                                                                                                                                                                                                                     |                                                                                                                                                                                                                                                                  |                                                                                                                                                                                                                                                                                                                                                                                                                                                                                                                                         |
|-----------------------------------------------------------------|-------------------------------------------------------------------------------------------------------------------------------------------------------------------------------------------------------------------------------------------------------------------------------------------------------------------------------------|------------------------------------------------------------------------------------------------------------------------------------------------------------------------------------------------------------------------------------------------------------------|-----------------------------------------------------------------------------------------------------------------------------------------------------------------------------------------------------------------------------------------------------------------------------------------------------------------------------------------------------------------------------------------------------------------------------------------------------------------------------------------------------------------------------------------|
| <p><b>Lieberman et al. 2005 (58)</b></p> <p>Neutral sponsor</p> | <p>Allocation: random, no further details.<br/>Blinding: double, identical capsules.<br/>Duration: 78 weeks.<br/>Design: parallel.<br/>Location: multicentre.<br/>Setting: in- and outpatient.</p>                                                                                                                                  | <p>Diagnosis: (DSM-IV) schizophrenia, previously more than one schizophrenic episode, responder. N=1493.<br/>Gender: 1080 M, 380 F.<br/>Age: 18-65 years, mean=40.6 years.<br/>History: duration ill n.i., age at onset n.i.</p>                                 | <p>1. Olanzapine: Flexible dose. Allowed dose range: 7.5-30 mg/day. Mean dose: 20.1 mg/day. N=336.</p> <p>2. Perphenazine: Flexible dose. Allowed dose range: 8-32 mg/day. Mean dose: 20.8 mg/day. N=261.</p> <p>3. Quetiapine: Flexible dose. Allowed dose range: 200-800 mg/day. Mean dose: 543.4 mg/day. N=337.</p> <p>4. Risperidone: Flexible dose. Allowed dose range: 1.5-6.0 mg/day. Mean dose: 3.9 mg/day. N=341.</p> <p>5. Ziprasidone: Flexible dose. Allowed dose range: 40-160 mg/day. Mean dose: 112.8 mg/day. N=185.</p> |
| <p><b>Stroup et al. 2006 (59)</b></p> <p>Neutral sponsor</p>    | <p>Allocation: random, 2 steps of randomisation before and after availability of ziprasidone, subjects received other medication than in previous phase 1 treatment. Re-randomised.<br/>Blinding: double, identical capsules.<br/>Duration: 26 weeks.<br/>Design: parallel.<br/>Location: n.i.<br/>Setting: in- and outpatient.</p> | <p>Diagnosis: (DSM-IV) chronic schizophrenia. N=444.<br/>Gender: 308 M, 136 F.<br/>Age: 18-65 years, mean olanzapine=40.9 years.<br/>History: duration ill n.i., age at onset n.i.</p>                                                                           | <p>1. Olanzapine: Flexible dose. Allowed dose range: 7.5-30 mg/day. Mean dose: 20.5 mg/day. N=68.</p> <p>2. Quetiapine: Flexible dose. Allowed dose range: 200-800 mg/day. Mean dose: 565.2 mg/day. N=63.</p> <p>3. Risperidone: Flexible dose. Allowed dose range: 1.5-6.0 mg/day. Mean dose: 4.1 mg/day. N=70.</p> <p>4. Ziprasidone: Flexible dose. Allowed dose range: 40-160 mg/day. Mean dose: 115.9 mg/day. N=137.</p>                                                                                                           |
| <p><b>Addington et al. 2004 (91)</b></p> <p>Ziprasidone</p>     | <p>Allocation: random, no further details.<br/>Blinding: double, no further details.<br/>Duration: 8 weeks.<br/>Design: parallel.<br/>Location: multicentre.<br/>Setting: n.i.</p>                                                                                                                                                  | <p>Diagnosis: (DSM-III-R) schizophrenia (n=260) or schizoaffective disorder (n=36), acute exacerbation, PANSS total score of 60 or more. N=296.<br/>Gender: 215 M, 81 F.<br/>Age: 18-64 years.<br/>History: duration ill n.i., age at onset mean=24.9 years.</p> | <p>1. Risperidone: Flexible dose. Allowed dose range: 6-10 mg/day. Mean dose: 7.4 mg/day. N=147.</p> <p>2. Ziprasidone: Flexible dose. Allowed dose range: 80-160 mg/day. Mean dose: 114.2 mg/day. N=149.</p>                                                                                                                                                                                                                                                                                                                           |

|                                      |
|--------------------------------------|
| <b>Risperidone versus Zotepine</b>   |
| No study                             |
| <b>Sertindole versus Ziprasidone</b> |
| No Study                             |
| <b>Sertindole versus Zotepine</b>    |
| No study                             |
| <b>Ziprasidone versus Zotepine</b>   |
| No study                             |

N= number of patients, M = male, F = female, PANSS = Positive and Negative Syndrome Scale, BPRS = Brief Psychiatric Rating Scale, MADRS = Montgomery Asberg Depression Rating Scale, SANS = Scale for the Assessment of Negative Symptoms, CGI = Clinical Global Impression, EPS = extrapyramidal symptoms, ICD 9/10 = International Classification of Diseases, 9th/10th Revision, DSM-III-R, -IV = different versions of the Diagnostic and Statistical Manual of Mental Disorders, CCMD-2, -3 = Chinese Classification of Mental Disorders 2<sup>nd</sup>/3<sup>rd</sup> Revision, n.i. = not indicated

**Figures I. 1. a – I. 8. e : PANSS total score (weighted mean difference, WMD)**

**Figure I. 1. a: PANSS total score - Amisulpride versus Olanzapine**

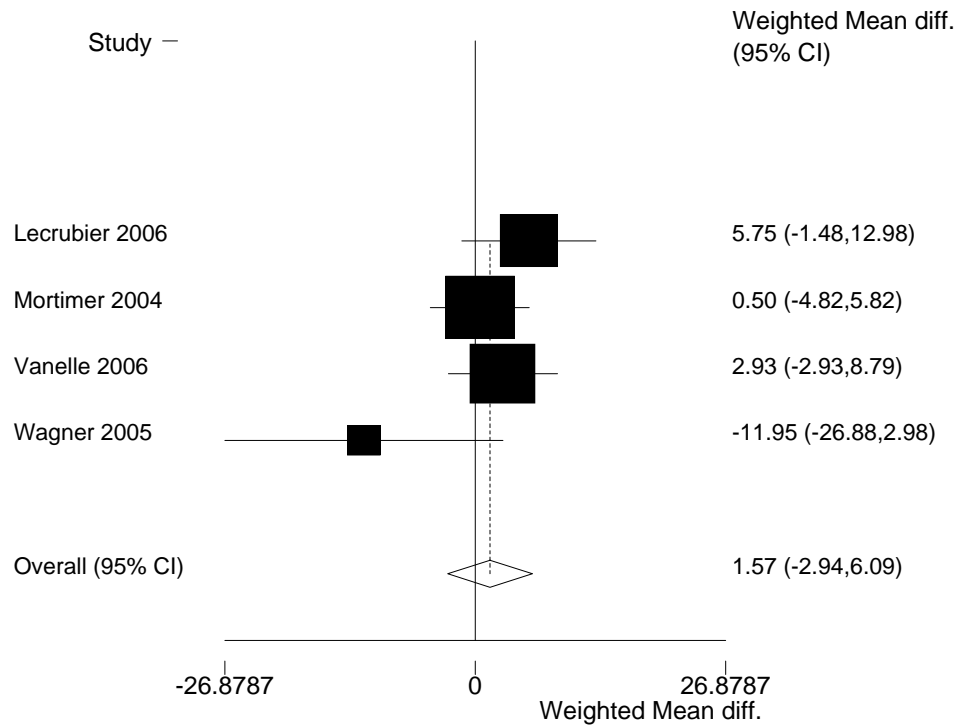

N=701

Heterogeneity chi-squared = 4.78 (d.f. = 3) p = 0.189

Estimate of between-study variance Tau-squared = 7.7295

Test of WMD=0 : z= 0.68 p = 0.494

**Figure I. 1. b: PANSS total score - Amisulpride versus Risperidone**

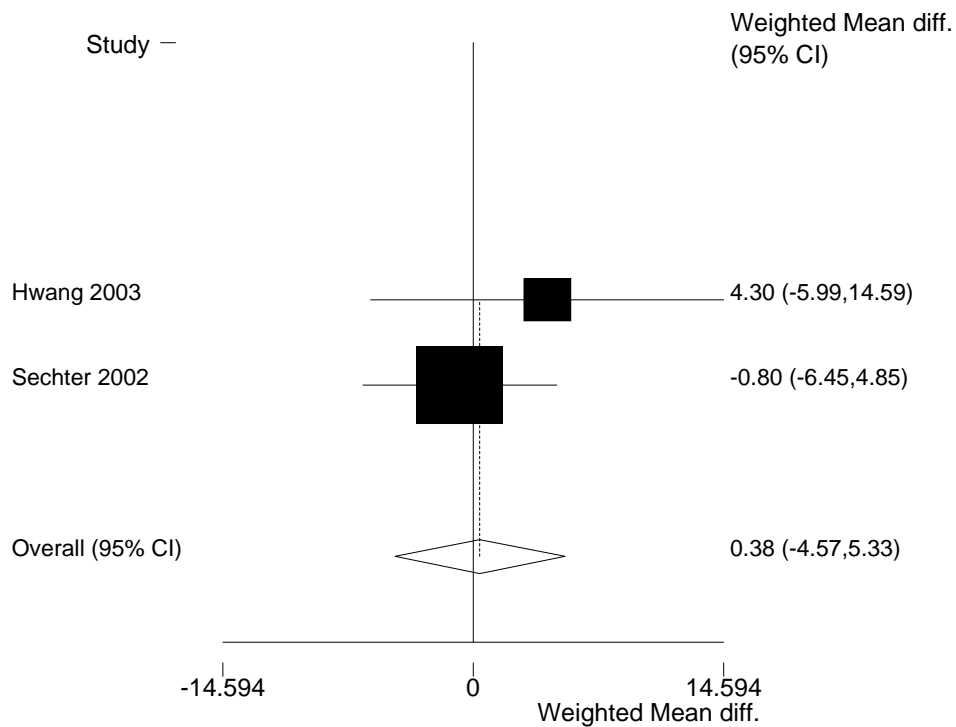

N=291

Heterogeneity chi-squared = 0.72 (d.f. = 1) p = 0.395

Estimate of between-study variance Tau-squared = 0.0000

Test of WMD=0 : z= 0.15 p = 0.880

**Figure I. 1. c: PANSS total score - Amisulpride versus Ziprasidone**

| Study          | WMD  | [95% Conf. Interval] |
|----------------|------|----------------------|
| Olje 2006      | -2.7 | -8.94949 3.54949     |
| I-V pooled WMD | -2.7 | -8.94949 3.54949     |

N=122

Test of WMD=0 : z= 0.85 p = 0.397

**Figure I. 2. a: PANSS total score - Aripiprazole versus Olanzapine**

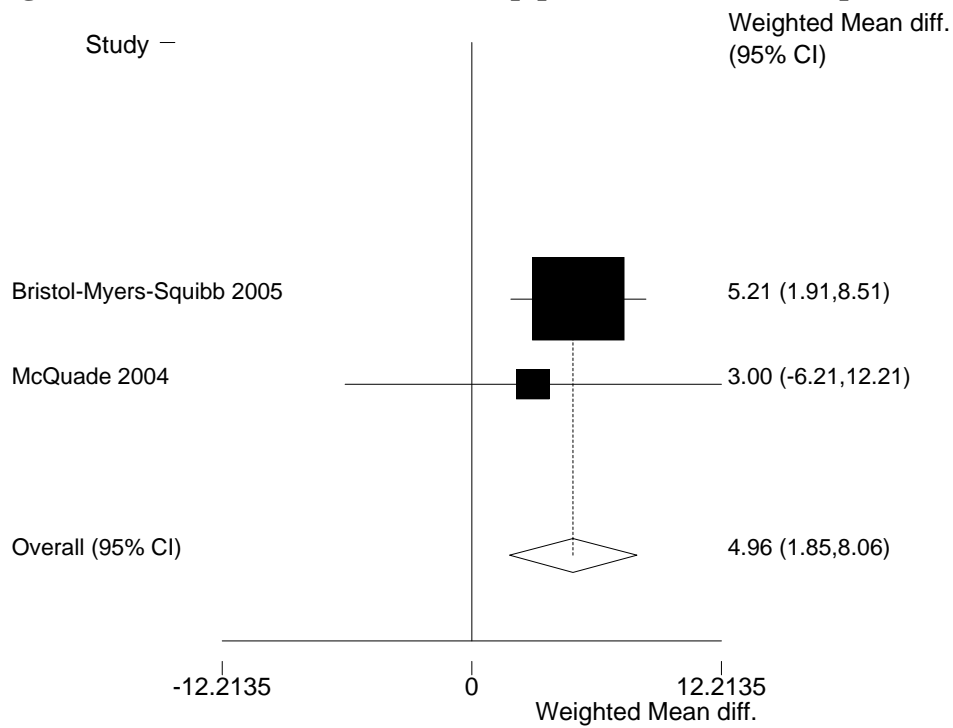

N=794

Heterogeneity chi-squared = 0.20 (d.f. = 1) p = 0.658

Estimate of between-study variance Tau-squared = 0.0000

Test of WMD=0 : z= 3.13 p = 0.002

**Figure I. 2. b: PANSS total score - Aripiprazole versus Risperidone**

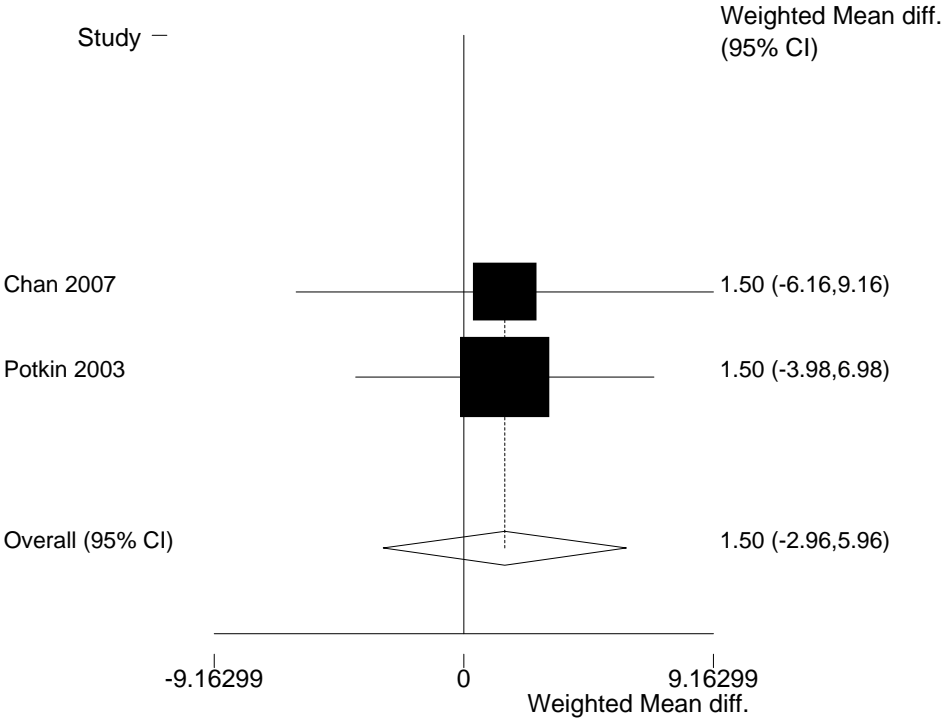

N=372  
 Heterogeneity chi-squared = 0.00 (d.f. = 1) p = 1.000  
 Estimate of between-study variance Tau-squared = 0.0000  
 Test of WMD=0 : z= 0.66 p = 0.509

**Figure I. 3. a: PANSS total score - Clozapine versus Olanzapine**

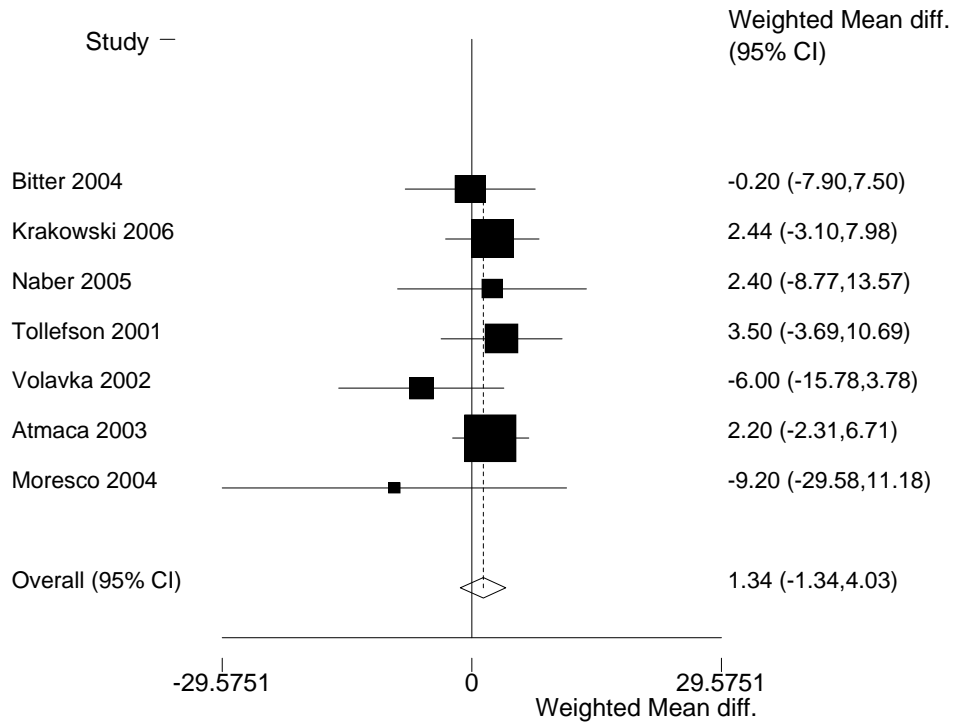

N=619

Heterogeneity chi-squared = 4.02 (d.f. = 6) p = 0.674

Estimate of between-study variance Tau-squared = 0.0000

Test of WMD=0 : z= 0.98 p = 0.327



**Figure I. 3. b: PANSS total score - Clozapine versus Quetiapine**

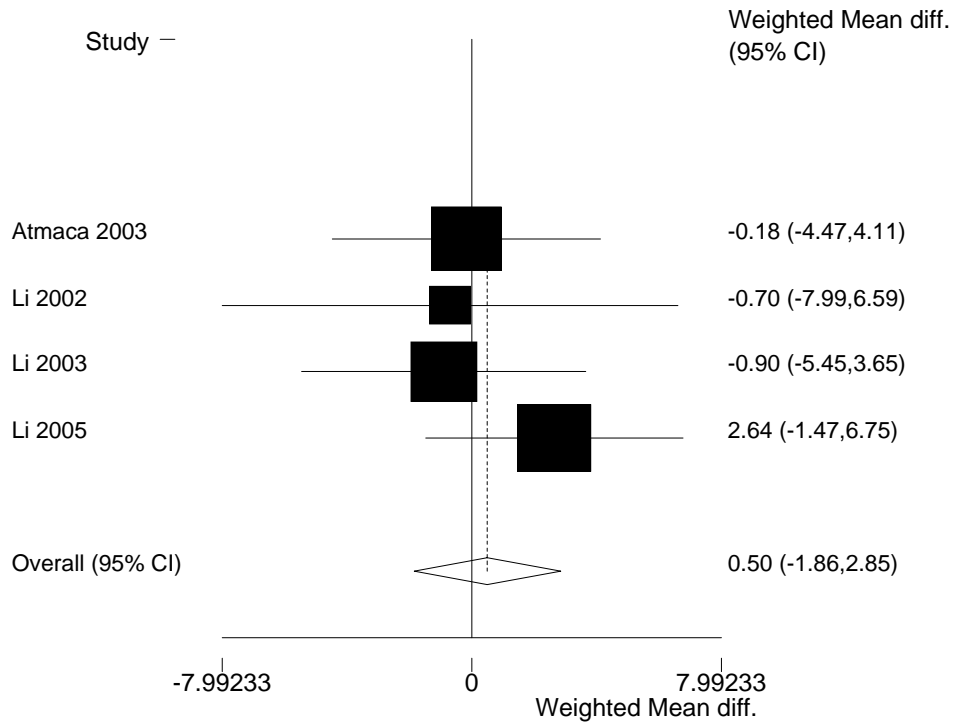

N=232

Heterogeneity chi-squared = 1.61 (d.f. = 3) p = 0.658

Estimate of between-study variance Tau-squared = 0.0000

Test of WMD=0 : z = 0.41 p = 0.679

**Figure I. 3. c: PANSS total score - Clozapine versus Risperidone**

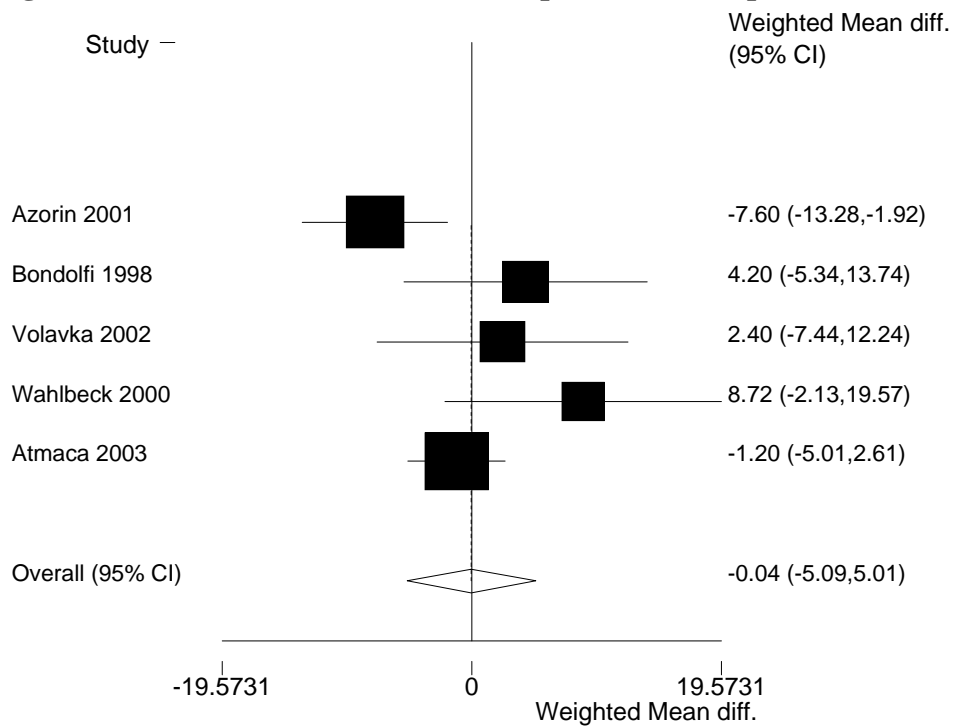

N=466

Heterogeneity chi-squared = 9.81 (d.f. = 4) p = 0.044

Estimate of between-study variance Tau-squared = 18.1717

Test of WMD=0 : z= 0.02 p = 0.987

**Figure I. 3. d: PANSS total score - Clozapine versus Ziprasidone**

| Study          | WMD | [95% Conf. Interval] |
|----------------|-----|----------------------|
| Sacchetti 2006 | .5  | -6.7187 7.7187       |
| I-V pooled WMD | .5  | -6.7187 7.7187       |

N=146

Test of WMD=0 : z= 0.14 p = 0.892

**Figure I. 4. a: PANSS total score - Olanzapine versus Amisulpride**

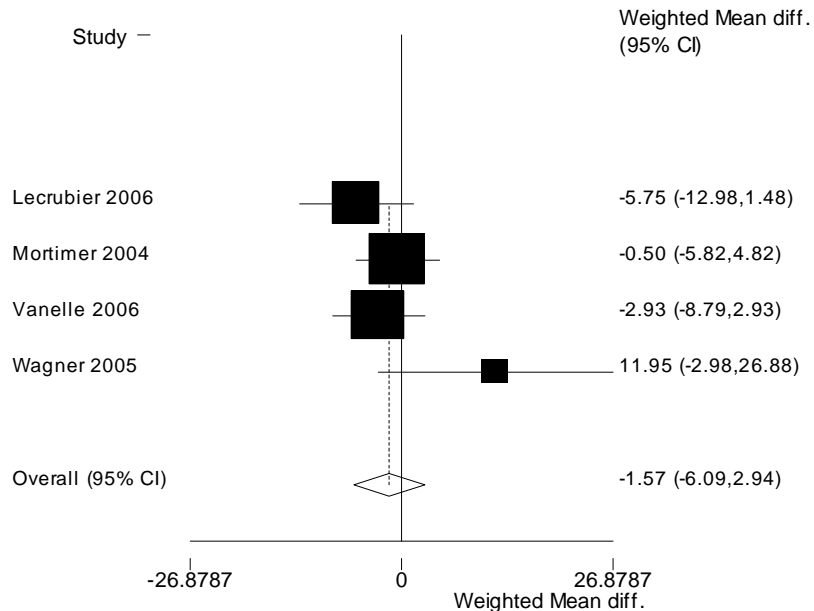

N=701

Heterogeneity chi-squared = 4.78 (d.f. = 3) p = 0.189

Estimate of between-study variance Tau-squared = 7.7295

Test of WMD=0 : z= 0.68 p = 0.494

**Figure I. 4. b: PANSS total score - Olanzapine versus Aripiprazole**

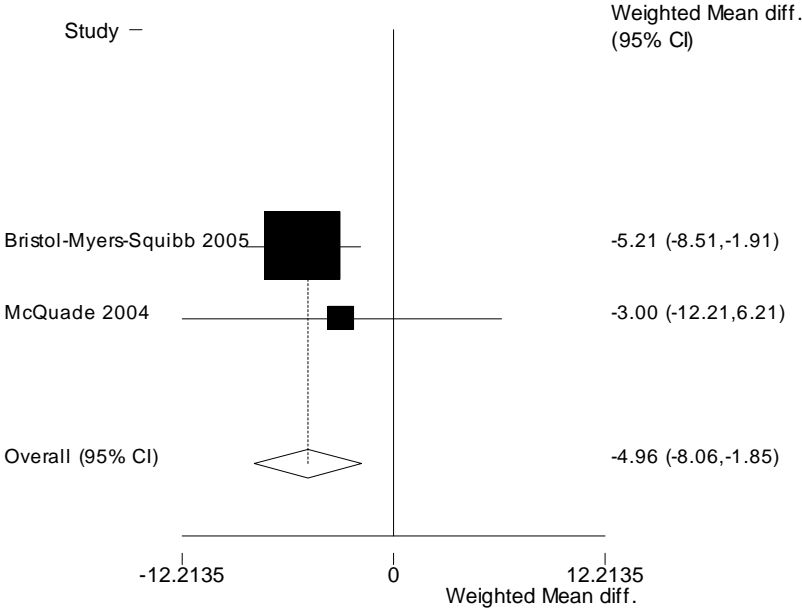

N=794  
 Heterogeneity chi-squared = 0.20 (d.f. = 1) p = 0.658  
 Estimate of between-study variance Tau-squared = 0.0000  
 Test of WMD=0 : z= 3.13 p = 0.002

**Figure I. 4. c: PANSS total score - Olanzapine versus Clozapine**

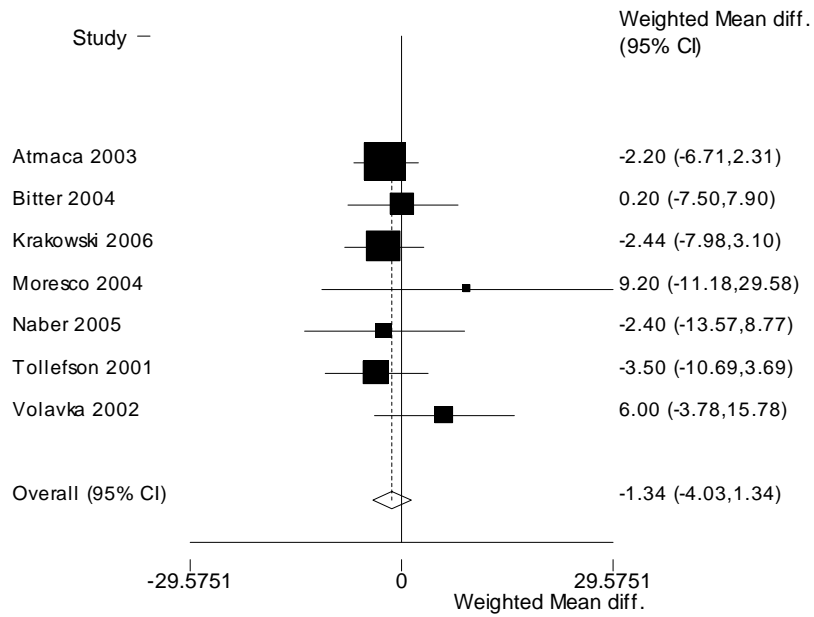

N=619

Heterogeneity chi-squared = 4.02 (d.f. = 6) p = 0.674

Estimate of between-study variance Tau-squared = 0.0000

Test of WMD=0 : z = 0.98 p = 0.327

**Figure I. 4. d: PANSS total score - Olanzapine versus Quetiapine**

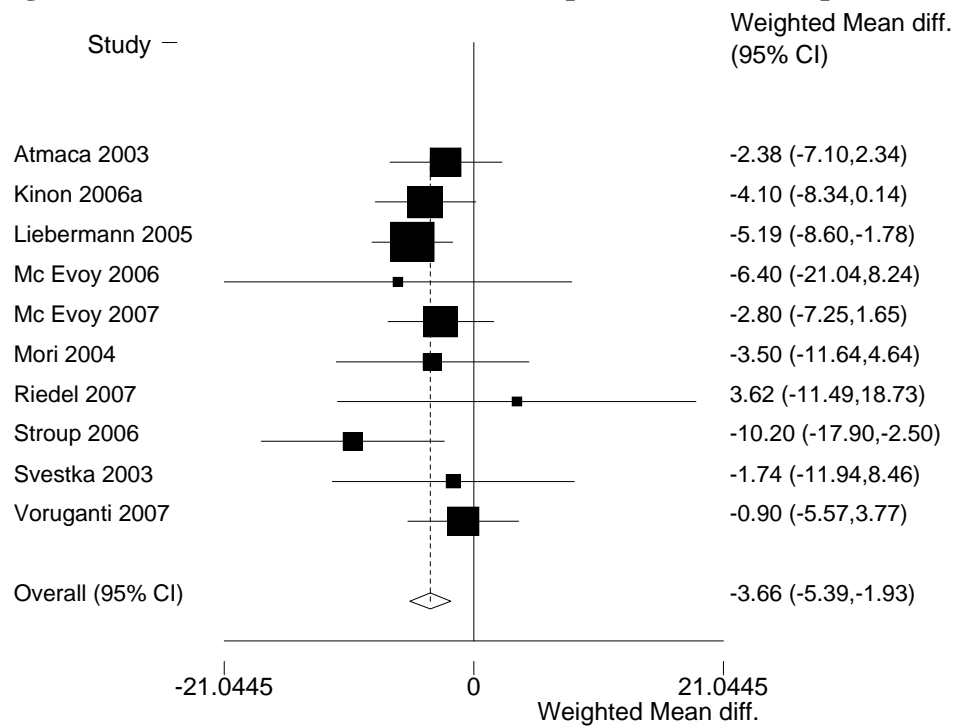

N=1449

Heterogeneity chi-squared = 6.52 (d.f. = 9) p = 0.687

Estimate of between-study variance Tau-squared = 0.0000

Test of WMD=0 : z= 4.14 p = 0.000

**Figure I. 4. e: PANSS total score - Olanzapine versus Risperidone**

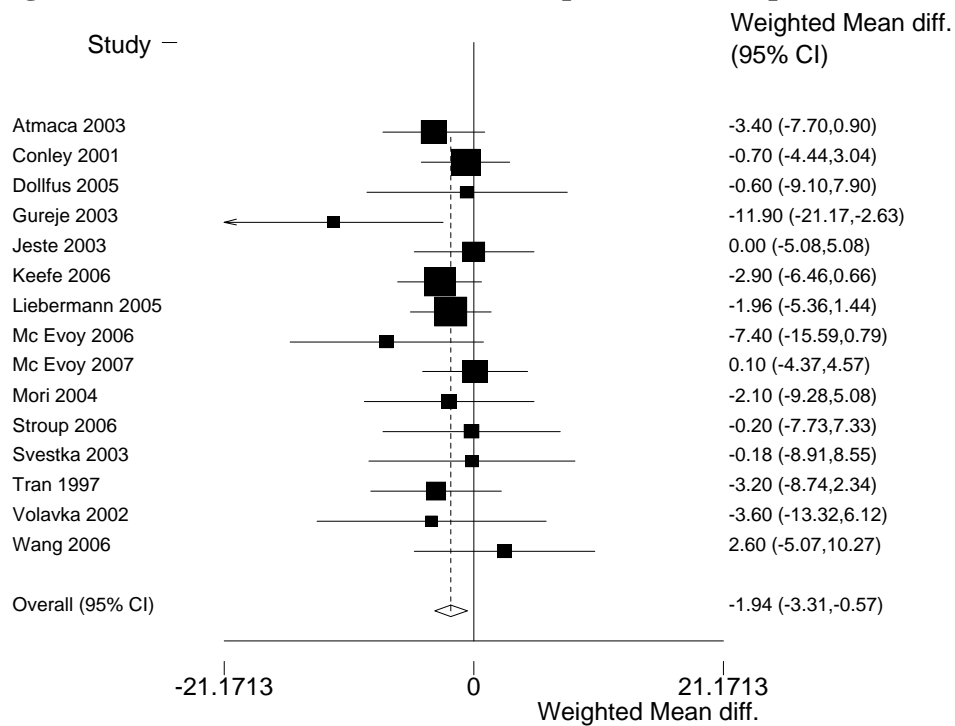

N=2404

Heterogeneity chi-squared = 10.76 (d.f. = 14) p = 0.704

Estimate of between-study variance Tau-squared = 0.0000

Test of WMD=0 : z = 2.77 p = 0.006

**Figure I. 4. f: PANSS total score - Olanzapine versus Ziprasidone**

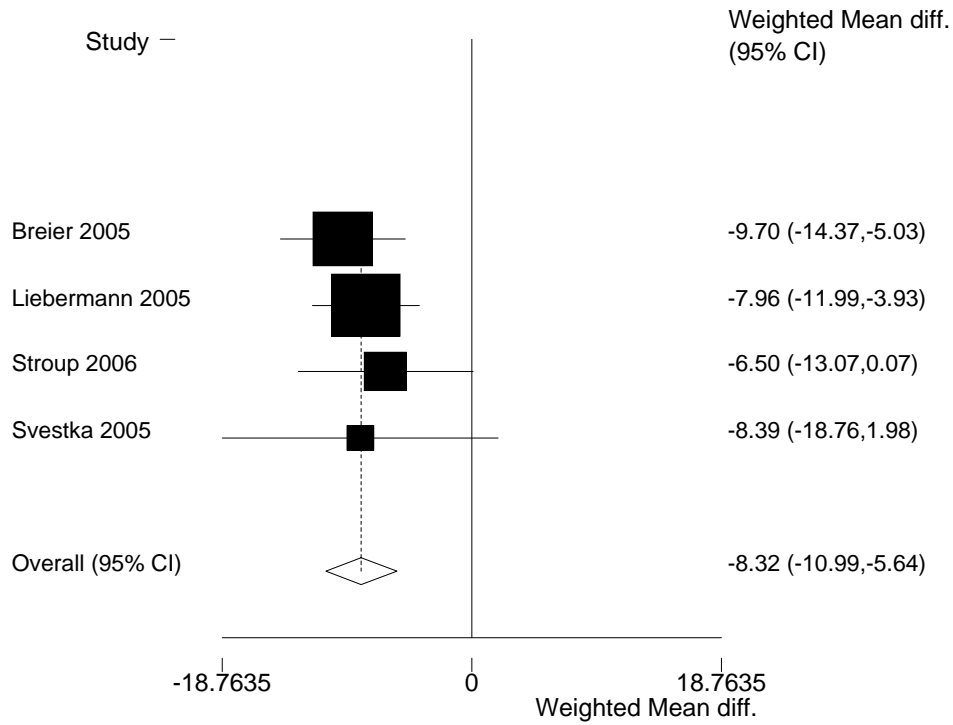

N=1291

Heterogeneity chi-squared = 0.66 (d.f. = 3) p = 0.882

Estimate of between-study variance Tau-squared = 0.0000

Test of WMD=0 : z= 6.09 p = 0.000



**Figure I. 5. a: PANSS total score - Quetiapine versus Clozapine**

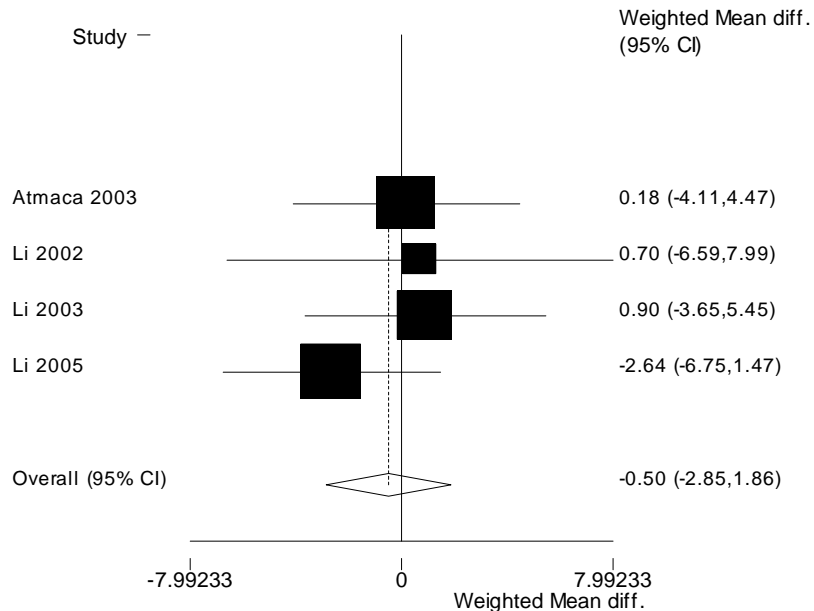

N=232

Heterogeneity chi-squared = 1.61 (d.f. = 3) p = 0.658

Estimate of between-study variance Tau-squared = 0.0000

Test of WMD=0 : z= 0.41 p = 0.679

**Figure I. 5. b: PANSS total score - Quetiapine versus Olanzapine**

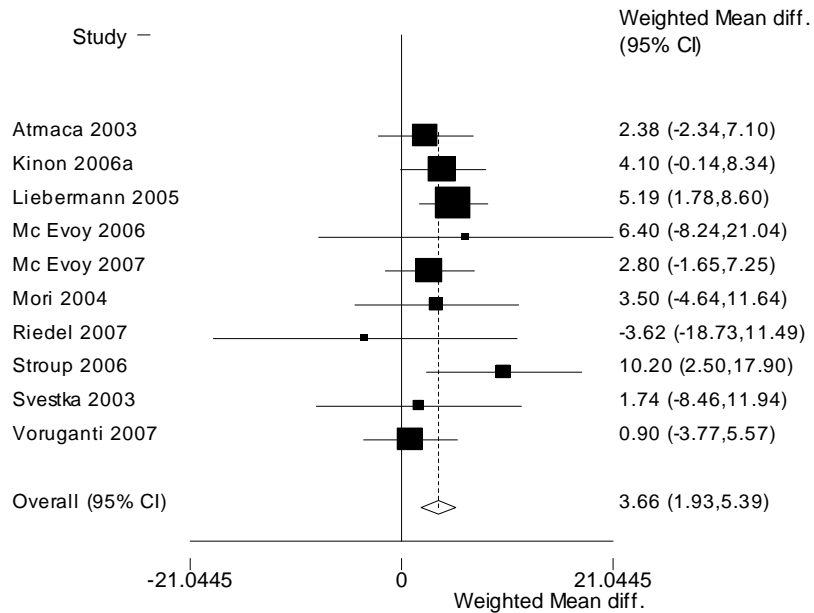

N=1449

Heterogeneity chi-squared = 6.52 (d.f. = 9) p = 0.687

Estimate of between-study variance Tau-squared = 0.0000

Test of WMD=0 : z= 4.14 p = 0.000

**Figure I. 5. c: PANSS total score - Quetiapine versus Risperidone**

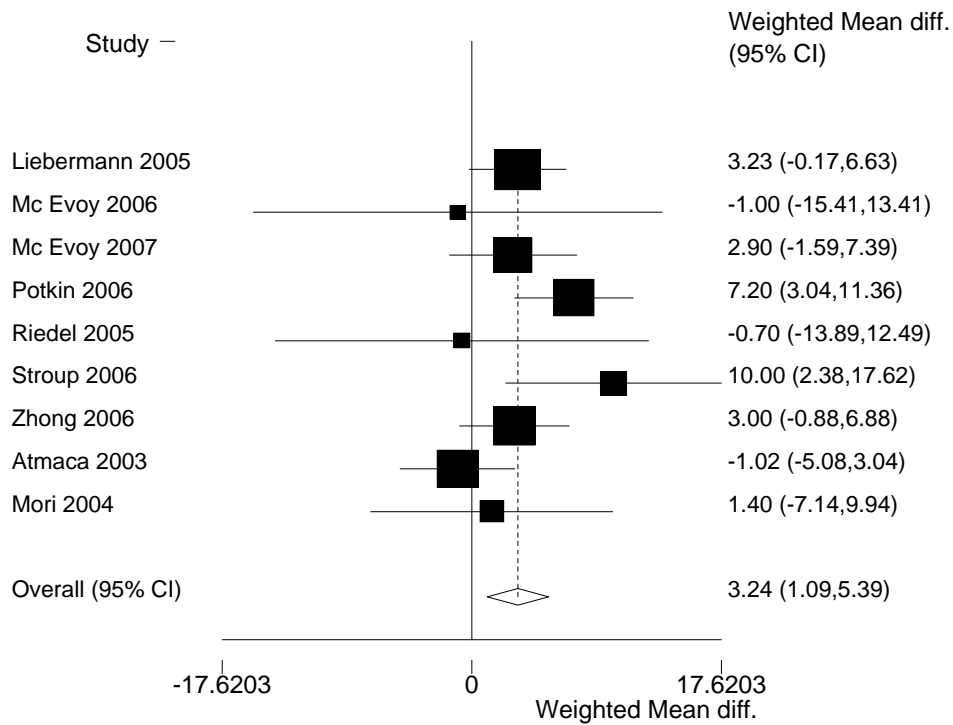

N=1953

Heterogeneity chi-squared = 11.64 (d.f. = 8) p = 0.168

Estimate of between-study variance Tau-squared = 3.1314

Test of WMD=0 : z = 2.95 p = 0.003

**Figure I. 5. d: PANSS total score - Quetiapine versus Ziprasidone**

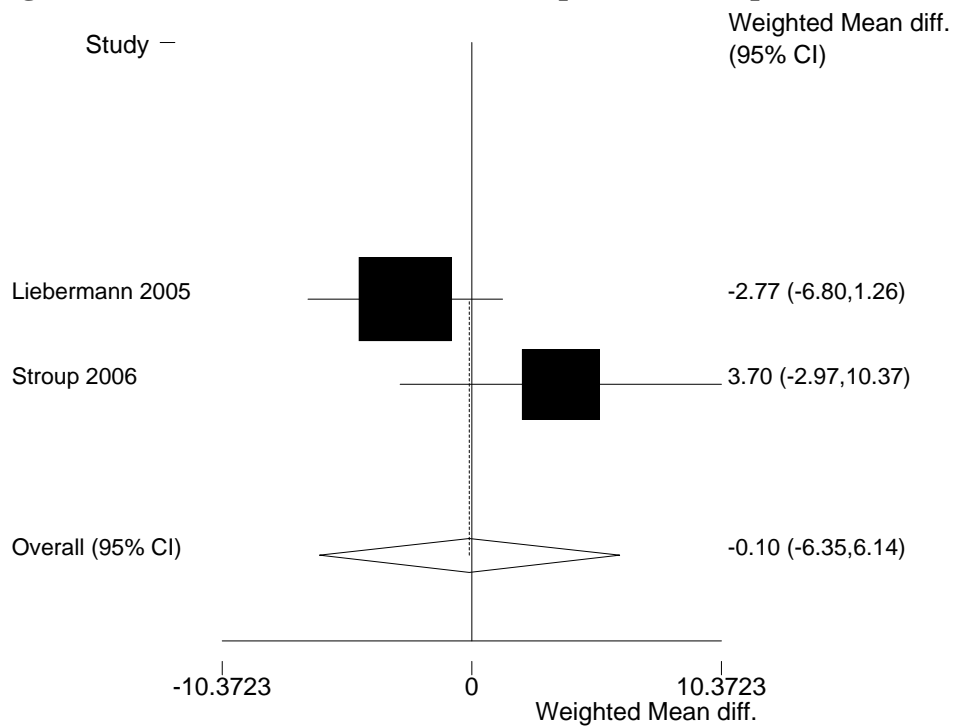

N=710

Heterogeneity chi-squared = 2.65 (d.f. = 1) p = 0.104

Estimate of between-study variance Tau-squared = 13.0191

Test of WMD=0 : z = 0.03 p = 0.974

**Figure I. 6. a: PANSS total score - Risperidone versus Amisulpride**

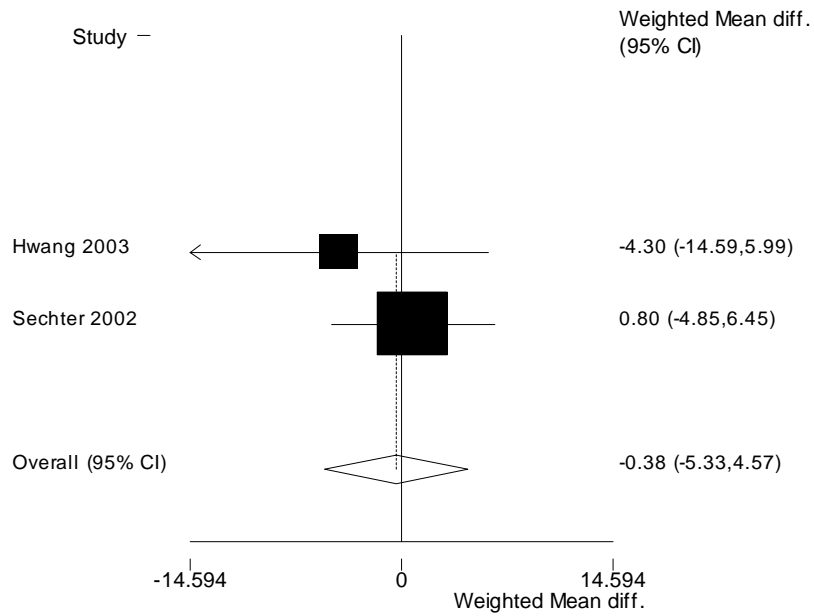

N=291

Heterogeneity chi-squared = 0.72 (d.f. = 1) p = 0.395

Estimate of between-study variance Tau-squared = 0.0000

Test of WMD=0 : z= 0.15 p = 0.880

**Figure I. 6. b: PANSS total score - Risperidone versus Aripiprazole**

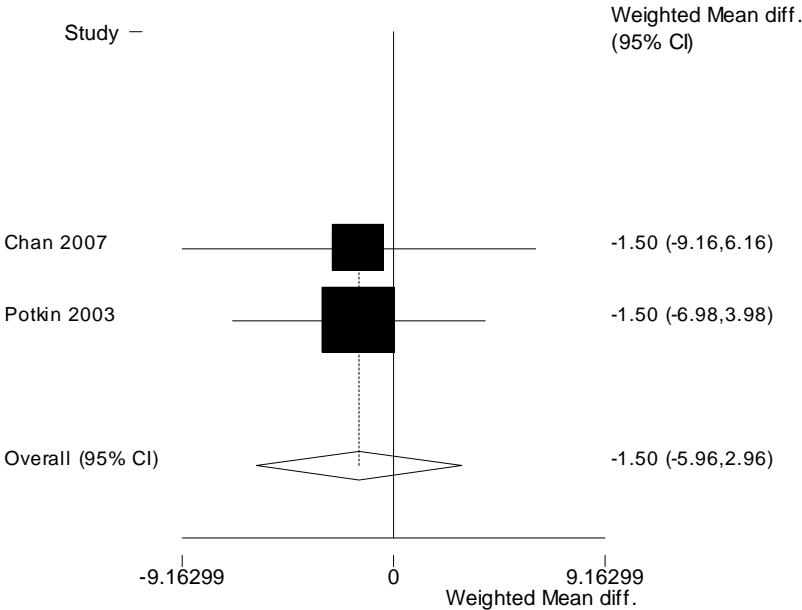

N=372  
 Heterogeneity chi-squared = 0.00 (d.f. = 1) p = 1.000  
 Estimate of between-study variance Tau-squared = 0.0000  
 Test of WMD=0 : z= 0.66 p = 0.509

**Figure I. 6. c: PANSS total score - Risperidone versus Clozapine**

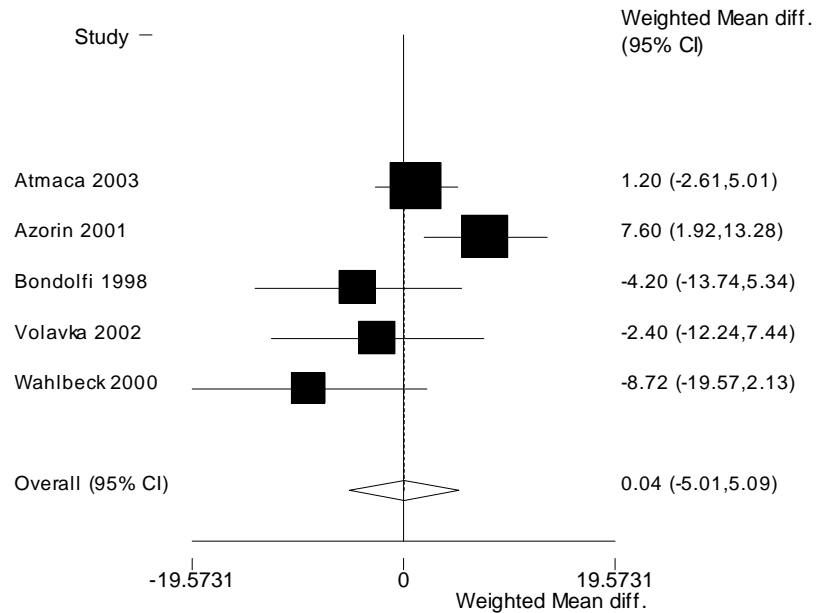

N=466

Heterogeneity chi-squared = 9.81 (d.f. = 4) p = 0.044

Estimate of between-study variance Tau-squared = 18.1717

Test of WMD=0 : z= 0.02 p = 0.987

**Figure I. 6. d: PANSS total score - Risperidone versus Olanzapine**

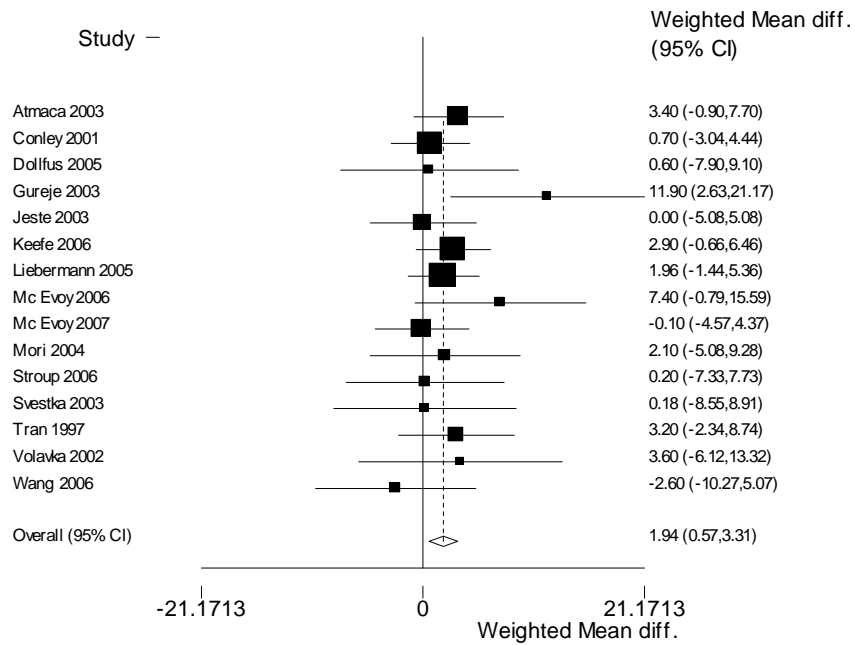

N=2404

Heterogeneity chi-squared = 10.76 (d.f. = 14) p = 0.704

Estimate of between-study variance Tau-squared = 0.0000

Test of WMD=0 : z = 2.77 p = 0.006



**Figure I. 6. e: PANSS total score - Risperidone versus Quetiapine**

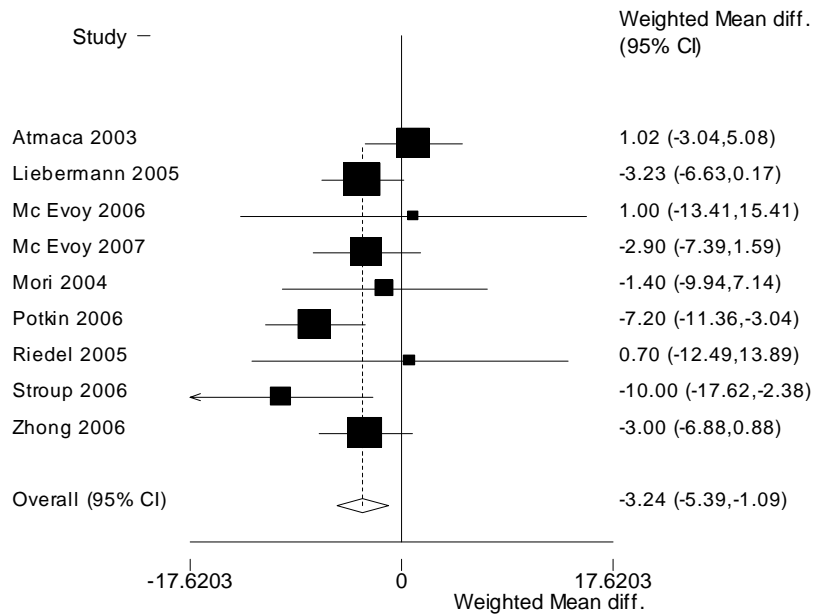

N=1953

Heterogeneity chi-squared = 11.64 (d.f. = 8) p = 0.168

Estimate of between-study variance Tau-squared = 3.1314

Test of WMD=0 : z= 2.95 p = 0.003

**Figure I. 6. f: PANSS total score - Risperidone versus Sertindole**

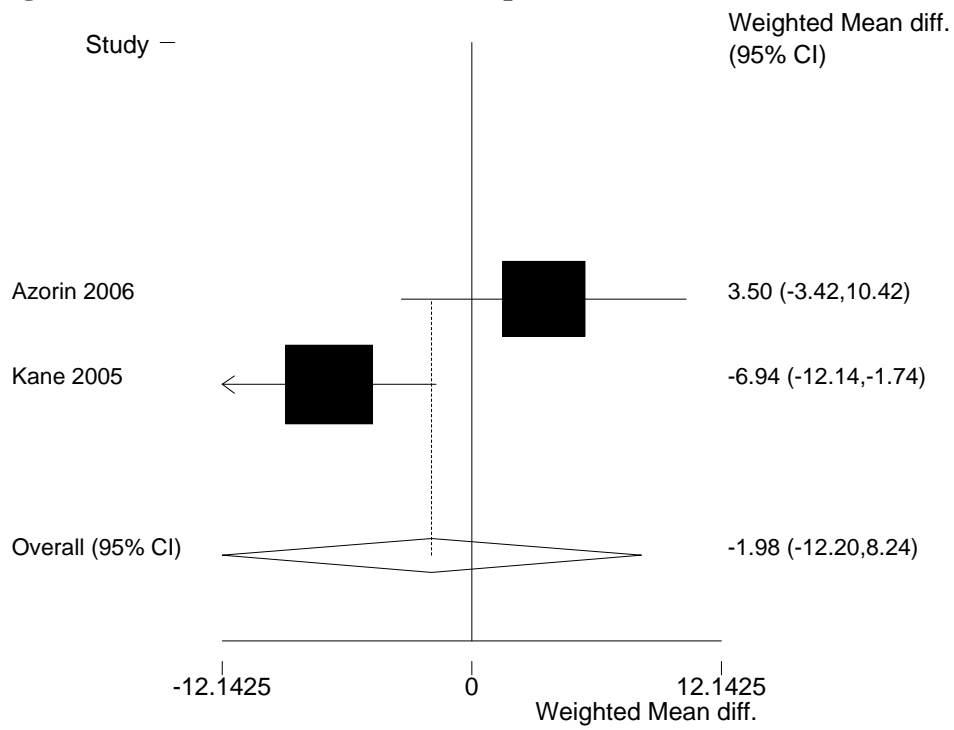

N=493

Heterogeneity chi-squared = 5.59 (d.f. = 1) p = 0.018

Estimate of between-study variance Tau-squared = 44.7410

Test of WMD=0 : z= 0.38 p = 0.704

**Figure I. 6. g: PANSS total score - Risperidone versus Ziprasidone**

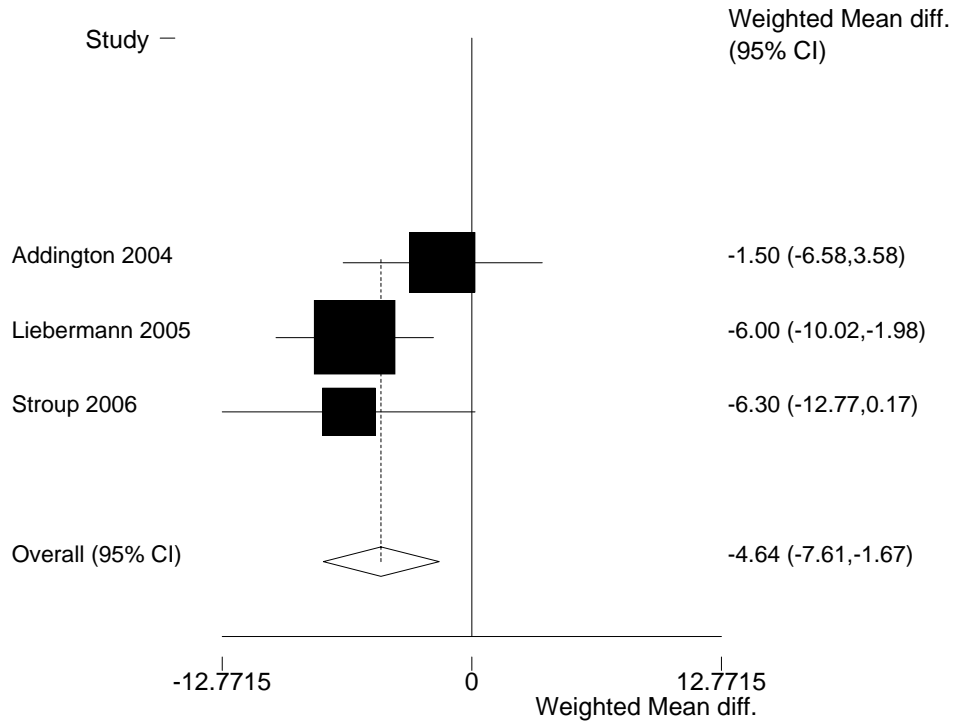

N=1016

Heterogeneity chi-squared = 2.16 (d.f. = 2) p = 0.340

Estimate of between-study variance Tau-squared = 0.5305

Test of WMD=0 : z= 3.06 p = 0.002

**Figure I. 7. a: PANSS total score - Sertindole versus Risperidone**

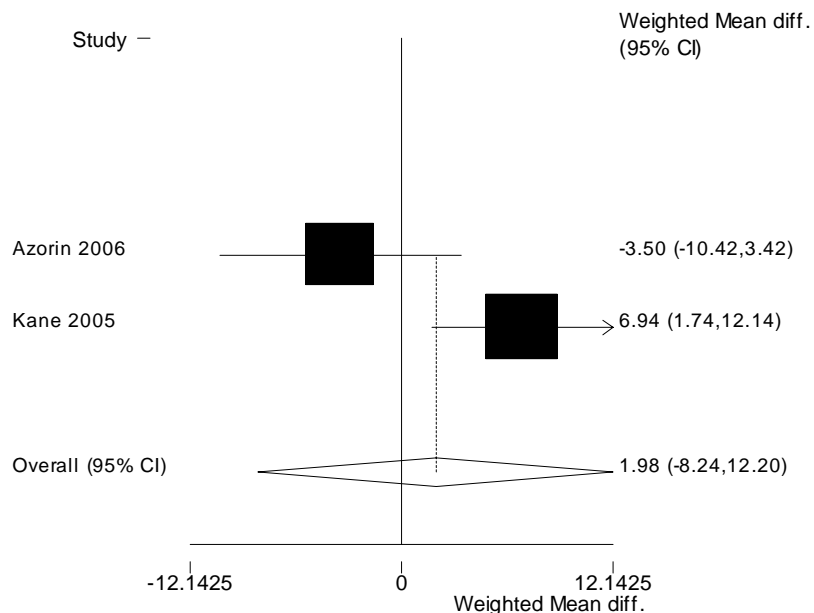

N=493

Heterogeneity chi-squared = 5.59 (d.f. = 1) p = 0.018

Estimate of between-study variance Tau-squared = 44.7410

Test of WMD=0 : z= 0.38 p = 0.704

**Figure I. 8. a: PANSS total score - Ziprasidone versus Amisulpride**

| Study          | WMD | [95% Conf. Interval] |
|----------------|-----|----------------------|
| Olie 2006      | 2.7 | -3.54949 8.94949     |
| I-V pooled WMD | 2.7 | -3.54949 8.94949     |

N=122

Test of WMD=0 : z= 0.85 p = 0.397

**Figure I. 8. b: PANSS total score - Ziprasidone versus Clozapine**

| Study          | WMD | [95% Conf. Interval] |
|----------------|-----|----------------------|
| Sacchetti 2006 | -.5 | -7.7187 6.7187       |
| I-V pooled WMD | -.5 | -7.7187 6.7187       |

N=146

Test of WMD=0 : z= 0.14 p = 0.892

**Figure I. 8. c: PANSS total score - Ziprasidone versus Olanzapine**

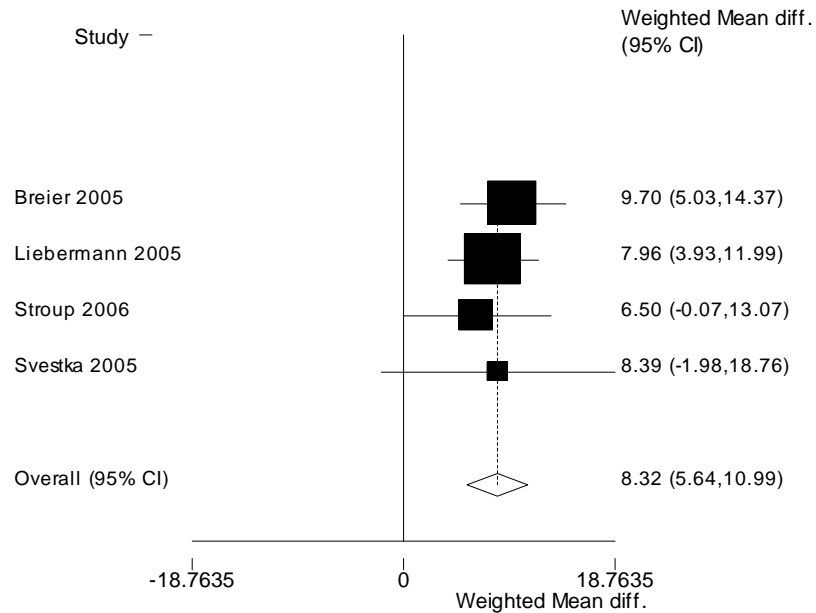

N=1291

Heterogeneity chi-squared = 0.66 (d.f. = 3) p = 0.882

Estimate of between-study variance Tau-squared = 0.0000

Test of WMD=0 : z = 6.09 p = 0.000

**Figure I. 8. d: PANSS total score - Ziprasidone versus Quetiapine**

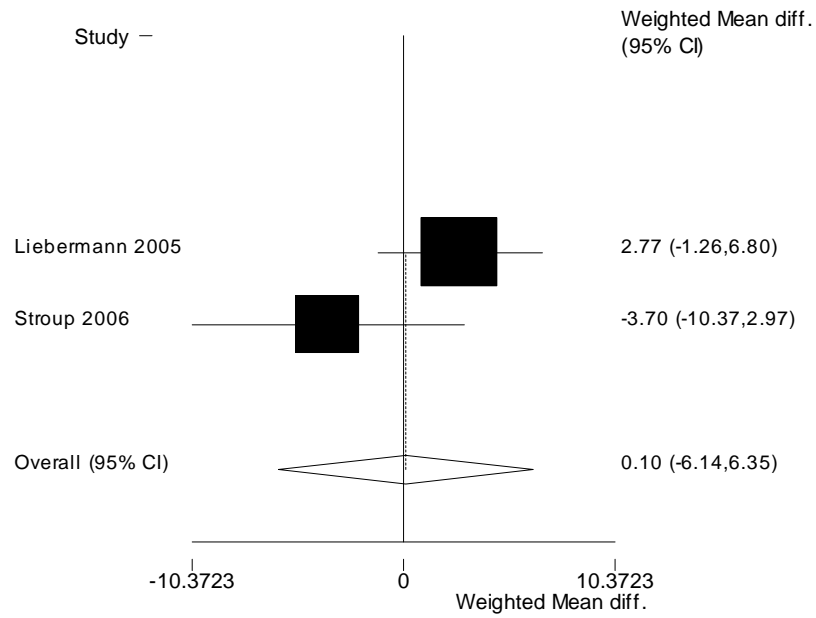

N=710

Heterogeneity chi-squared = 2.65 (d.f. = 1) p = 0.104

Estimate of between-study variance Tau-squared = 13.0191

Test of WMD=0 : z = 0.03 p = 0.974

**Figure I. 8. e: PANSS total score - Ziprasidone versus Risperidone**

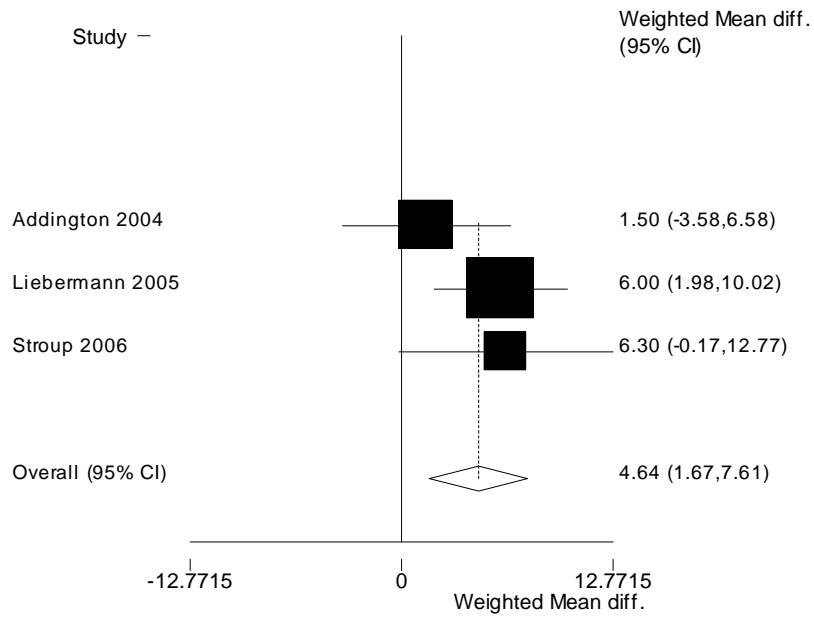

N=1016

Heterogeneity chi-squared = 2.16 (d.f. = 2) p = 0.340

Estimate of between-study variance Tau-squared = 0.5305

Test of WMD=0 : z= 3.06 p = 0.002

**Figures II. 1. a – II. 8. d : PANSS positive subscore (weighted mean difference, WMD)**

**Figure II. 1. a: PANSS positive subscore - Amisulpride versus Olanzapine**

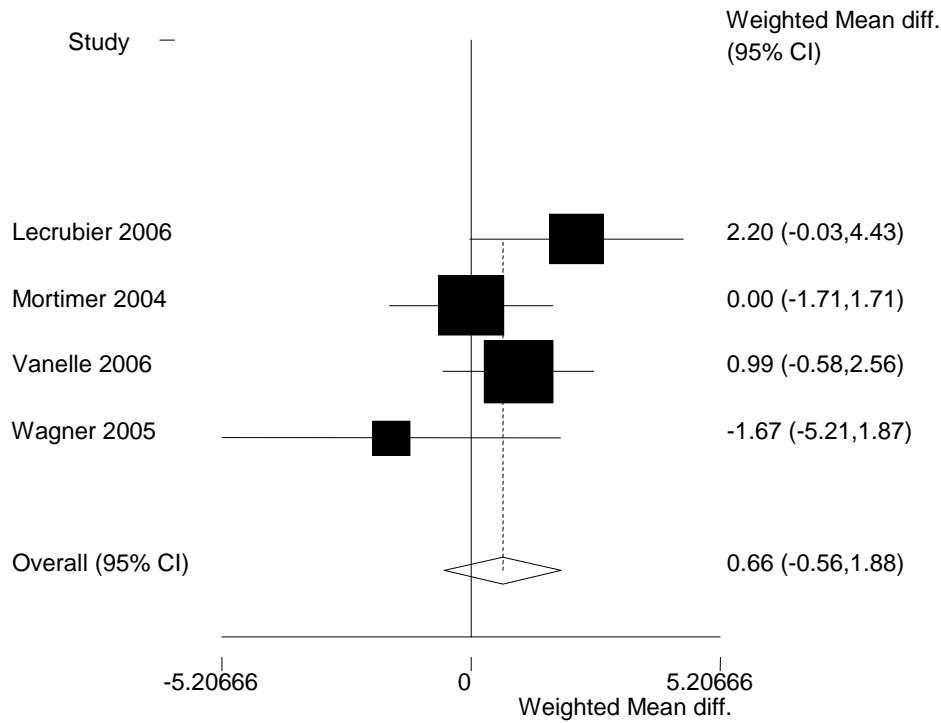

N=701

Heterogeneity chi-squared = 4.24 (d.f. = 3) p = 0.237

Estimate of between-study variance Tau-squared = 0.4543

Test of WMD=0 : z= 1.06 p = 0.287



**Figure II. 1. b: PANSS positive subscore - Amisulpride versus Risperidone**

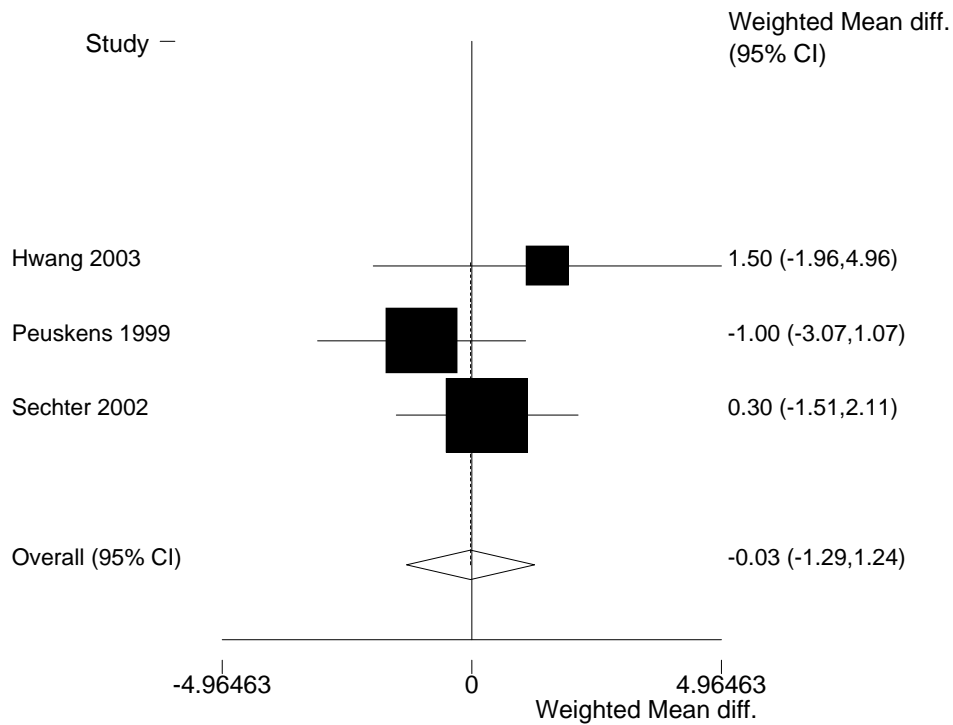

N=519

Heterogeneity chi-squared = 1.72 (d.f. = 2) p = 0.423

Estimate of between-study variance Tau-squared = 0.0000

Test of WMD=0 : z = 0.04 p = 0.966

**Figure II. 2. a: PANSS positive subscore - Aripiprazole versus Risperidone**

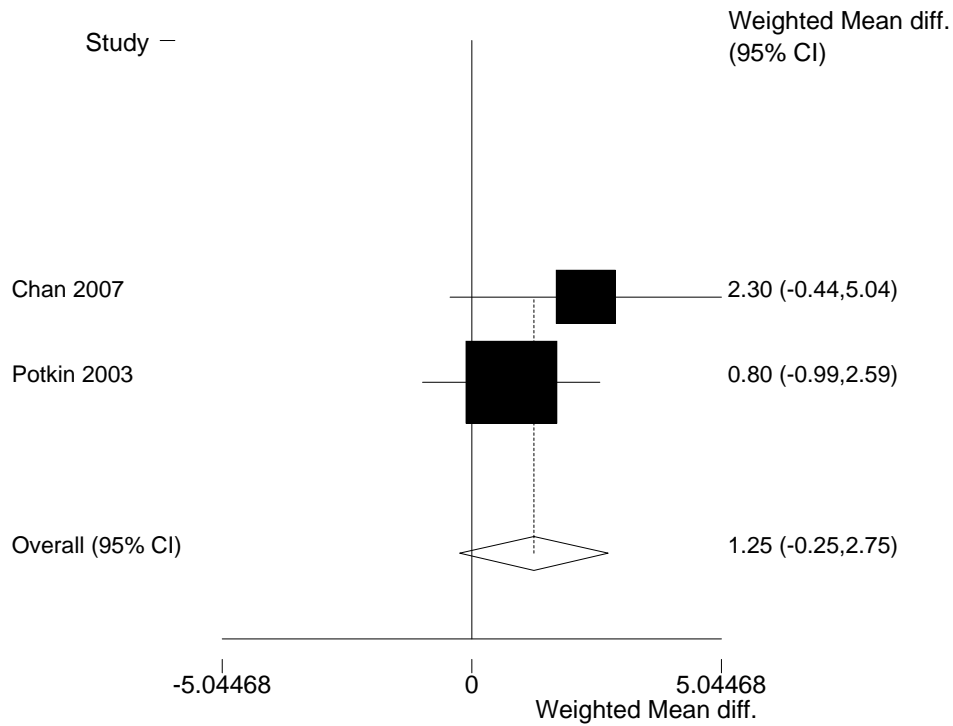

N=372

Heterogeneity chi-squared = 0.80 (d.f. = 1) p = 0.370

Estimate of between-study variance Tau-squared = 0.0000

Test of WMD=0 : z= 1.63 p = 0.103

**Figure II. 3. a: PANSS positive subscore - Clozapine versus Olanzapine**

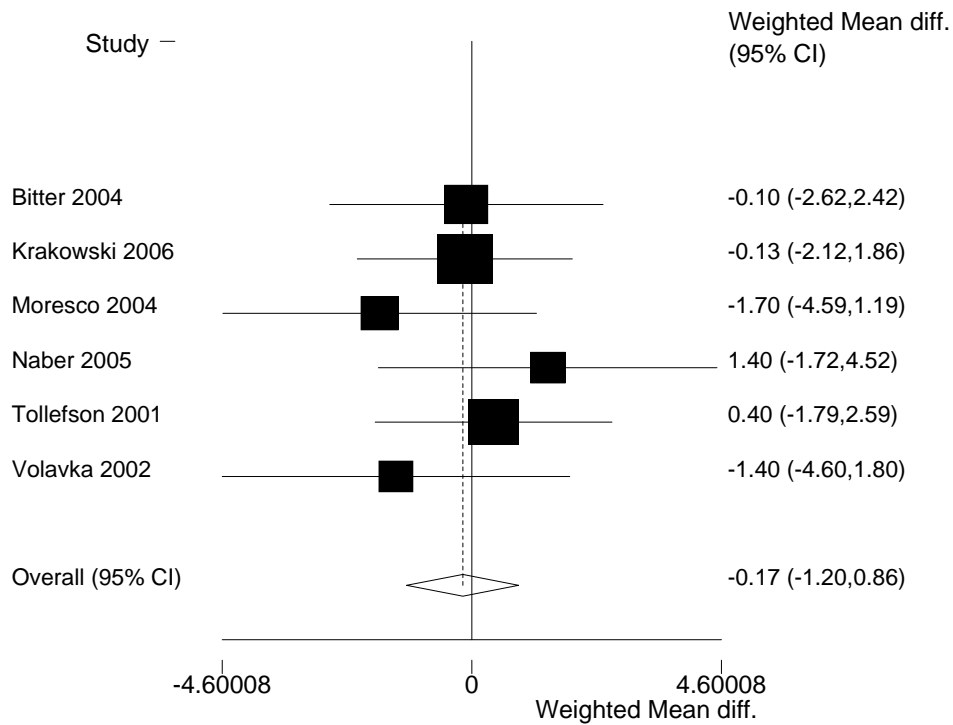

N=593

Heterogeneity chi-squared = 2.88 (d.f. = 5) p = 0.718

Estimate of between-study variance Tau-squared = 0.0000

Test of WMD=0 : z = 0.33 p = 0.744

**Figure II. 3. b: PANSS positive subscore - Clozapine versus Quetiapine**

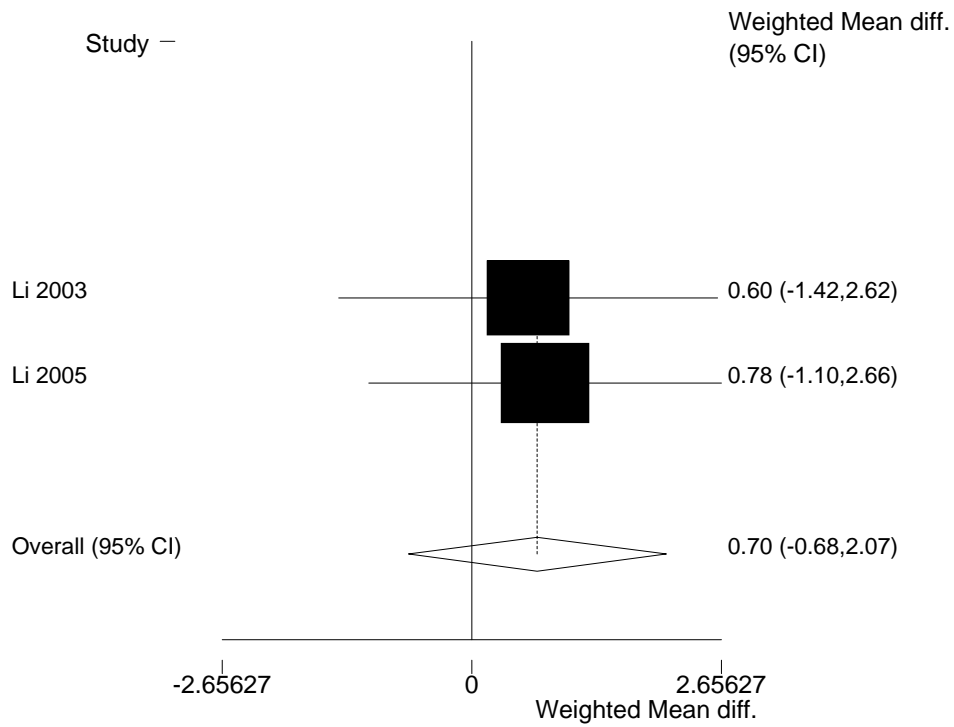

N=142

Heterogeneity chi-squared = 0.02 (d.f. = 1) p = 0.898

Estimate of between-study variance Tau-squared = 0.0000

Test of WMD=0 : z= 0.99 p = 0.320

**Figure II. 3. c: PANSS positive subscore - Clozapine versus Risperidone**

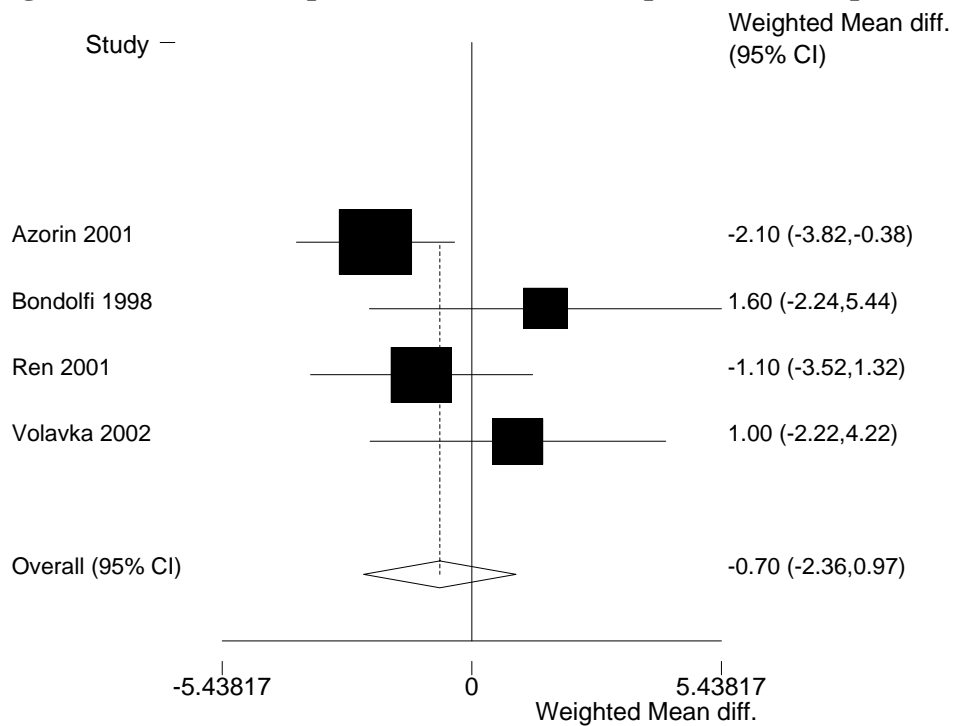

N=541

Heterogeneity chi-squared = 4.83 (d.f. = 3) p = 0.185

Estimate of between-study variance Tau-squared = 1.0815

Test of WMD=0 : z = 0.82 p = 0.412

**Figure II. 3. d: PANSS positive subscore - Clozapine versus Ziprasidone**

| Study          | WMD | [95% Conf. Interval] |
|----------------|-----|----------------------|
| Sacchetti 2006 | -1  | -3.38468 1.38468     |
| I-V pooled WMD | -1  | -3.38468 1.38468     |

N=144

Test of WMD=0 : z = 0.82 p = 0.411

**Figure II. 4. a: PANSS positive subscore - Olanzapine versus Amisulpride**

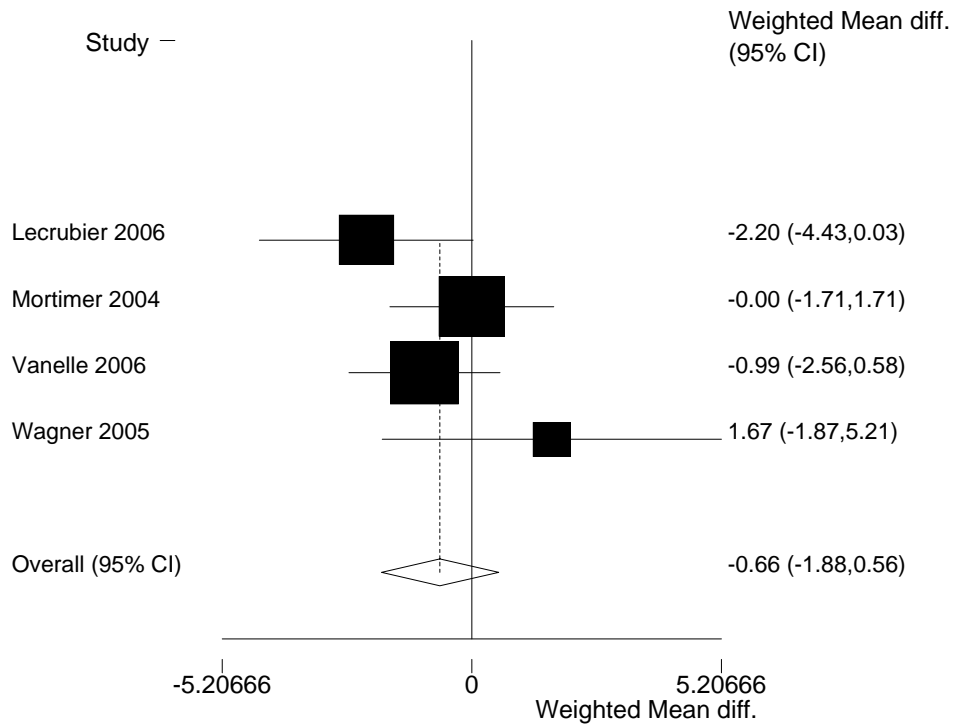

N=701

Heterogeneity chi-squared = 4.24 (d.f. = 3) p = 0.237

Estimate of between-study variance Tau-squared = 0.4543

Test of WMD=0 : z = 1.06 p = 0.287

**Figure II. 4. b: PANSS positive subscore - Olanzapine versus Clozapine**

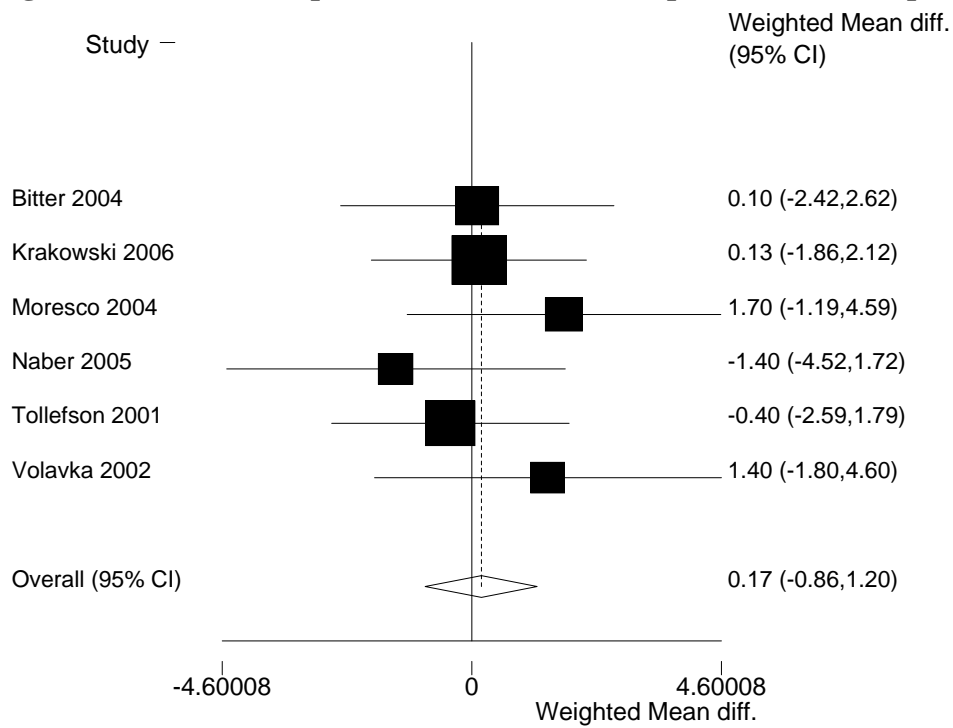

N=593

Heterogeneity chi-squared = 2.88 (d.f. = 5) p = 0.718

Estimate of between-study variance Tau-squared = 0.0000

Test of WMD=0 : z = 0.33 p = 0.744

**Figure II. 4. c: PANSS positive subscore - Olanzapine versus Quetiapine**

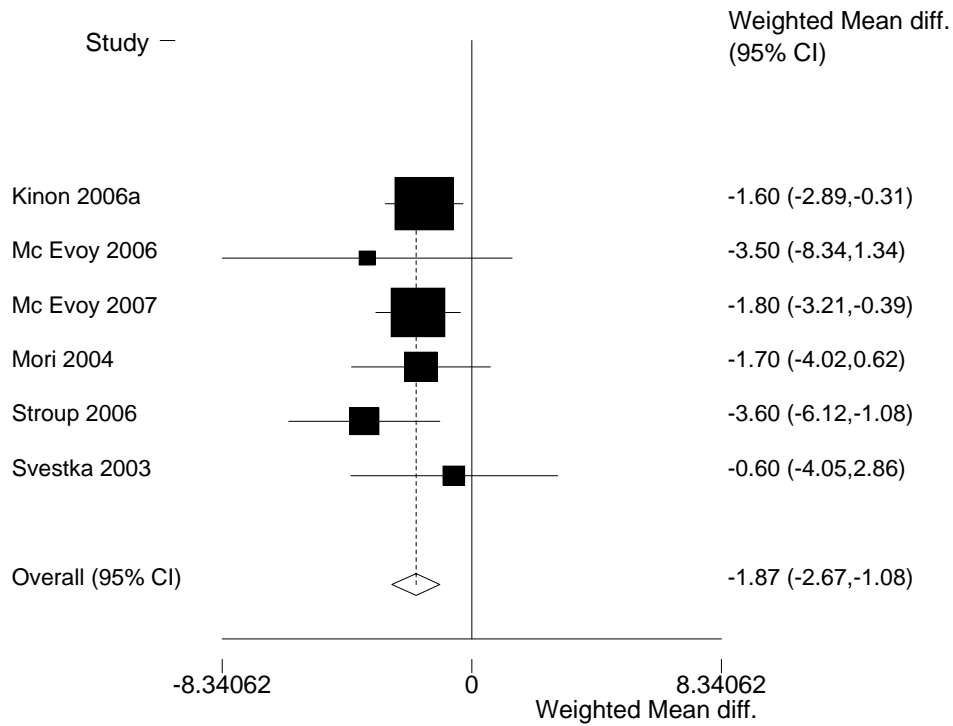

N=646

Heterogeneity chi-squared = 2.97 (d.f. = 5) p = 0.705

Estimate of between-study variance Tau-squared = 0.0000

Test of WMD=0 : z= 4.61 p = 0.000



**Figure II. 4. d: PANSS positive subscore - Olanzapine versus Risperidone**

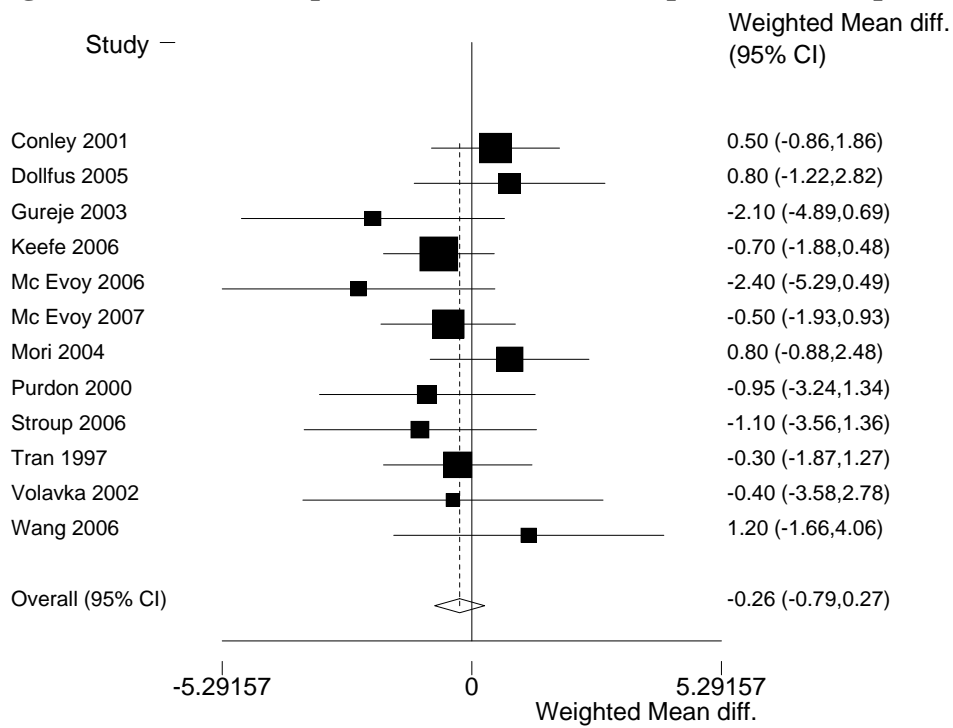

N=1545

Heterogeneity chi-squared = 10.01 (d.f. = 11) p = 0.529

Estimate of between-study variance Tau-squared = 0.0000

Test of WMD=0 : z= 0.97 p = 0.332

**Figure II. 4. e: PANSS positive subscore - Olanzapine versus Ziprasidone**

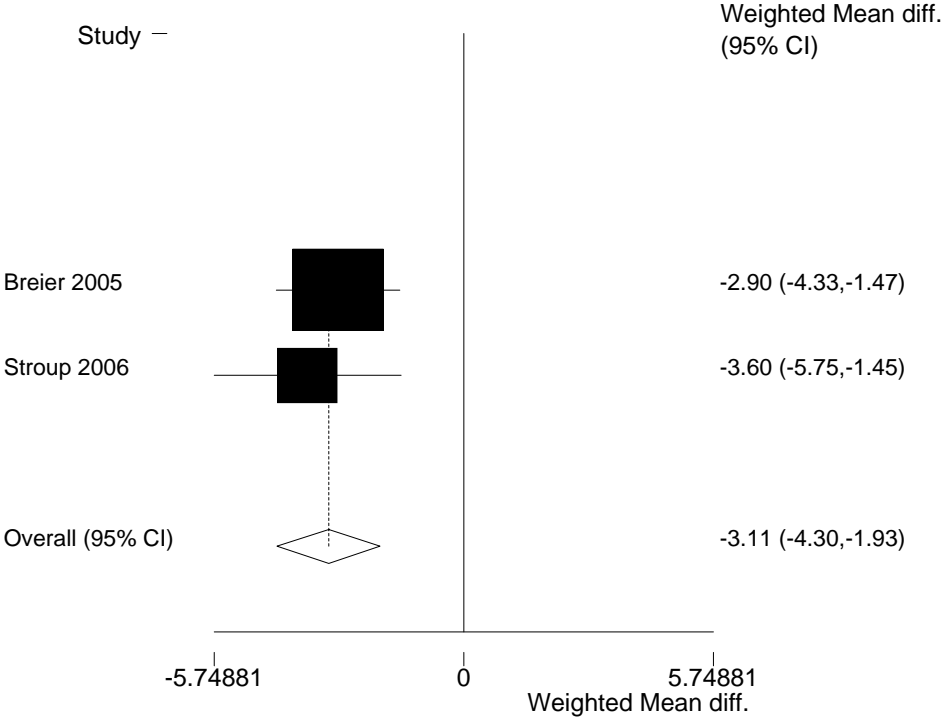

N=730  
 Heterogeneity chi-squared = 0.28 (d.f. = 1) p = 0.595  
 Estimate of between-study variance Tau-squared = 0.0000  
 Test of WMD=0 : z= 5.14 p = 0.000

**Figure II. 5. a: PANSS positive subscore - Quetiapine versus Clozapine**

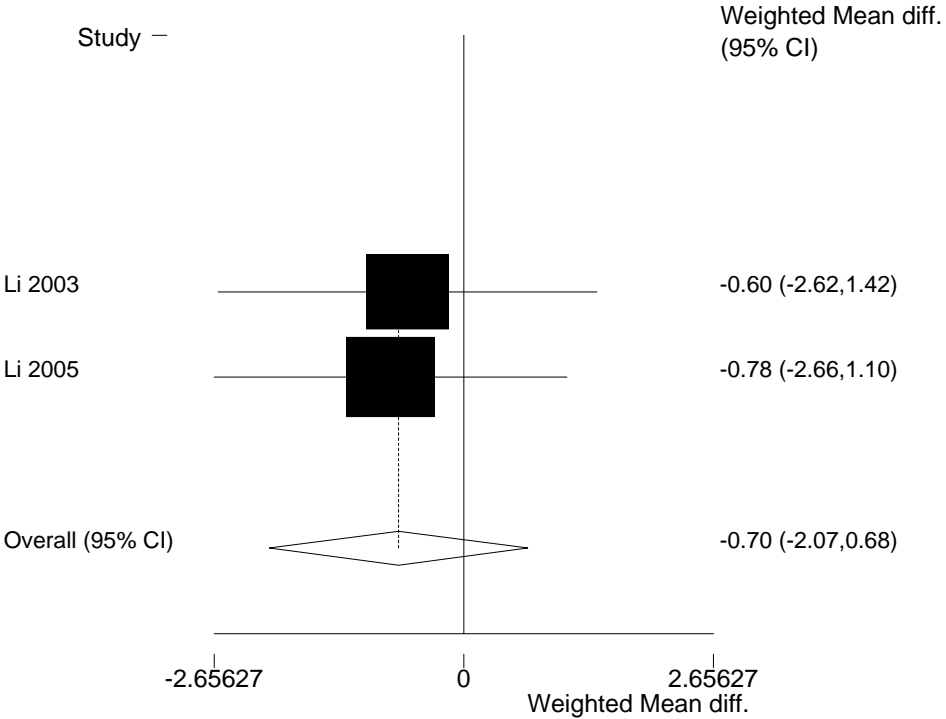

N=142  
 Heterogeneity chi-squared = 0.02 (d.f. = 1) p = 0.898  
 Estimate of between-study variance Tau-squared = 0.0000  
 Test of WMD=0 : z= 0.99 p = 0.320

**Figure II. 5. b: PANSS positive subscore - Quetiapine versus Olanzapine**

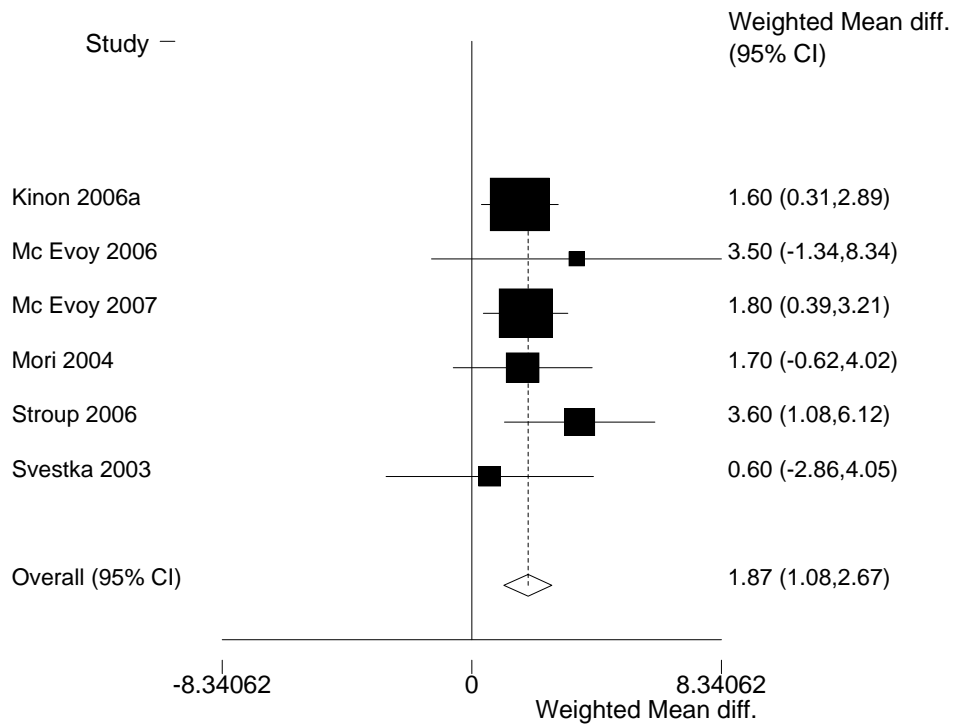

N=646

Heterogeneity chi-squared = 2.97 (d.f. = 5) p = 0.705

Estimate of between-study variance Tau-squared = 0.0000

Test of WMD=0 : z= 4.61 p = 0.000

**Figure II. 5. c: PANSS positive subscore - Quetiapine versus Risperidone**

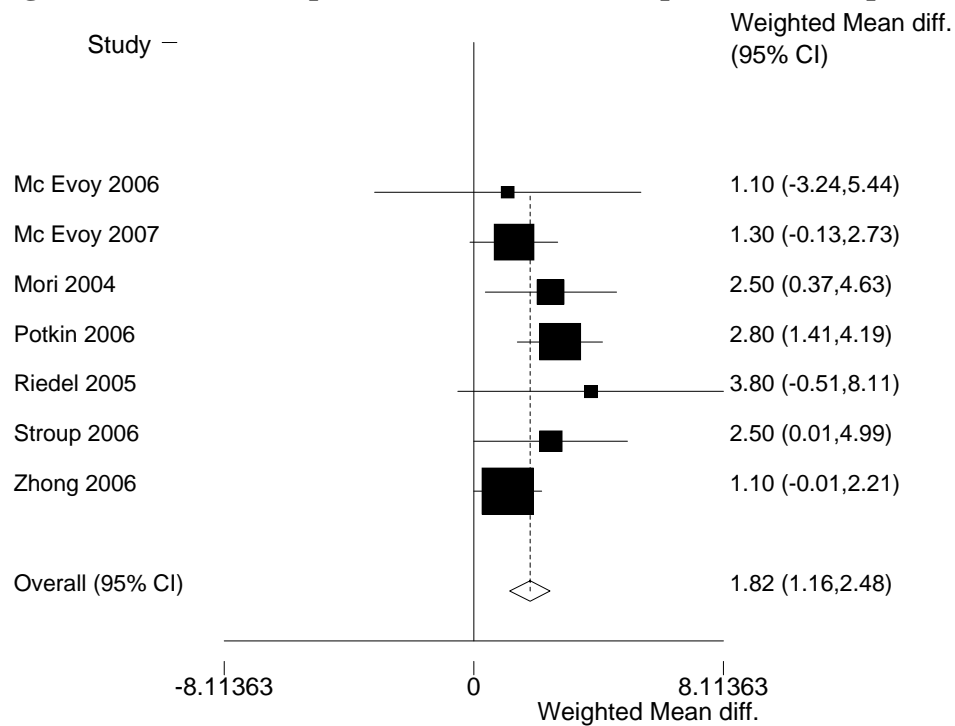

N=1264

Heterogeneity chi-squared = 5.65 (d.f. = 6) p = 0.464

Estimate of between-study variance Tau-squared = 0.0000

Test of WMD=0 : z= 5.42 p = 0.000

**Figure II. 5. d: PANSS positive subscore - Quetiapine versus Ziprasidone**

| Study          | WMD | [95% Conf. Interval] |
|----------------|-----|----------------------|
| Stroup 2006    | 0   | -2.18291 2.18291     |
| I-V pooled WMD | 0   | -2.18291 2.18291     |

N=198

Test of WMD=0 : z= 0.00 p = 1.000

**Figure II. 6. a: PANSS positive subscore - Risperidone versus Amisulpride**

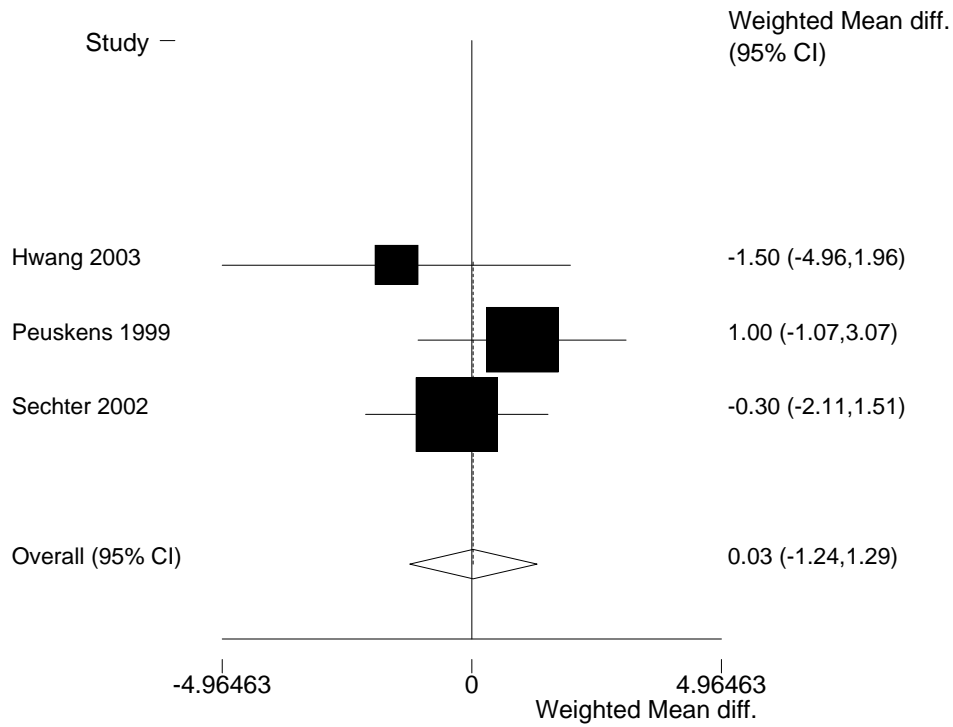

N=519

Heterogeneity chi-squared = 1.72 (d.f. = 2) p = 0.423

Estimate of between-study variance Tau-squared = 0.0000

Test of WMD=0 : z= 0.04 p = 0.966

**Figure II. 6. b: PANSS positive subscore - Risperidone versus Aripiprazole**

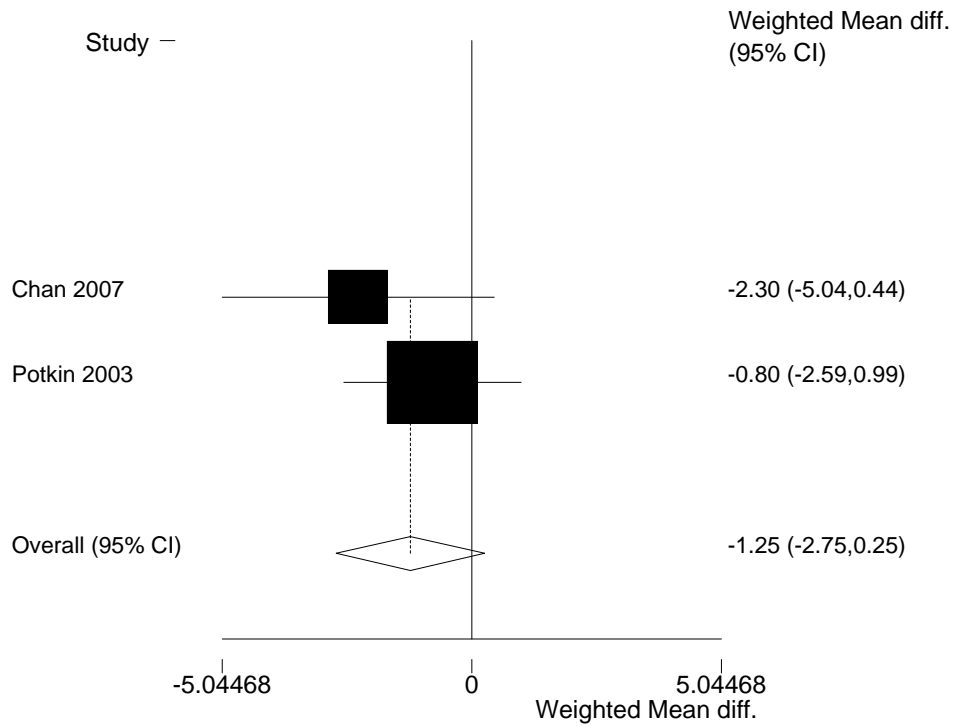

N=372

Heterogeneity chi-squared = 0.80 (d.f. = 1) p = 0.370

Estimate of between-study variance Tau-squared = 0.0000

Test of WMD=0 : z= 1.63 p = 0.103

**Figure II. 6. b: PANSS positive subscore - Risperidone versus Clozapine**

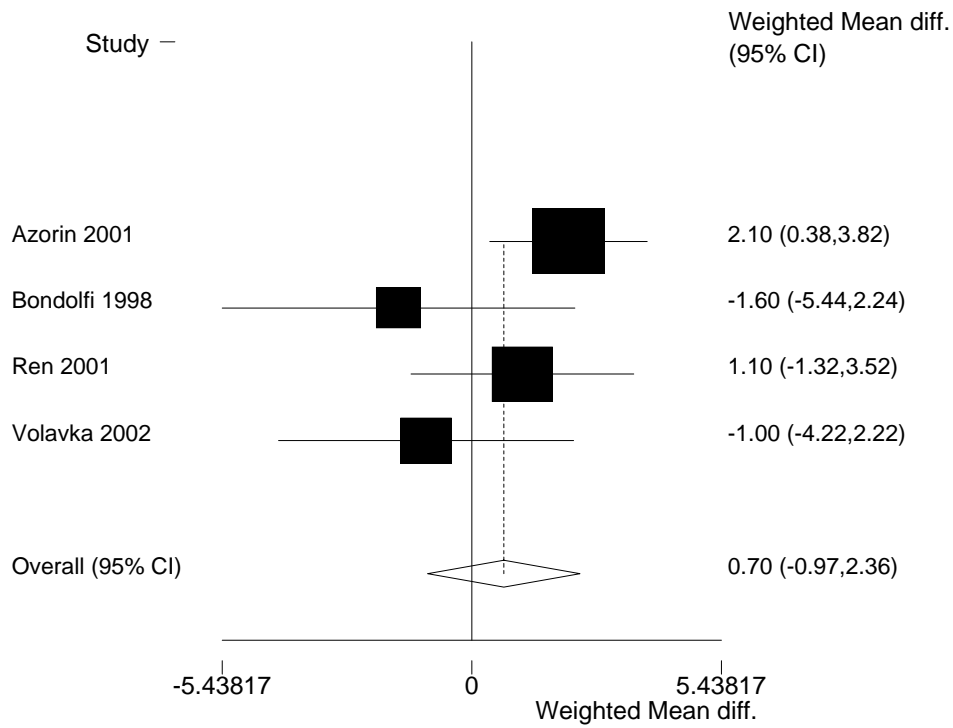

N=541

Heterogeneity chi-squared = 4.83 (d.f. = 3) p = 0.185

Estimate of between-study variance Tau-squared = 1.0815

Test of WMD=0 : z = 0.82 p = 0.412



**Figure II. 6. c: PANSS positive subscore - Risperidone versus Olanzapine**

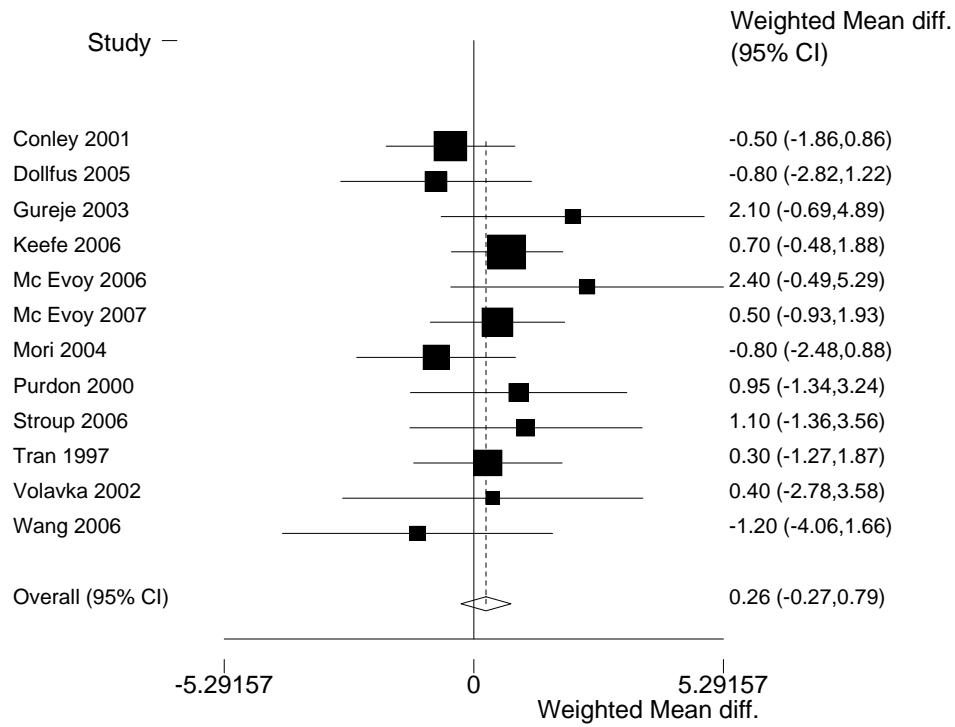

N=1545

Heterogeneity chi-squared = 10.01 (d.f. = 11) p = 0.529

Estimate of between-study variance Tau-squared = 0.0000

Test of WMD=0 : z = 0.97 p = 0.332

**Figure II. 6. d: PANSS positive subscore - Risperidone versus Quetiapine**

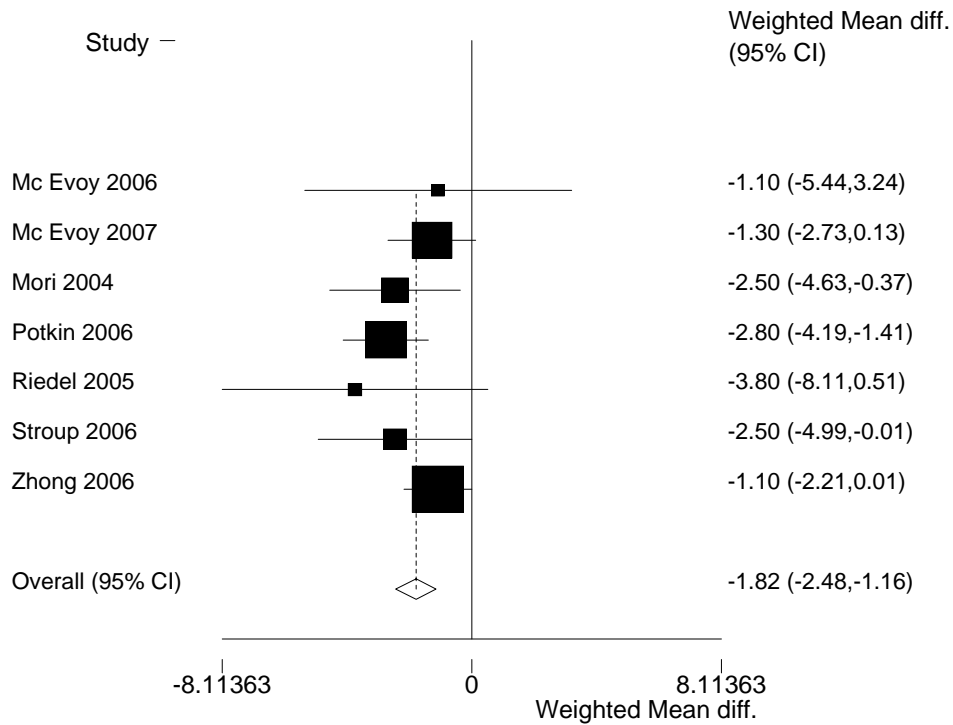

N=1264  
 Heterogeneity chi-squared = 5.65 (d.f. = 6) p = 0.464  
 Estimate of between-study variance Tau-squared = 0.0000  
 Test of WMD=0 : z= 5.42 p = 0.000

**Figure II. 6. e: PANSS positive subscore - Risperidone versus Sertindole**

| Study          | WMD | [95% Conf. Interval] |
|----------------|-----|----------------------|
| Azorin 2006    | .8  | -1.35479 2.95479     |
| I-V pooled WMD | .8  | -1.35479 2.95479     |

N=172  
 Test of WMD=0 : z= 0.73 p = 0.467

**Figure II. 6. f: PANSS positive subscore - Risperidone versus Ziprasidone**

| Study          | WMD  | [95% Conf. Interval] |
|----------------|------|----------------------|
| Stroup 2006    | -2.5 | -4.61721 -.382794    |
| I-V pooled WMD | -2.5 | -4.61721 -.382794    |

N=204  
 Test of WMD=0 : z= 2.31 p = 0.021

**Figure II. 7. a: PANSS positive subscore - Sertindole versus Risperidone**

| Study          | WMD | [95% Conf. Interval] |
|----------------|-----|----------------------|
| Azorin 2006    | -.8 | -2.95479 1.35479     |
| I-V pooled WMD | -.8 | -2.95479 1.35479     |

N=172

Test of WMD=0 : z= 0.73 p = 0.467

**Figure II. 8. a: PANSS positive subscore - Ziprasidone versus Clozapine**

| Study          | WMD | [95% Conf. Interval] |
|----------------|-----|----------------------|
| Sacchetti 2006 | 1   | -1.38468 3.38468     |
| I-V pooled WMD | 1   | -1.38468 3.38468     |

N=144

Test of WMD=0 : z= 0.82 p = 0.411

**Figure II. 8. b: PANSS positive subscore - Ziprasidone versus Olanzapine**

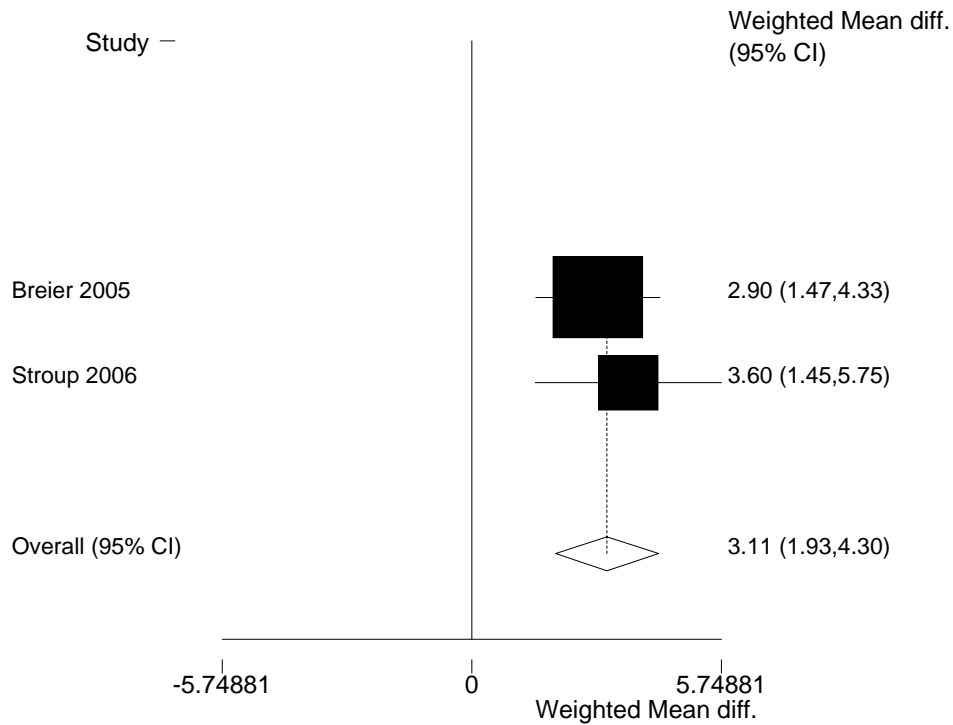

N=730

Heterogeneity chi-squared = 0.28 (d.f. = 1) p = 0.595

Estimate of between-study variance Tau-squared = 0.0000

Test of WMD=0 : z= 5.14 p = 0.000

**Figure II. 8. c: PANSS positive subscore - Ziprasidone versus Quetiapine**

| Study          | WMD      | [95% Conf. Interval] |
|----------------|----------|----------------------|
| Stroup 2006    | -3.0e-09 | -2.18291 2.18291     |
| I-V pooled WMD | -3.0e-09 | -2.18291 2.18291     |

N=198

Test of WMD=0 : z= 0.00 p = 1.000

**Figure II. 8. d: PANSS positive subscore - Ziprasidone versus Risperidone**

| Study          | WMD | [95% Conf. Interval] |
|----------------|-----|----------------------|
| Stroup 2006    | 2.5 | .382793 4.61721      |
| I-V pooled WMD | 2.5 | .382794 4.61721      |

N=204

Test of WMD=0 : z= 2.31 p = 0.021

**Figures III. 1. a – III. 8. d : PANSS negative subscore (weighted mean difference, WMD)**

**Figure III. 1. a: PANSS negative subscore - Amisulpride versus Olanzapine**

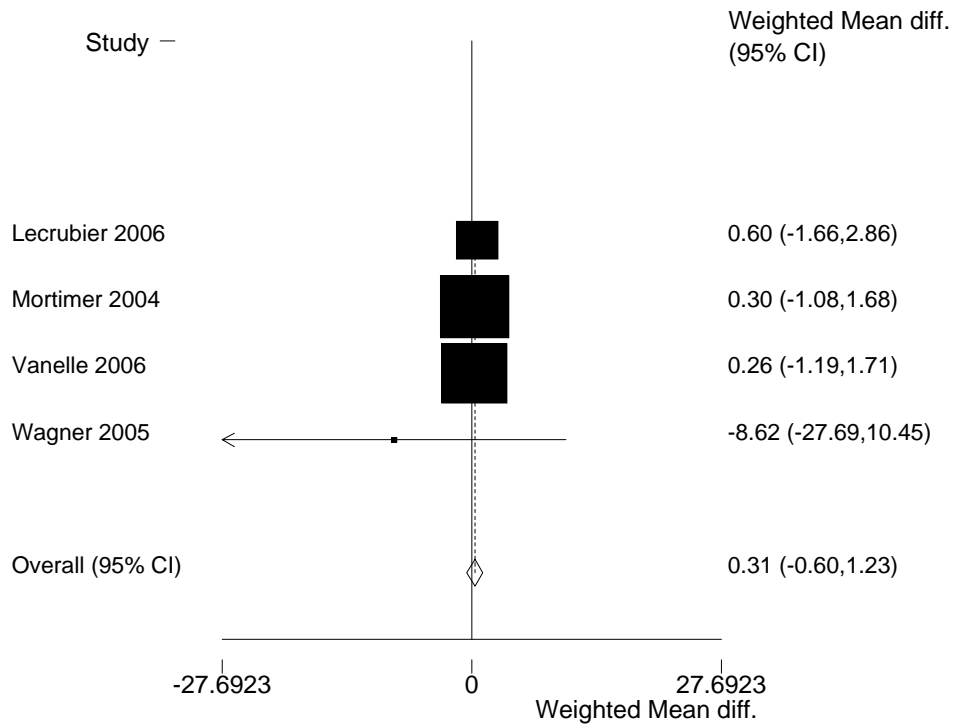

N=698

Heterogeneity chi-squared = 0.91 (d.f. = 3) p = 0.823

Estimate of between-study variance Tau-squared = 0.0000

Test of WMD=0 : z = 0.67 p = 0.502

**Figure III. 1. b: PANSS negative subscore - Amisulpride versus Risperidone**

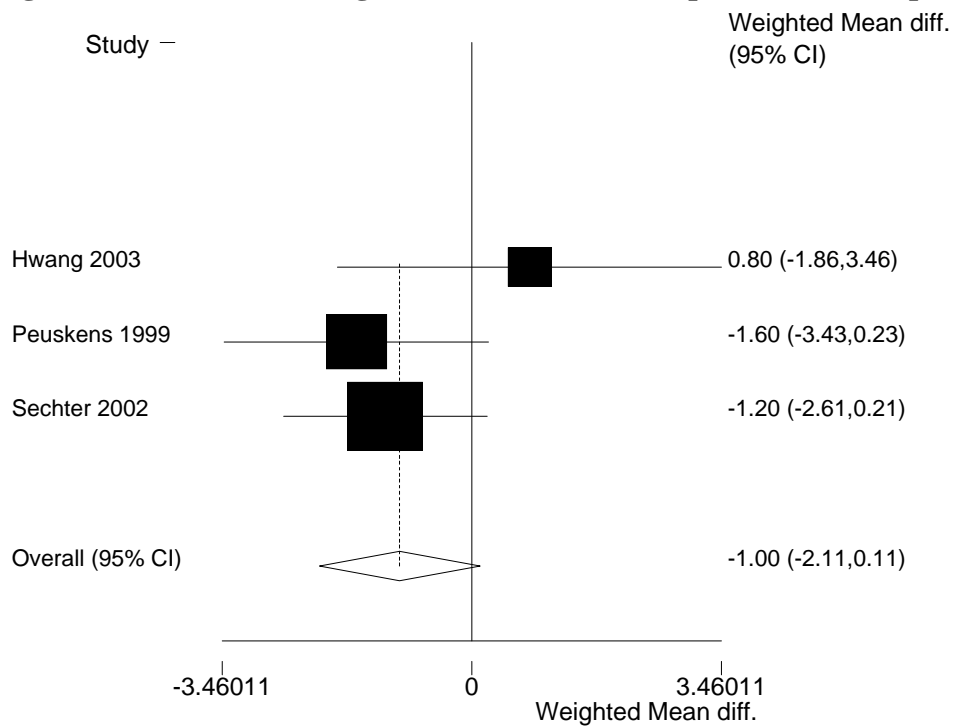

N=519

Heterogeneity chi-squared = 2.25 (d.f. = 2) p = 0.325

Estimate of between-study variance Tau-squared = 0.1144

Test of WMD=0 : z = 1.76 p = 0.078

**Figure III. 1. c: PANSS negative subscore - Amisulpride versus Ziprasidone**

| Study          | WMD | [95% Conf. Interval] |
|----------------|-----|----------------------|
| Olie 2006      | -.8 | -3.01218 1.41218     |
| I-V pooled WMD | -.8 | -3.01218 1.41218     |

N=122

Test of WMD=0 : z = 0.71 p = 0.478

**Figure III. 2. a: PANSS negative subscore - Aripiprazole versus Risperidone**

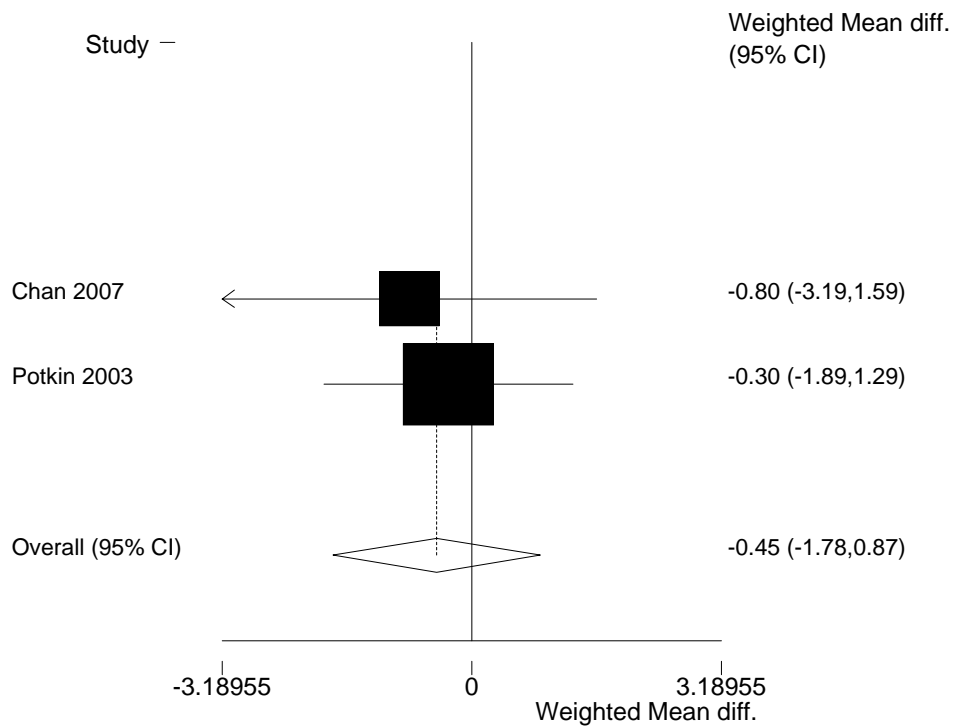

N=372

Heterogeneity chi-squared = 0.12 (d.f. = 1) p = 0.733

Estimate of between-study variance Tau-squared = 0.0000

Test of WMD=0 : z= 0.67 p = 0.502

**Figure III. 3. a: PANSS negative subscore - Clozapine versus Olanzapine**

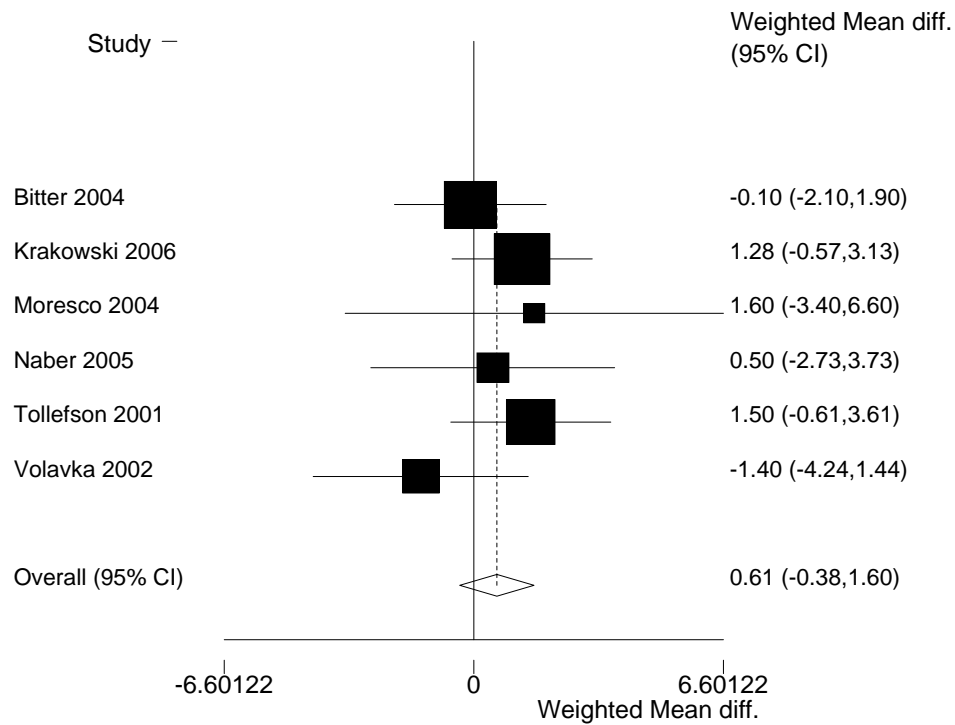

N=593

Heterogeneity chi-squared = 3.74 (d.f. = 5) p = 0.587

Estimate of between-study variance Tau-squared = 0.0000

Test of WMD=0 : z= 1.21 p = 0.227



**Figure III. 3. b: PANSS negative subscore - Clozapine versus Quetiapine**

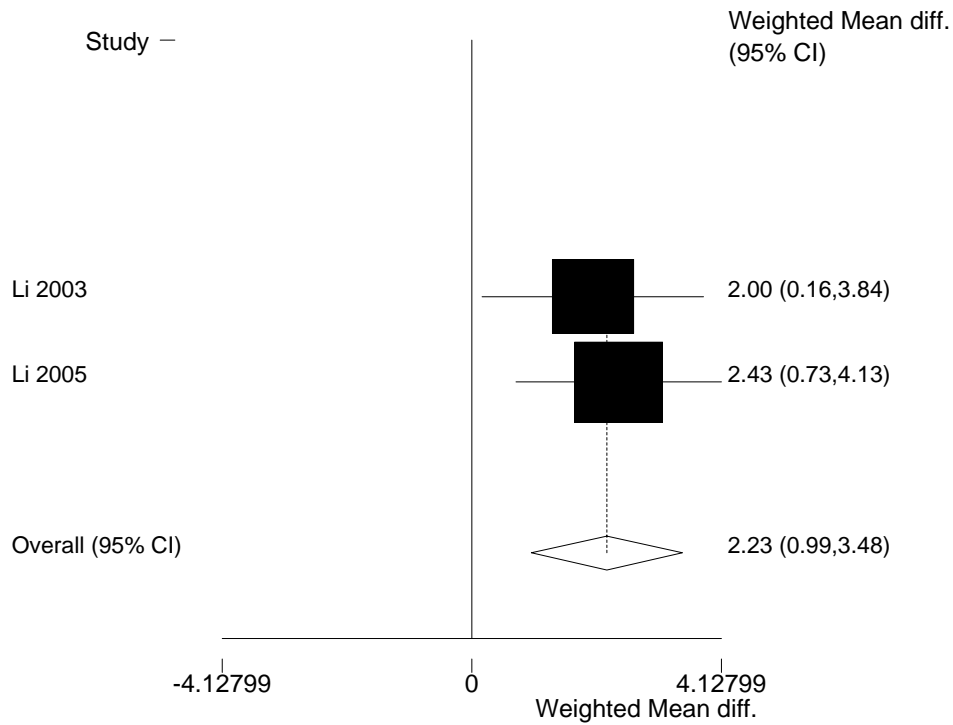

N=142

Heterogeneity chi-squared = 0.11 (d.f. = 1) p = 0.736

Estimate of between-study variance Tau-squared = 0.0000

Test of WMD=0 : z= 3.51 p = 0.000

**Figure III. 3. c: PANSS negative subscore - Clozapine versus Risperidone**

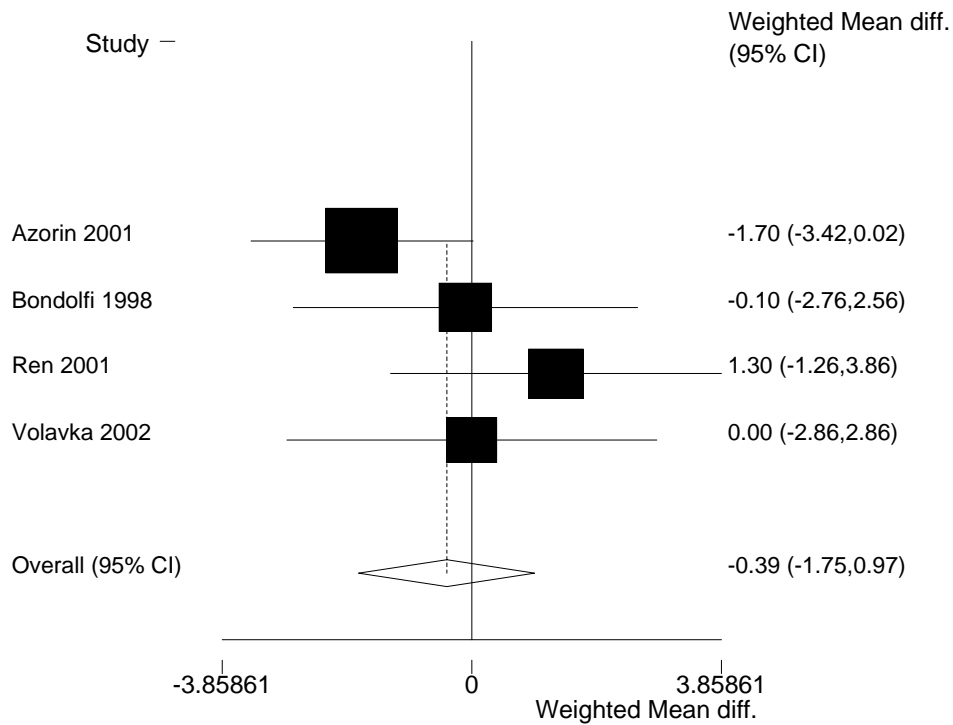

N=541

Heterogeneity chi-squared = 3.98 (d.f. = 3) p = 0.263

Estimate of between-study variance Tau-squared = 0.4872

Test of WMD=0 : z= 0.56 p = 0.575

**Figure III. 3. d: PANSS negative subscore - Clozapine versus Ziprasidone**

| Study          | WMD | [95% Conf. Interval] |
|----------------|-----|----------------------|
| Sacchetti 2006 | 1.5 | -.618468 3.61847     |
| I-V pooled WMD | 1.5 | -.618468 3.61847     |

N=144

Test of WMD=0 : z= 1.39 p = 0.165

**Figure III. 4. a: PANSS negative subscore - Olanzapine versus Amisulpride**

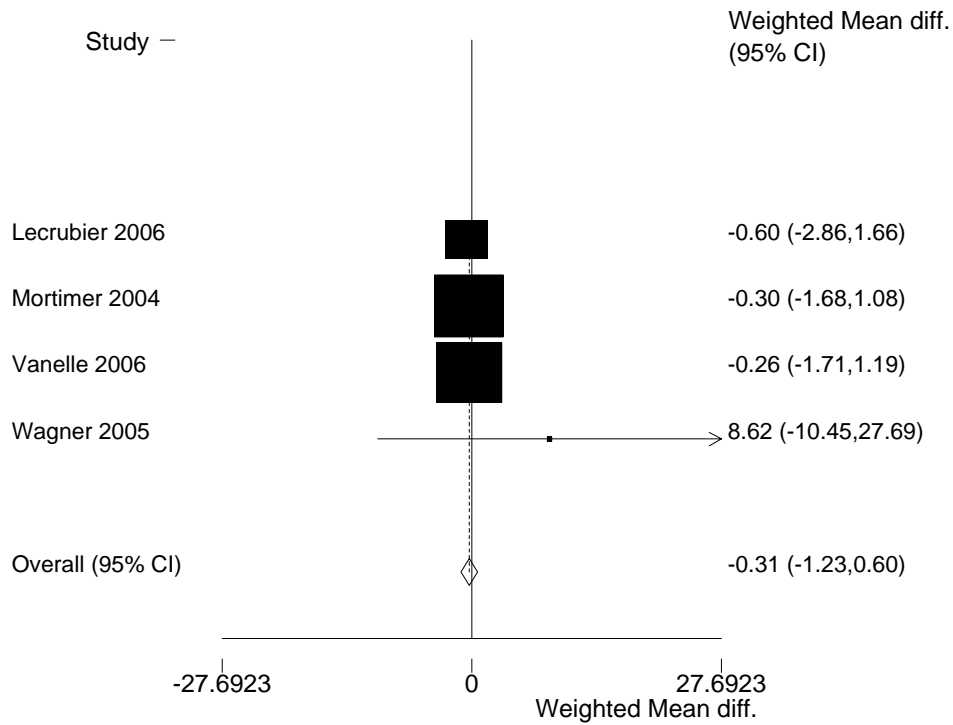

N=698

Heterogeneity chi-squared = 0.91 (d.f. = 3) p = 0.823

Estimate of between-study variance Tau-squared = 0.0000

Test of WMD=0 : z = 0.67 p = 0.502

**Figure III. 4. b: PANSS negative subscore - Olanzapine versus Clozapine**

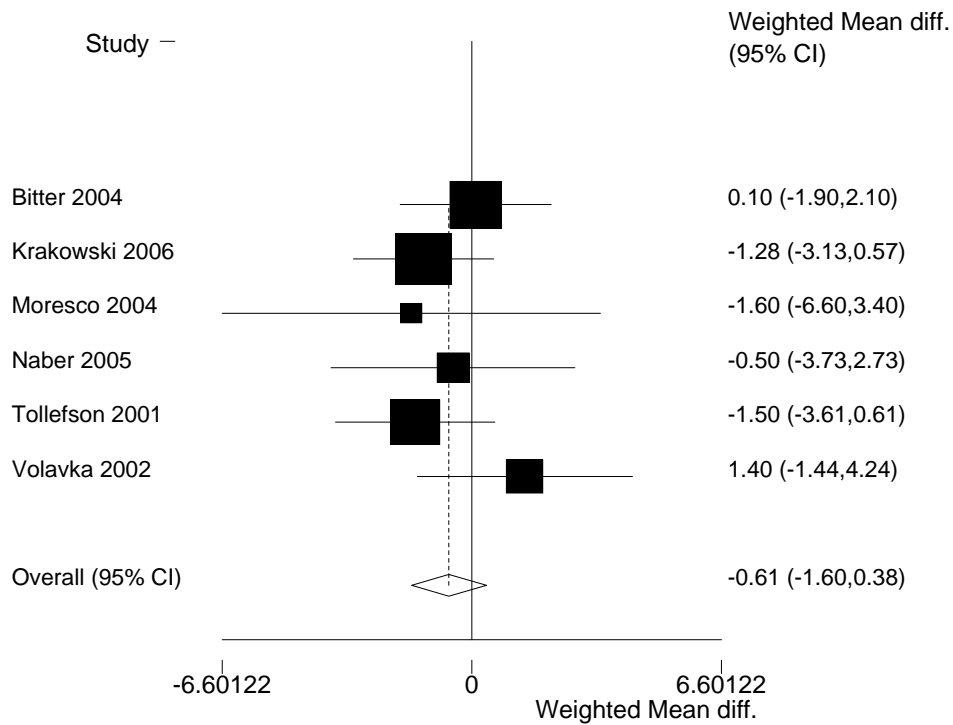

N=593

Heterogeneity chi-squared = 3.74 (d.f. = 5) p = 0.587

Estimate of between-study variance Tau-squared = 0.0000

Test of WMD=0 : z = 1.21 p = 0.227

**Figure III. 4. c: PANSS negative subscore - Olanzapine versus Quetiapine**

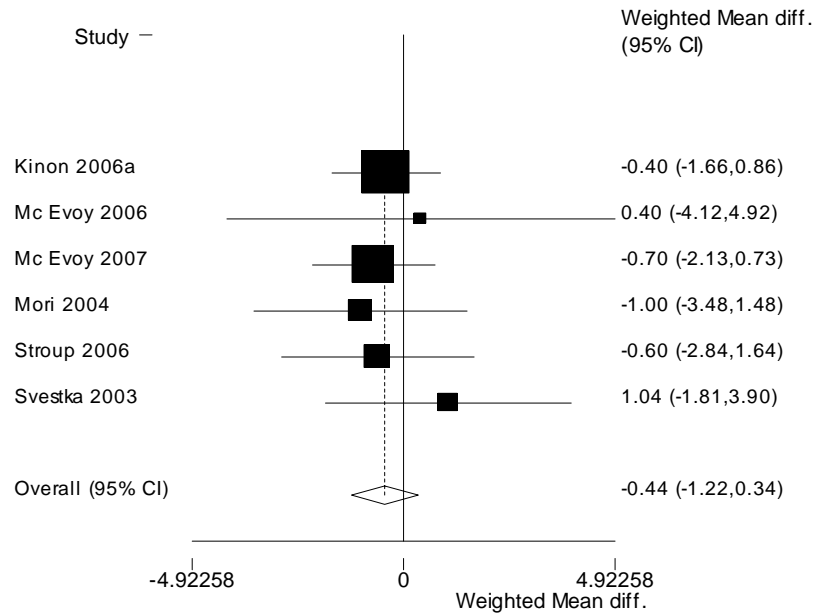

N=646

Heterogeneity chi-squared = 1.51 (d.f. = 5) p = 0.912

Estimate of between-study variance Tau-squared = 0.0000

Test of WMD=0 : z= 1.11 p = 0.266

**Figure III. 4. d: PANSS negative subscore - Olanzapine versus Risperidone**

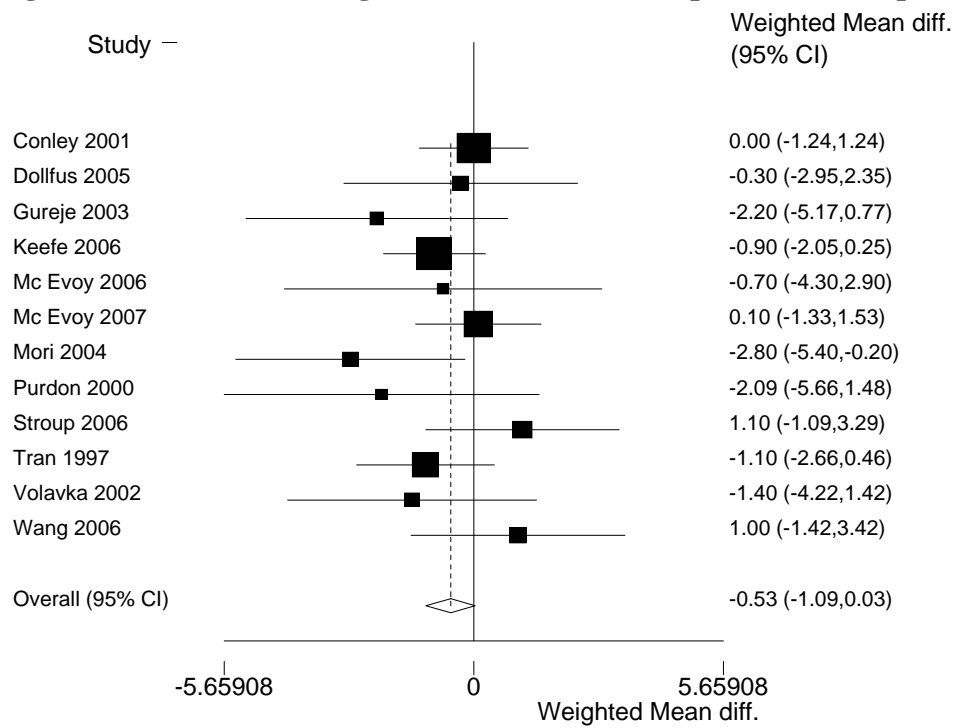

N=1545

Heterogeneity chi-squared = 11.31 (d.f. = 11) p = 0.417

Estimate of between-study variance Tau-squared = 0.0281

Test of WMD=0 : z = 1.87 p = 0.062

**Figure III. 4. e: PANSS negative subscore - Olanzapine versus Ziprasidone**

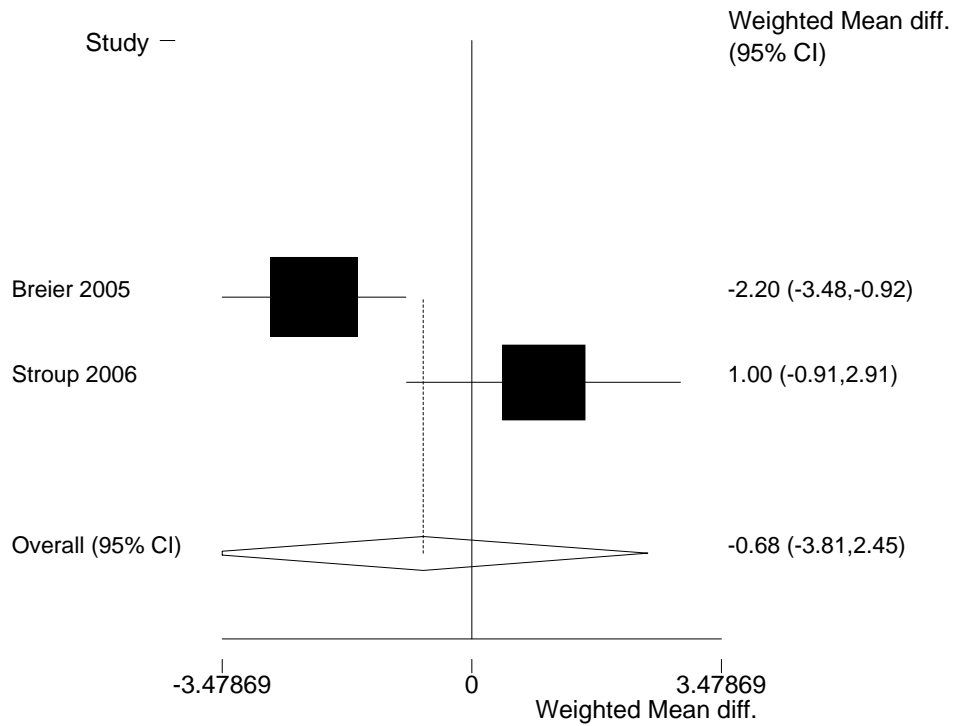

N=730

Heterogeneity chi-squared = 7.45 (d.f. = 1) p = 0.006

Estimate of between-study variance Tau-squared = 4.4329

Test of WMD=0 : z= 0.43 p = 0.670

**Figure III. 5. a: PANSS negative subscore - Quetiapine versus Clozapine**

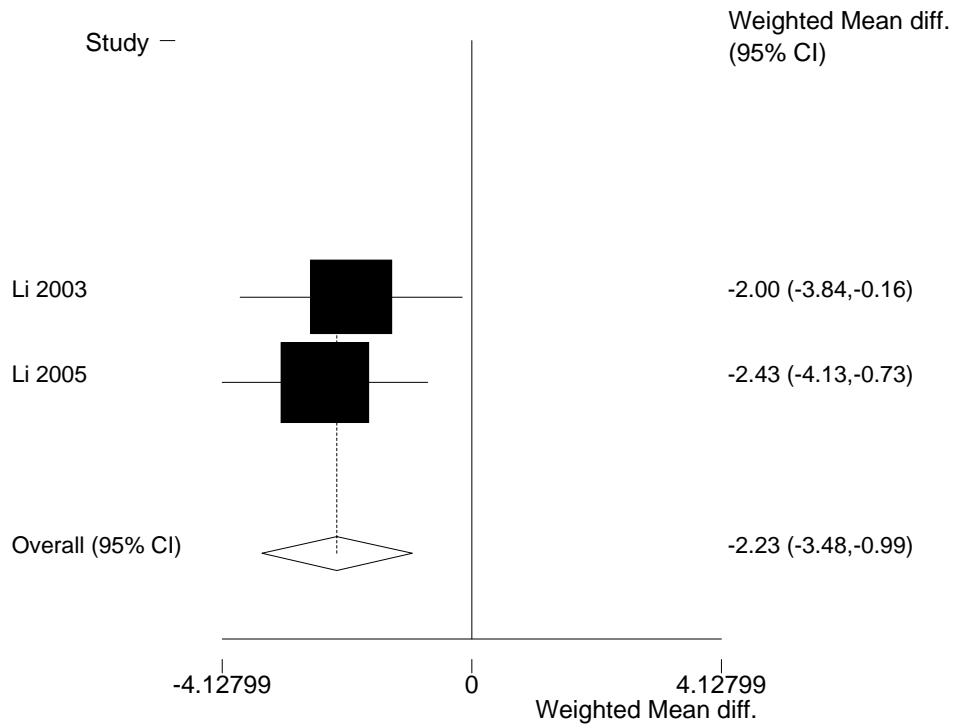

N=142

Heterogeneity chi-squared = 0.11 (d.f. = 1) p = 0.736

Estimate of between-study variance Tau-squared = 0.0000

Test of WMD=0 : z = 3.51 p = 0.000



**Figure III. 5. b: PANSS negative subscore - Quetiapine versus Olanzapine**

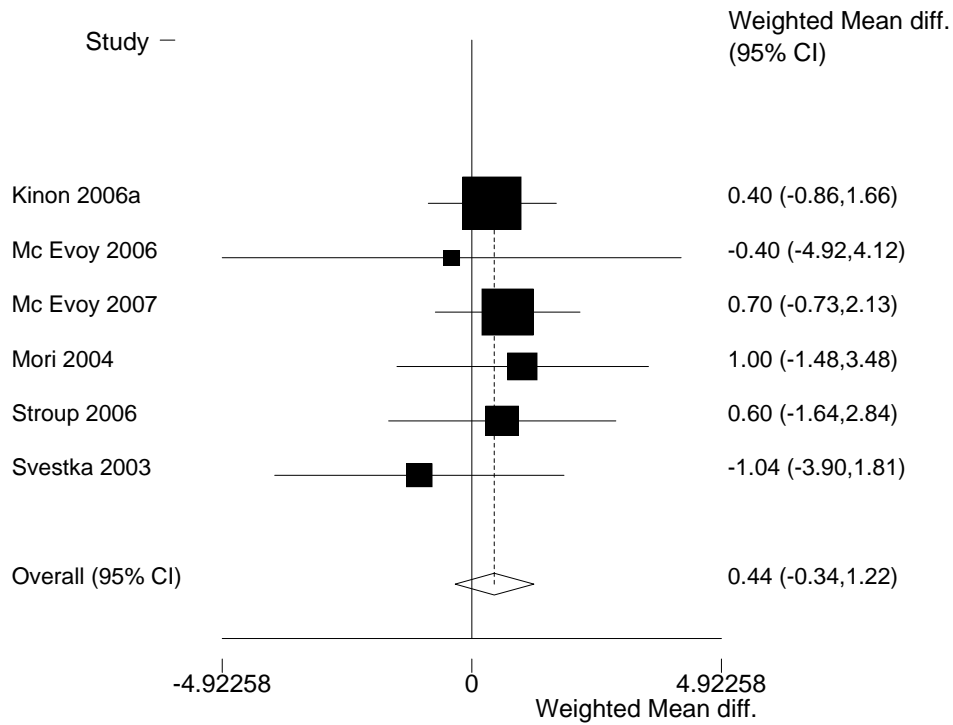

N=646

Heterogeneity chi-squared = 1.51 (d.f. = 5) p = 0.912

Estimate of between-study variance Tau-squared = 0.0000

Test of WMD=0 : z= 1.11 p = 0.266

**Figure III. 5. c: PANSS negative subscore - Quetiapine versus Risperidone**

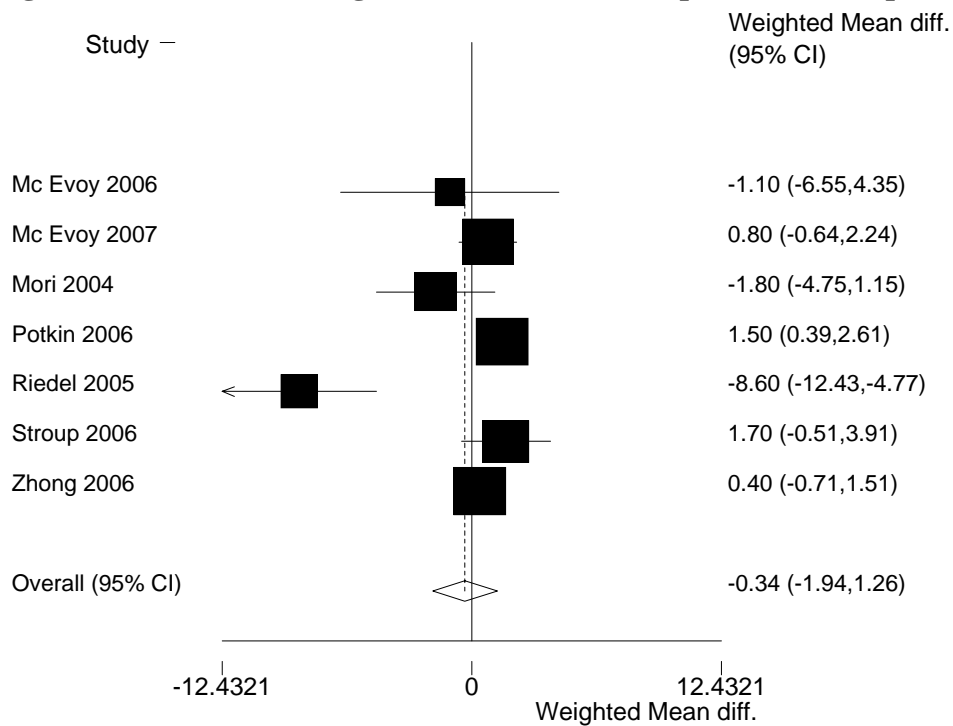

N=1264

Heterogeneity chi-squared = 28.72 (d.f. = 6) p = 0.000

Estimate of between-study variance Tau-squared = 3.1291

Test of WMD=0 : z = 0.42 p = 0.673

**Figure III. 5. d: PANSS negative subscore - Quetiapine versus Ziprasidone**

| Study          | WMD | [95% Conf. Interval] |
|----------------|-----|----------------------|
| Stroup 2006    | 1.6 | -.339218 3.53922     |
| I-V pooled WMD | 1.6 | -.339218 3.53922     |

N=198

Test of WMD=0 : z = 1.62 p = 0.106

**Figure III. 6. a: PANSS negative subscore - Risperidone versus Amisulpride**

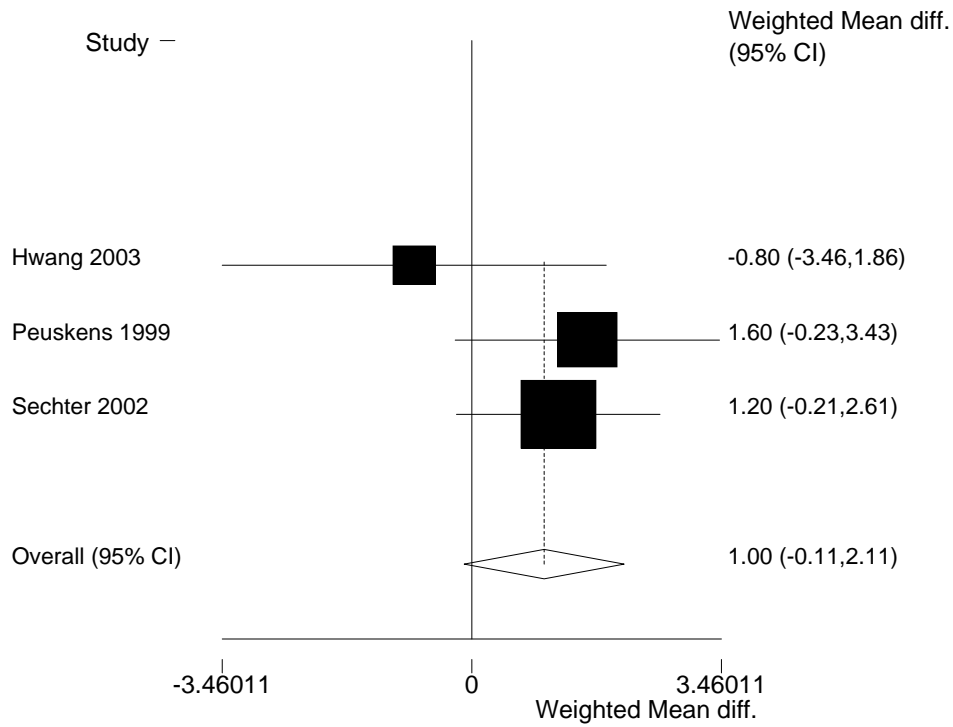

N=519

Heterogeneity chi-squared = 2.25 (d.f. = 2) p = 0.325

Estimate of between-study variance Tau-squared = 0.1144

Test of WMD=0 : z = 1.76 p = 0.078

**Figure III. 6. b: PANSS negative subscore - Risperidone versus Aripiprazole**

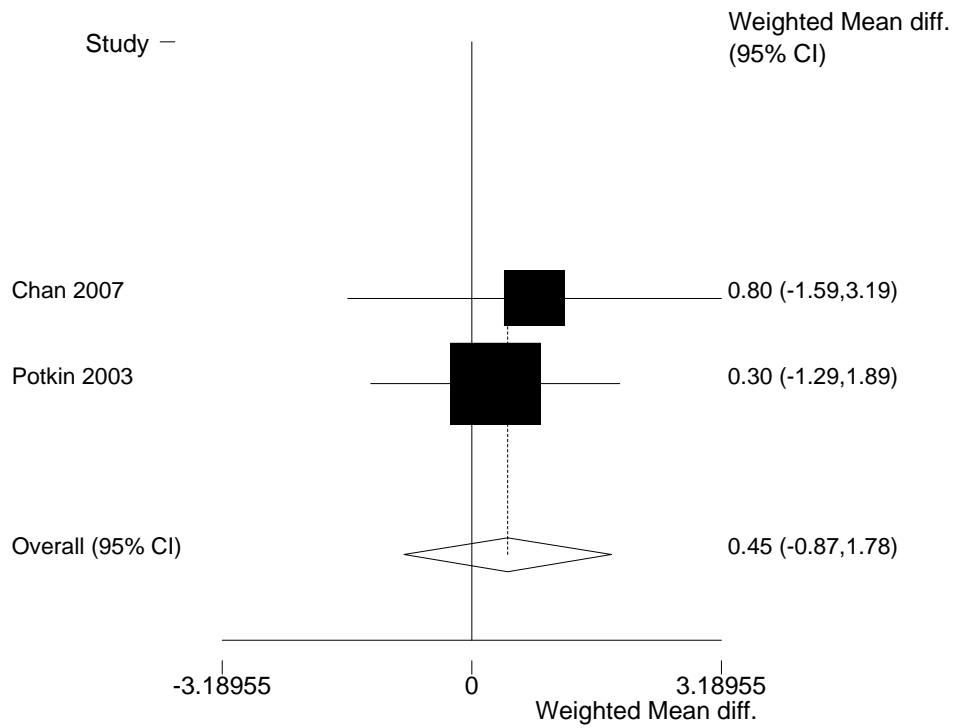

N=372

Heterogeneity chi-squared = 0.12 (d.f. = 1) p = 0.733

Estimate of between-study variance Tau-squared = 0.0000

Test of WMD=0 : z= 0.67 p = 0.502

**Figure III. 6. c: PANSS negative subscore - Risperidone versus Clozapine**

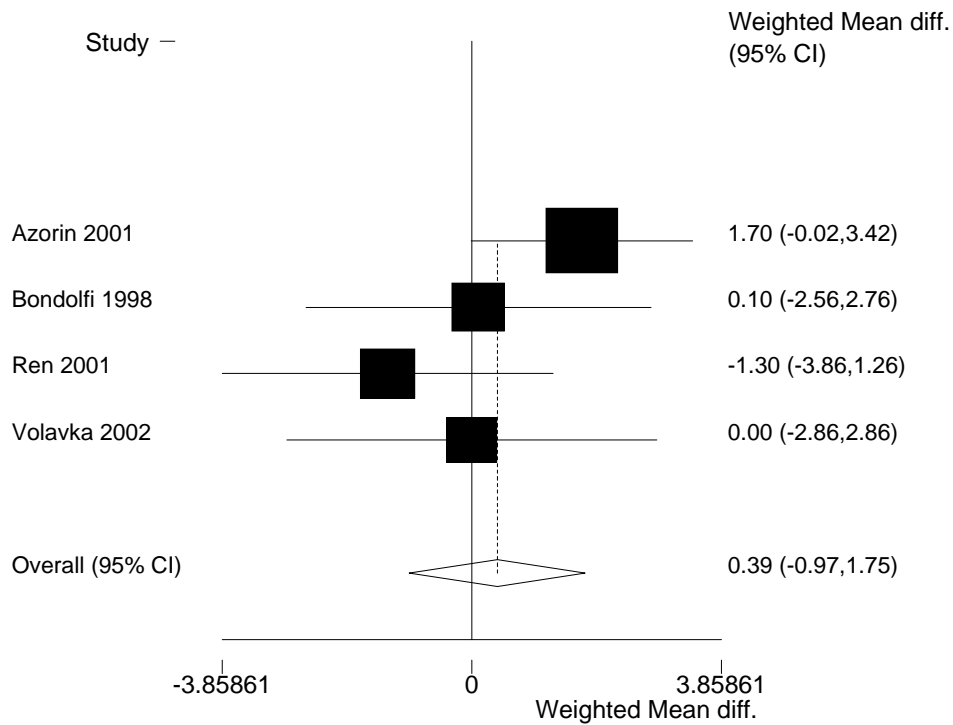

N=541

Heterogeneity chi-squared = 3.98 (d.f. = 3) p = 0.263

Estimate of between-study variance Tau-squared = 0.4872

Test of WMD=0 : z = 0.56 p = 0.575

**Figure III. 6. d: PANSS negative subscore - Risperidone versus Olanzapine**

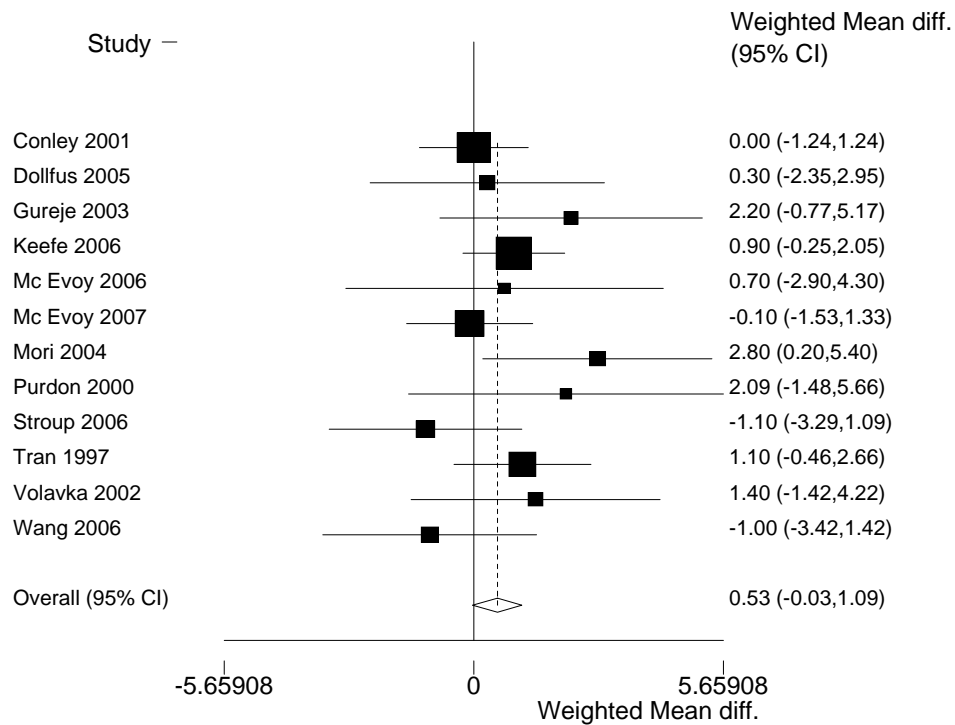

N=1545

Heterogeneity chi-squared = 11.31 (d.f. = 11) p = 0.417

Estimate of between-study variance Tau-squared = 0.0281

Test of WMD=0 : z= 1.87 p = 0.062

**Figure III. 6. e: PANSS negative subscore - Risperidone versus Quetiapine**

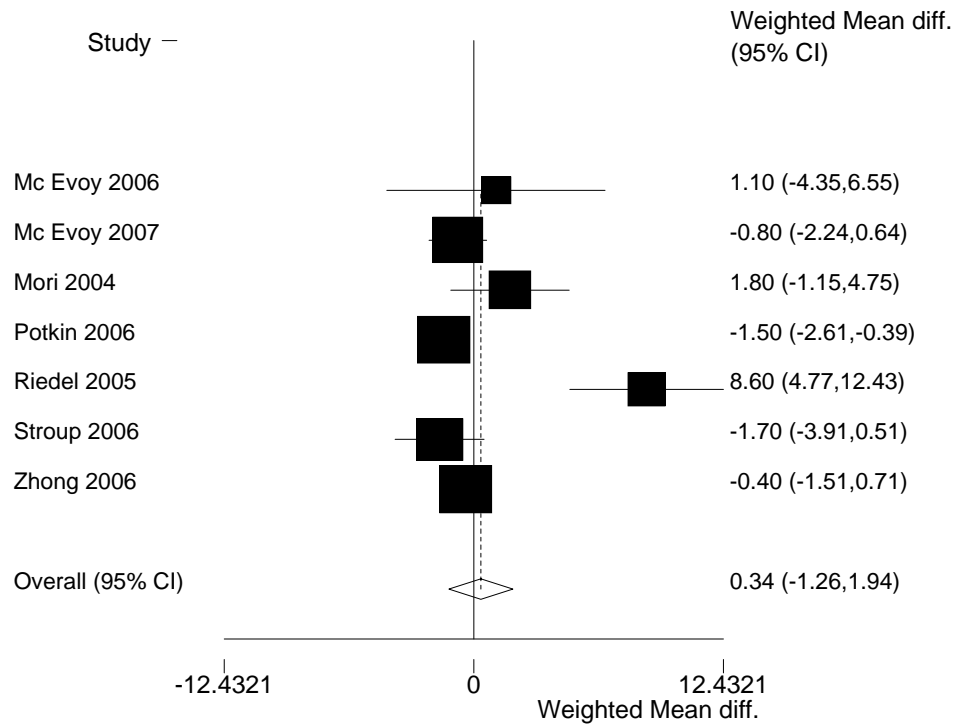

N=1264  
Heterogeneity chi-squared = 28.72 (d.f. = 6) p = 0.000  
Estimate of between-study variance Tau-squared = 3.1291  
Test of WMD=0 : z= 0.42 p = 0.673

**Figure III. 6. f: PANSS negative subscore - Risperidone versus Sertindole**

| Study          | WMD | [95% Conf. Interval] |
|----------------|-----|----------------------|
| Azorin 2006    | 1.3 | -.531586 3.13159     |
| I-V pooled WMD | 1.3 | -.531586 3.13159     |

N=172  
Test of WMD=0 : z= 1.39 p = 0.164

**Figure III. f. g: PANSS negative subscore - Risperidone versus Ziprasidone**

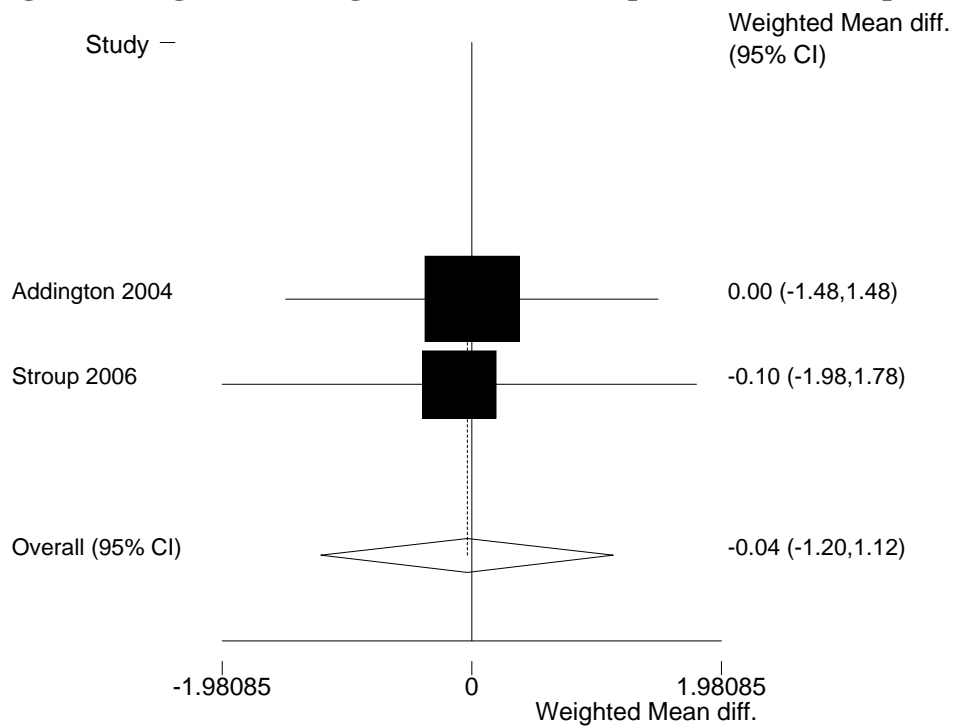

N=500

Heterogeneity chi-squared = 0.01 (d.f. = 1) p = 0.935

Estimate of between-study variance Tau-squared = 0.0000

Test of WMD=0 : z= 0.06 p = 0.949

**Figure III. 7. a: PANSS negative subscore - Sertindole versus Risperidone**

| Study          | WMD  | [95% Conf. Interval] |
|----------------|------|----------------------|
| Azorin 2006    | -1.3 | -3.13159 .531586     |
| I-V pooled WMD | -1.3 | -3.13159 .531586     |

N=172

Test of WMD=0 : z= 1.39 p = 0.164



**Figure III. 8. a: PANSS negative subscore - Ziprasidone versus Amisulpride**

| Study          | WMD | [95% Conf. Interval] |
|----------------|-----|----------------------|
| Olie 2006      | .8  | -1.41218 3.01218     |
| I-V pooled WMD | .8  | -1.41218 3.01218     |

N=122

Test of WMD=0 : z= 0.71 p = 0.478

**Figure III. 8. b: PANSS negative subscore - Ziprasidone versus Olanzapine**

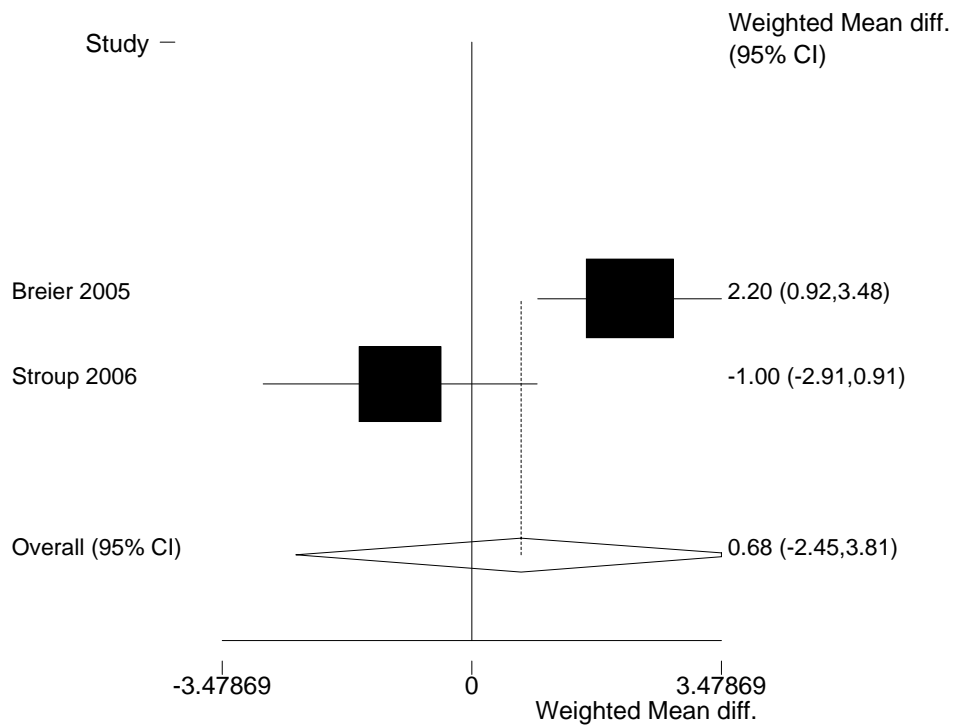

N=730

Heterogeneity chi-squared = 7.45 (d.f. = 1) p = 0.006

Estimate of between-study variance Tau-squared = 4.4329

Test of WMD=0 : z= 0.43 p = 0.670

**Figure III. 8. c: PANSS negative subscore - Ziprasidone versus Quetiapine**

| Study          | WMD  | [95% Conf. Interval] |
|----------------|------|----------------------|
| Stroup 2006    | -1.6 | -3.53922 .339218     |
| I-V pooled WMD | -1.6 | -3.53922 .339218     |

N=198

Test of WMD=0 : z= 1.62 p = 0.106

**Figure III. 8. d: PANSS negative subscore - Ziprasidone versus Risperidone**

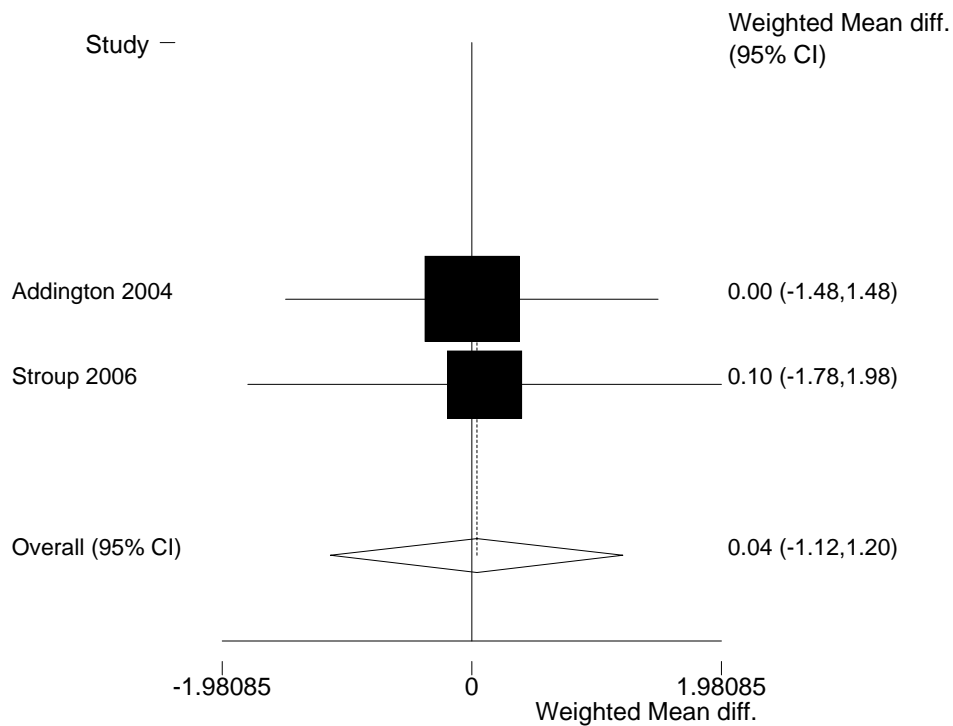

N=500

Heterogeneity chi-squared = 0.01 (d.f. = 1) p = 0.935

Estimate of between-study variance Tau-squared = 0.0000

Test of WMD=0 : z= 0.06 p = 0.949

**Figures IV. 1. a – IV. 9. a. : Dropout due to inefficacy (risk ratio)**

**Figure IV. 1. a: Dropout due to inefficacy - Amisulpride versus Olanzapine**

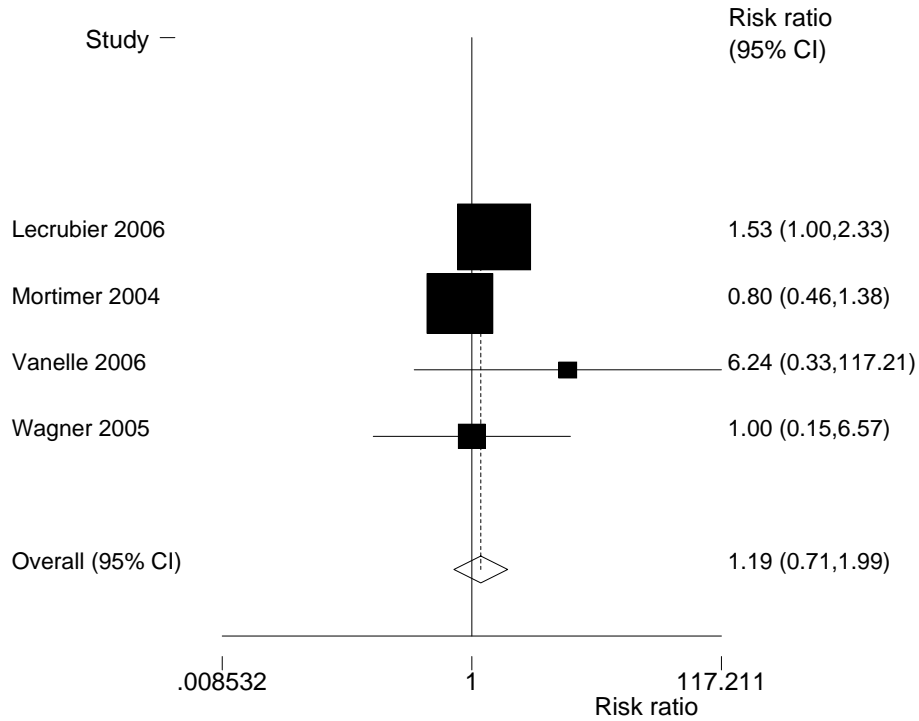

N=724

Heterogeneity chi-squared = 4.65 (d.f. = 3) p = 0.199

Estimate of between-study variance Tau-squared = 0.0909

Test of RR=1 : z = 0.66 p = 0.506

**Figure IV. 1. b: Dropout due to inefficacy - Amisulpride versus Risperidone**

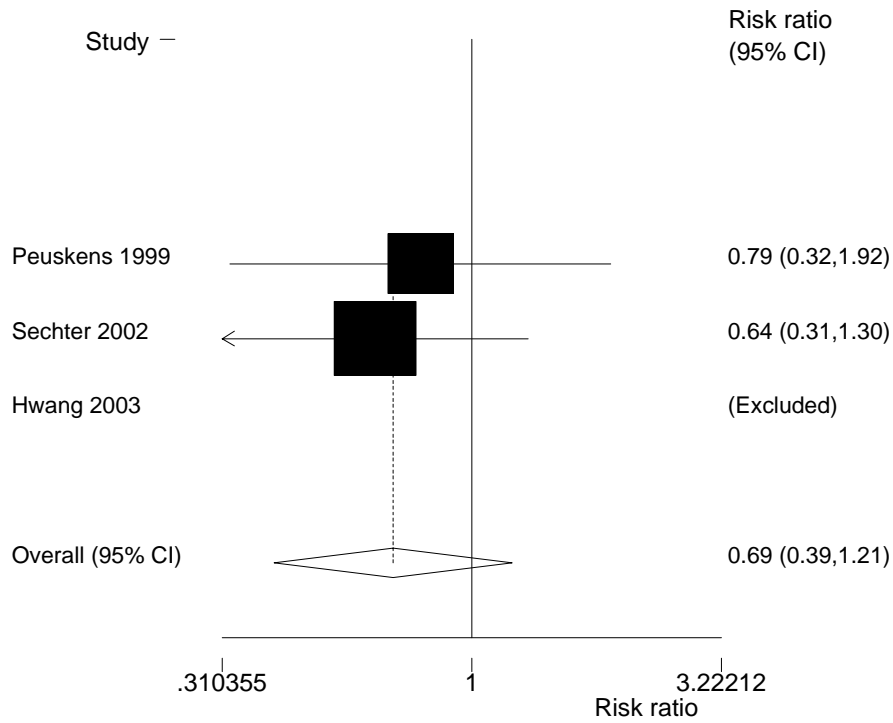

N=538

Heterogeneity chi-squared = 0.13 (d.f. = 1) p = 0.715

Estimate of between-study variance Tau-squared = 0.0000

Test of RR=1 : z= 1.30 p = 0.194

**Figure IV. 1. c: Dropout due to inefficacy – Amisulpride versus Ziprasidone**

| Study         | RR   | [95% Conf. Interval] | % Weight |
|---------------|------|----------------------|----------|
| Olie 2006     | 0.21 | .05 0.94             | 100      |
| M-H pooled RR | 0.21 | .05 0.94             | 100      |

N=123

Test of RR=1 : z= 2.04 p = 0.04

**Figure IV. 2. a: Dropout due to inefficacy - Aripiprazole versus Olanzapine**

| Study         | RR      | [95% Conf. Interval] | % Weight |
|---------------|---------|----------------------|----------|
| McQuade 2004  | 1.69551 | .905877 3.17346      | 100      |
| M-H pooled RR | 1.69551 | .905877 3.17346      |          |

N=317

Test of RR=1 : z= 1.65 p = 0.099

**Figure IV. 2. b: Dropout due to inefficacy - Aripiprazole versus Risperidone**

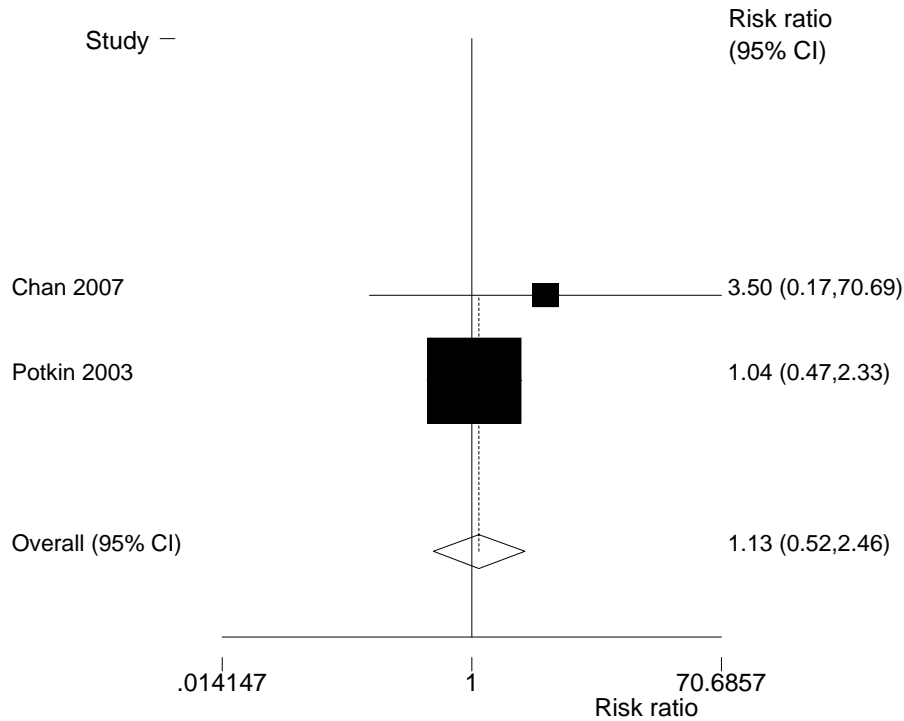

N=384

Heterogeneity chi-squared = 0.59 (d.f. = 1) p = 0.442

Estimate of between-study variance Tau-squared = 0.0000

Test of RR=1 : z= 0.31 p = 0.759

**Figure IV. 3. a: Dropout due to inefficacy - Clozapine versus Olanzapine**

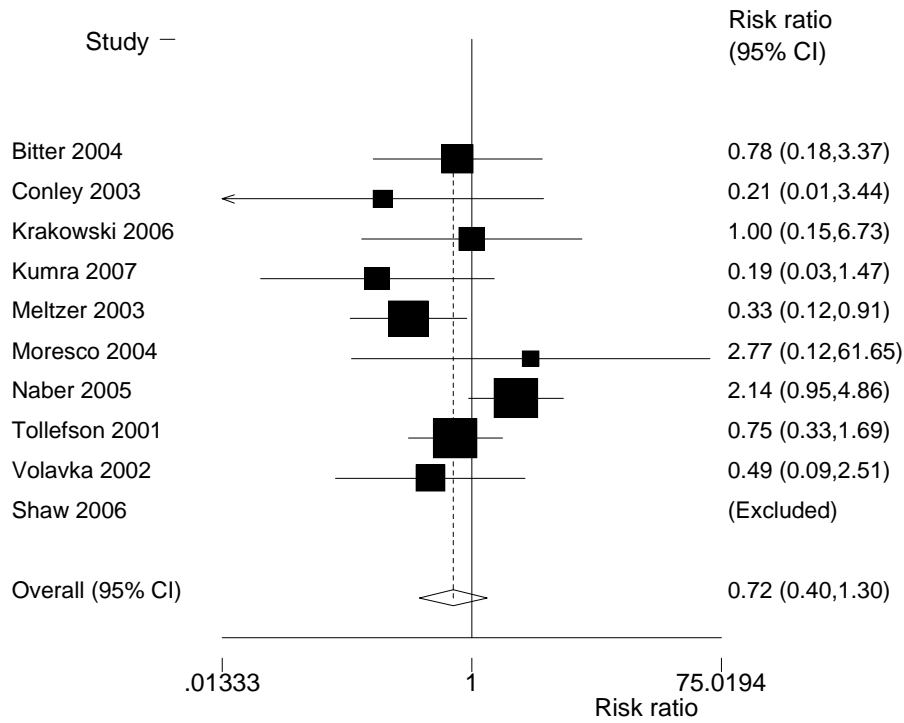

N=1649

Heterogeneity chi-squared = 12.39 (d.f. = 8) p = 0.135

Estimate of between-study variance Tau-squared = 0.2532

Test of RR=1 : z= 1.08 p = 0.279

**Figure IV. 3. b: Dropout due to inefficacy - Clozapine versus Risperidone**

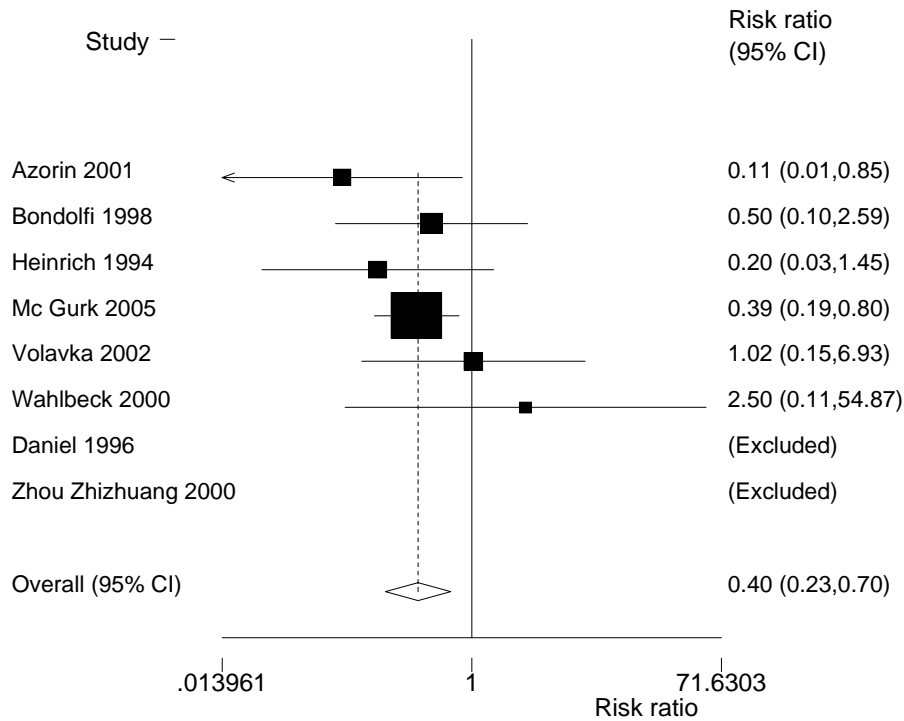

N=627

Heterogeneity chi-squared = 4.46 (d.f. = 5) p = 0.485

Estimate of between-study variance Tau-squared = 0.0000

Test of RR=1 : z = 3.21 p = 0.001

**Figure IV. 3. c: Dropout due to inefficacy - Clozapine versus Ziprasidone**

| Study          | RR      | [95% Conf. Interval] | % Weight |
|----------------|---------|----------------------|----------|
| Sacchetti 2006 | .657658 | .113176 3.8216       | 100      |
| M-H pooled RR  | .657658 | .113176 3.8216       |          |

N=147

Heterogeneity chi-squared = 0.00 (d.f. = 0) p = .

Test of RR=1 : z = 0.47 p = 0.641



**Figure IV. 4. a: Dropout due to inefficacy - Olanzapine versus Amisulpride**

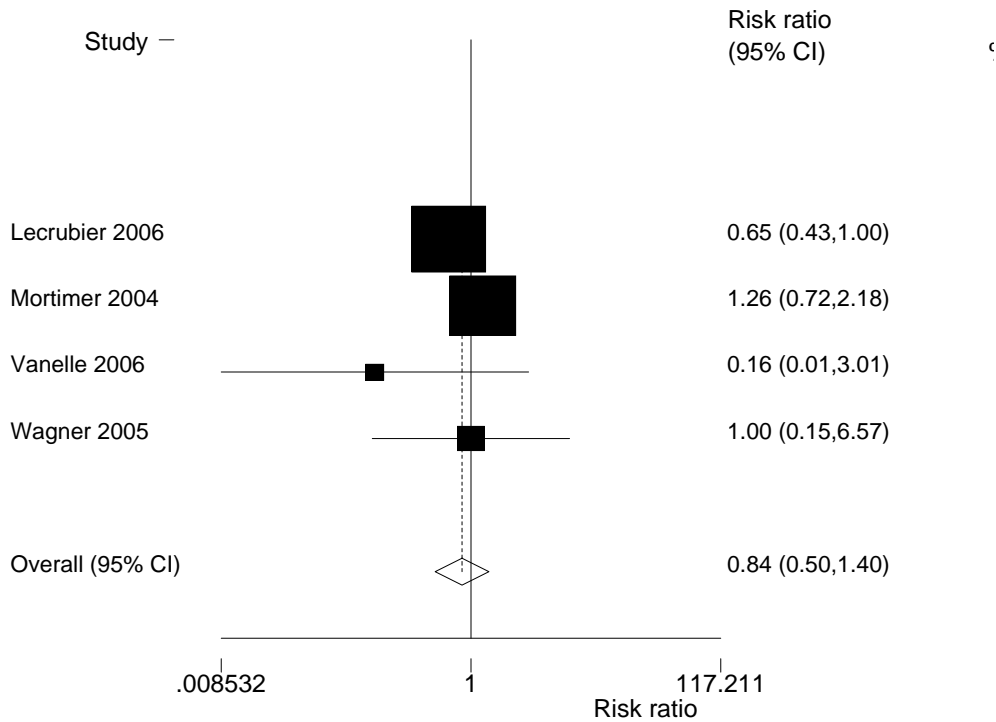

N=724

Heterogeneity chi-squared = 4.65 (d.f. = 3) p = 0.199

Estimate of between-study variance Tau-squared = 0.0909

Test of RR=1 : z= 0.66 p = 0.506

**Figure IV. 4. b: Dropout due to inefficacy - Olanzapine versus Aripiprazole**

| Study         | RR      | [95% Conf. Interval] | % Weight |
|---------------|---------|----------------------|----------|
| McQuade 2004  | .589792 | .315113 1.1039       | 100      |
| M-H pooled RR | .589792 | .315113 1.1039       |          |

N=317

Test of RR=1 : z= 1.65 p = 0.099

**Figure IV. 4. c: Dropout due to inefficacy - Olanzapine versus Clozapine**

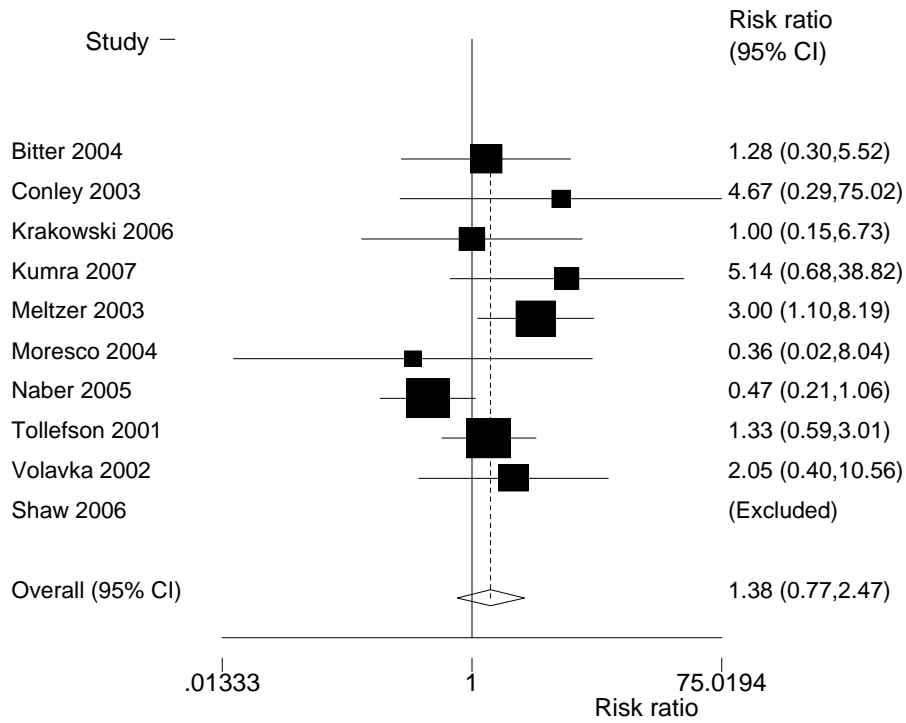

N=1649

Heterogeneity chi-squared = 12.39 (d.f. = 8) p = 0.135

Estimate of between-study variance Tau-squared = 0.2532

Test of RR=1 : z= 1.08 p = 0.279

**Figure IV. 4. d: Dropout due to inefficacy - Olanzapine versus Quetiapine**

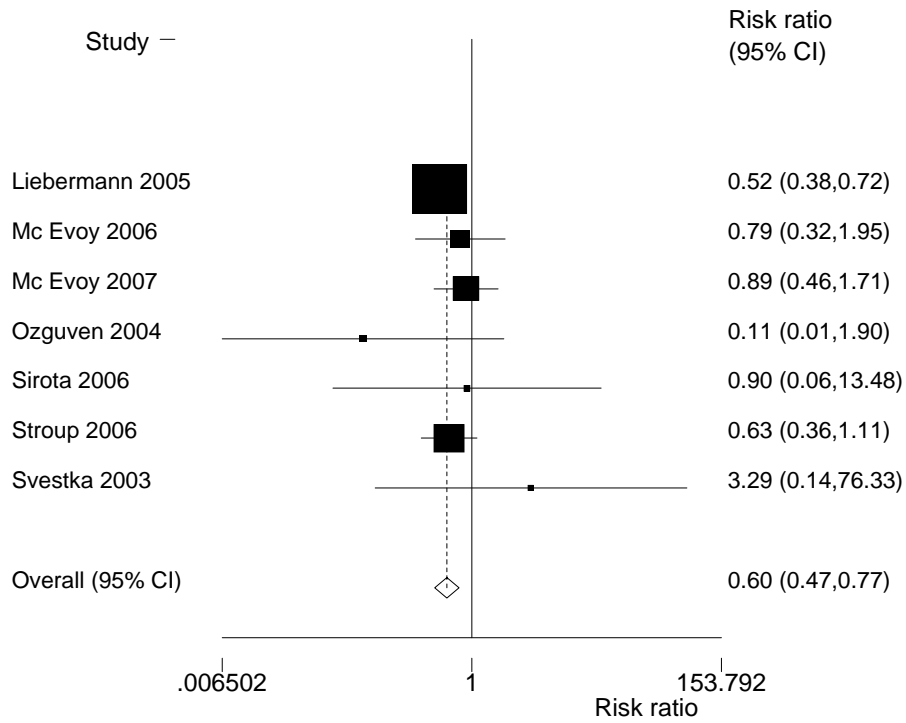

N=1217

Heterogeneity chi-squared = 5.09 (d.f. = 6) p = 0.533

Estimate of between-study variance Tau-squared = 0.0000

Test of RR=1 : z= 4.13 p = 0.000

**Figure IV. 4. e: Dropout due to inefficacy - Olanzapine versus Risperidone**

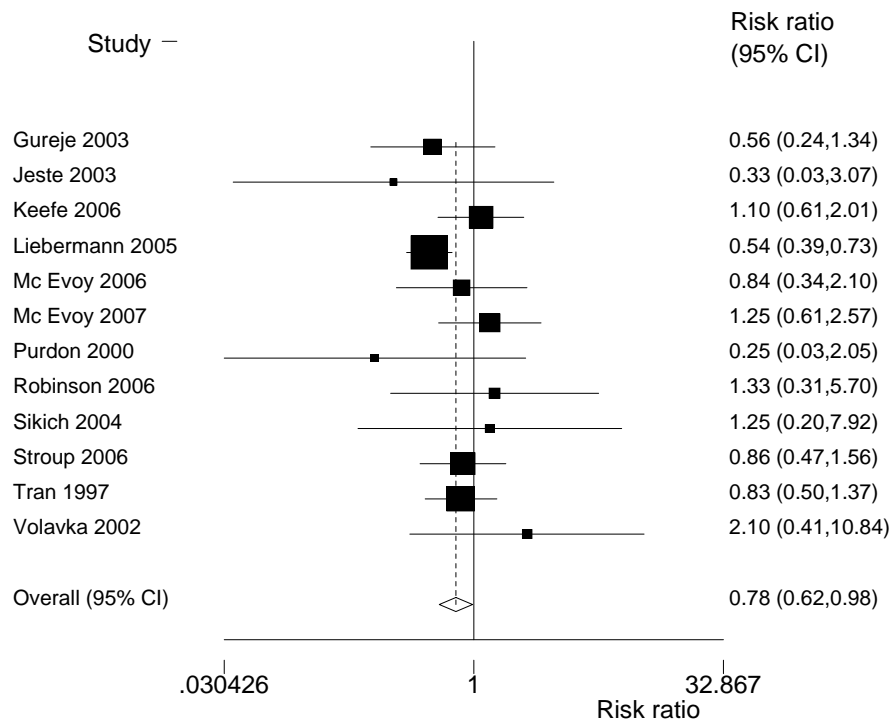

N=2291

Heterogeneity chi-squared = 12.74 (d.f. = 11) p = 0.311

Estimate of between-study variance Tau-squared = 0.0225

Test of RR=1 : z= 2.10 p = 0.035

**Figure IV. 4. f: Dropout due to inefficacy - Olanzapine versus Ziprasidone**

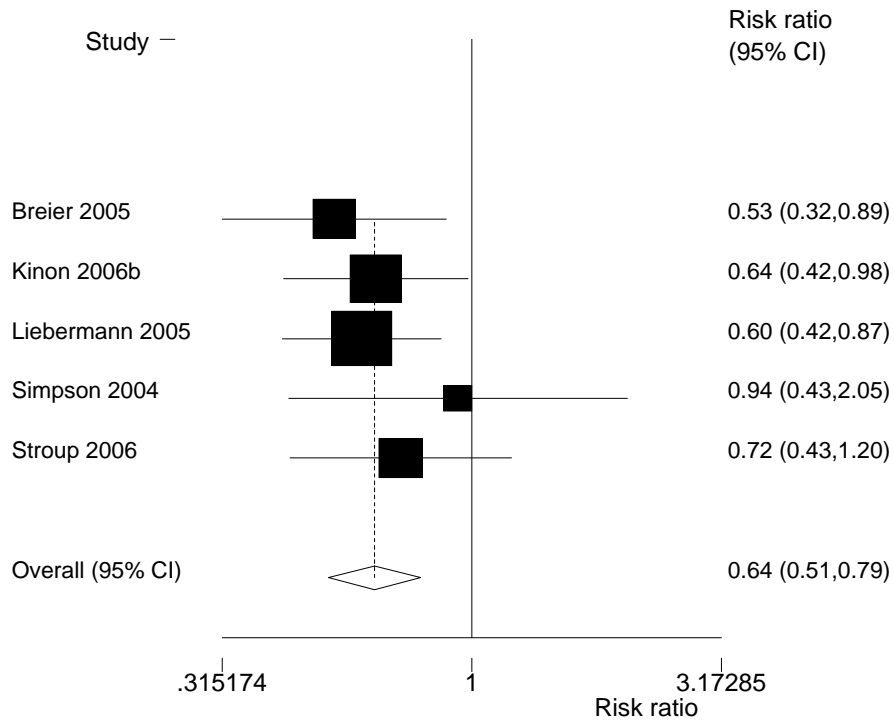

N=1937

Heterogeneity chi-squared = 1.75 (d.f. = 4) p = 0.782

Estimate of between-study variance Tau-squared = 0.0000

Test of RR=1 : z= 4.15 p = 0.000

**Figure IV. 5. a: Dropout due to inefficacy - Quetiapine versus Olanzapine**

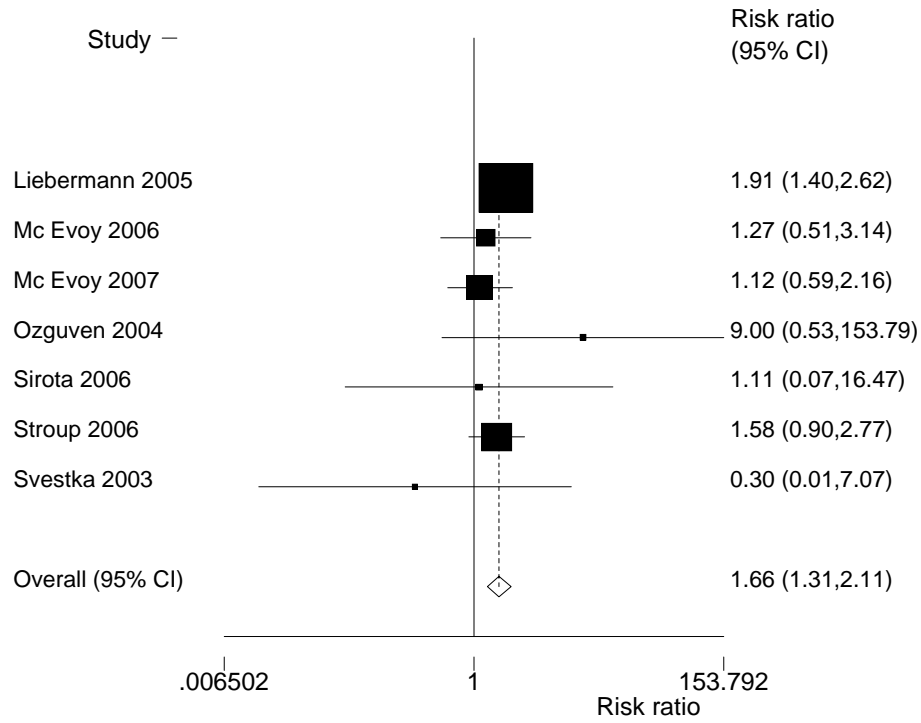

N=1217

Heterogeneity chi-squared = 5.09 (d.f. = 6) p = 0.533

Estimate of between-study variance Tau-squared = 0.0000

Test of RR=1 : z= 4.13 p = 0.000

**Figure IV. 5. b: Dropout due to inefficacy - Quetiapine versus Risperidone**

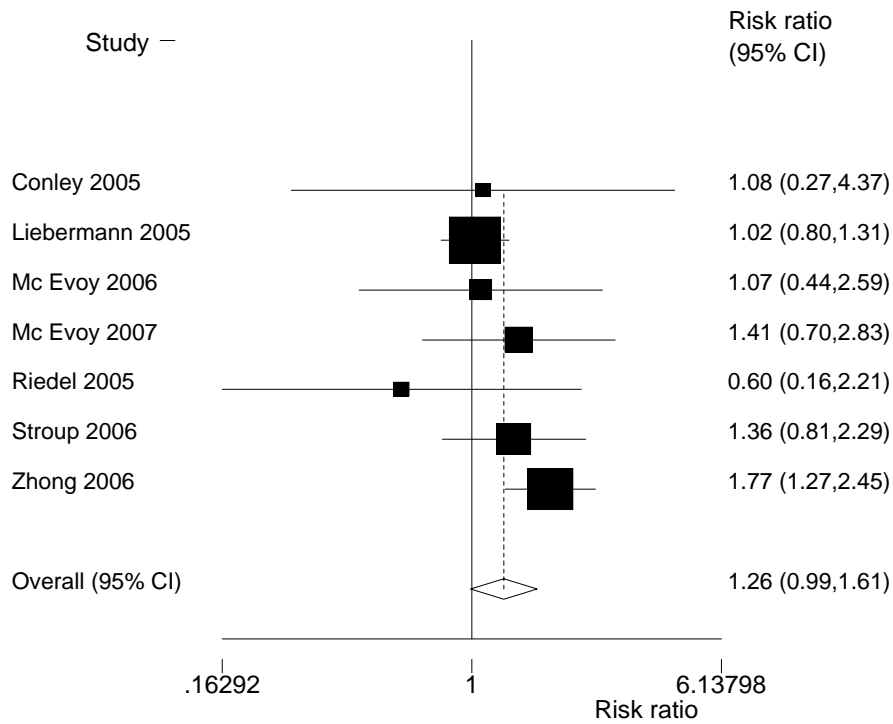

N=1851

Heterogeneity chi-squared = 8.41 (d.f. = 6) p = 0.210

Estimate of between-study variance Tau-squared = 0.0277

Test of RR=1 : z= 1.90 p = 0.058

**Figure IV. 5. c: Dropout due to inefficacy - Quetiapine versus Ziprasidone**

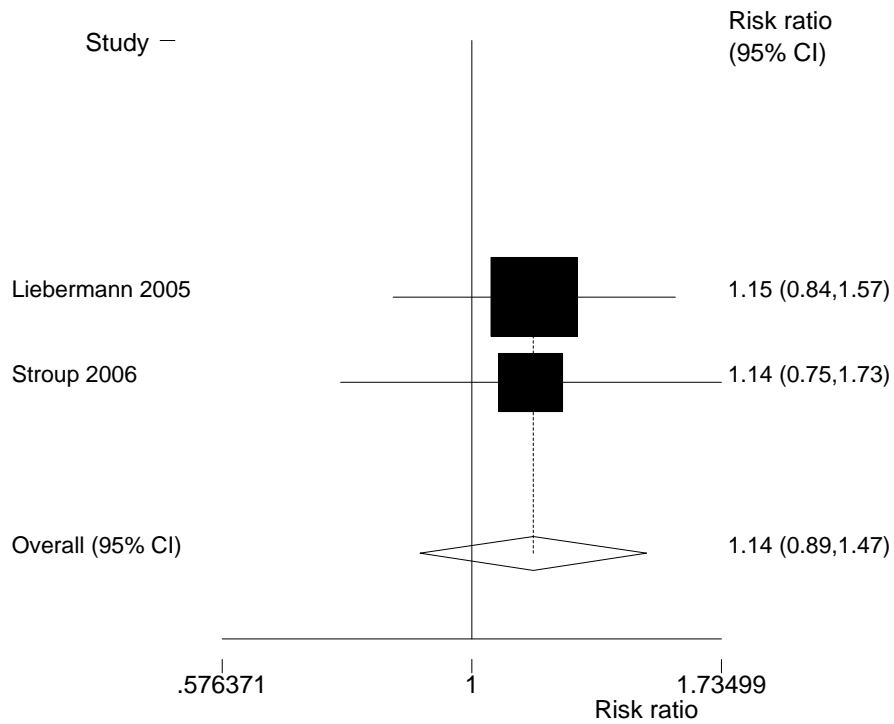

N=722

Heterogeneity chi-squared = 0.00 (d.f. = 1) p = 0.977

Estimate of between-study variance Tau-squared = 0.0000

Test of RR=1 : z= 1.06 p = 0.290



**Figure IV. 6. a: Dropout due to inefficacy - Risperidone versus Amisulpride**

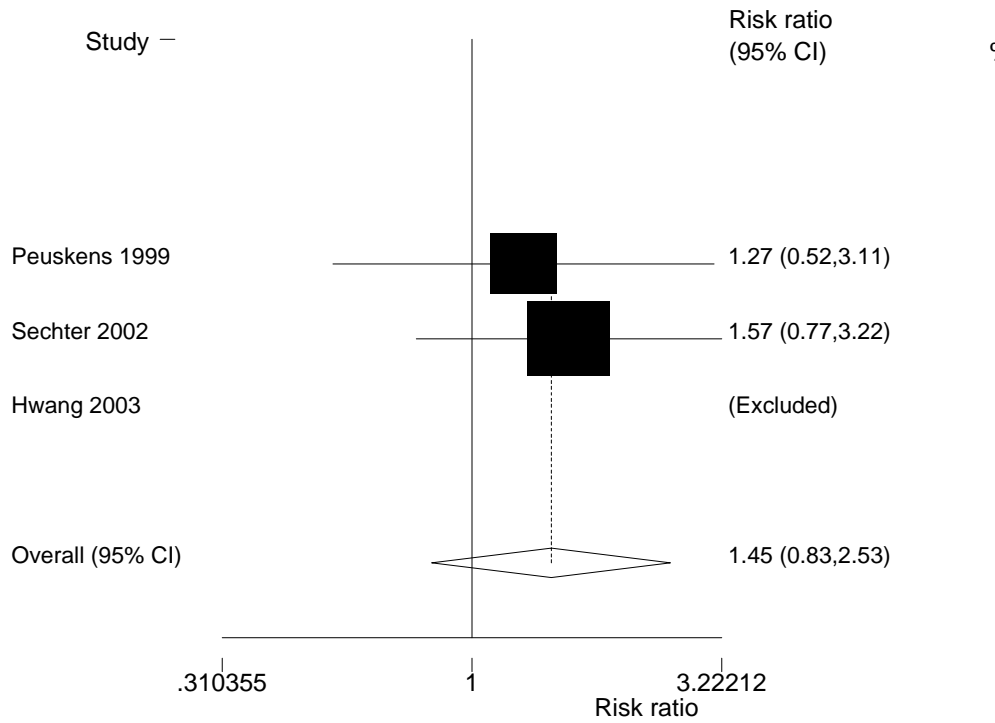

N=538

Heterogeneity chi-squared = 0.13 (d.f. = 1) p = 0.715

Estimate of between-study variance Tau-squared = 0.0000

Test of RR=1 : z= 1.30 p = 0.194

**Figure IV. 6. b: Dropout due to inefficacy - Risperidone versus Aripiprazole**

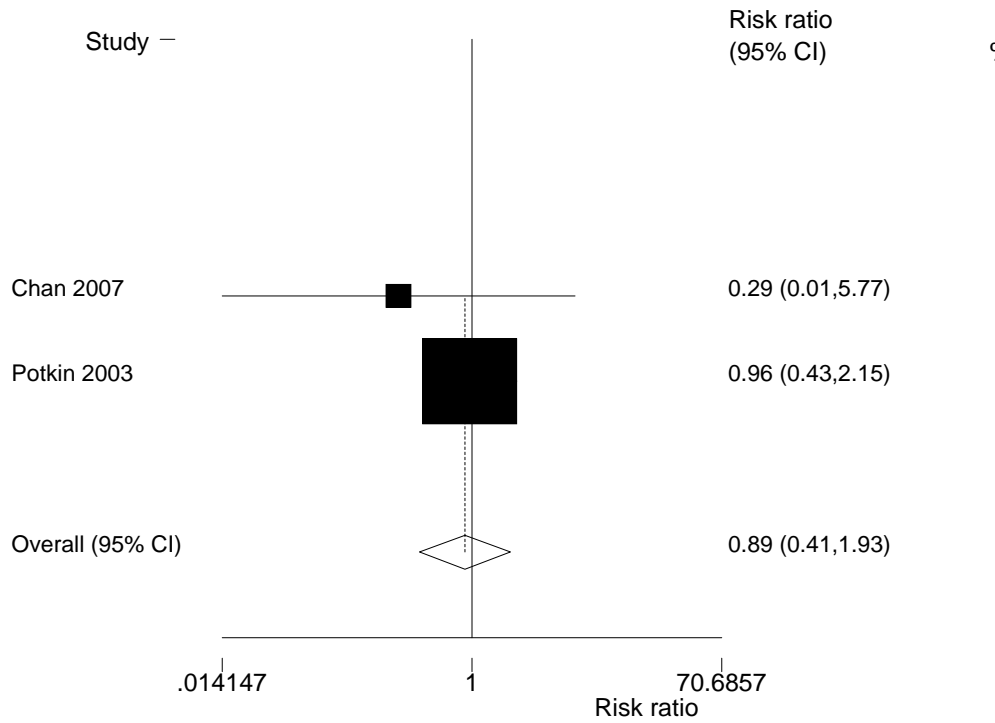

N=384

Heterogeneity chi-squared = 0.59 (d.f. = 1) p = 0.442

Estimate of between-study variance Tau-squared = 0.0000

Test of RR=1 : z= 0.31 p = 0.759

**Figure IV. 6. c: Dropout due to inefficacy - Risperidone versus Clozapine**

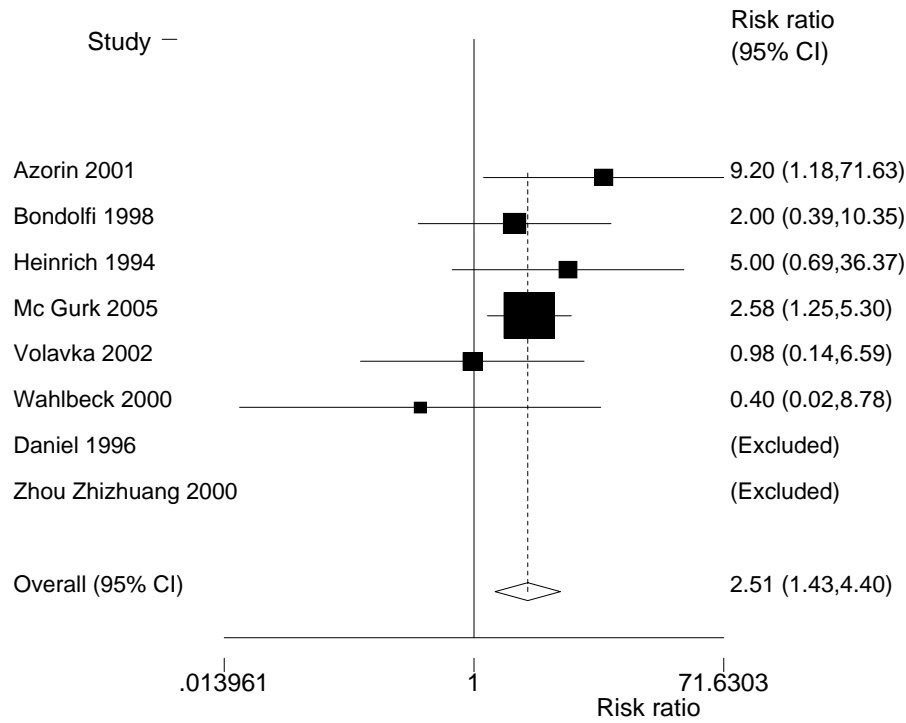

N=627

Heterogeneity chi-squared = 4.46 (d.f. = 5) p = 0.485

Estimate of between-study variance Tau-squared = 0.0000

Test of RR=1 : z= 3.21 p = 0.001

**Figure IV. 6. d: Dropout due to inefficacy - Risperidone versus Olanzapine**

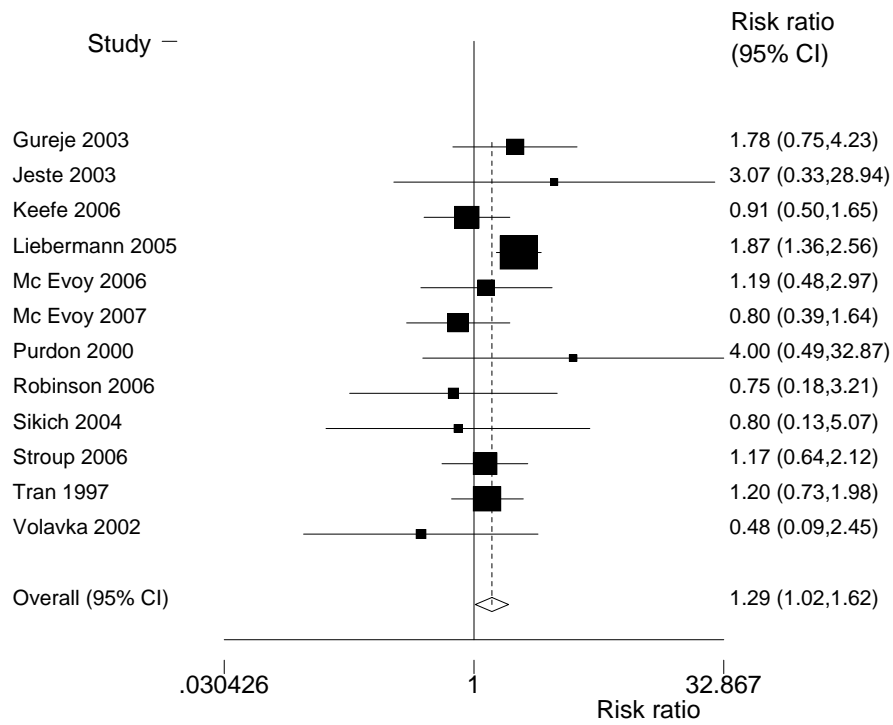

N=2291

Heterogeneity chi-squared = 12.74 (d.f. = 11) p = 0.311

Estimate of between-study variance Tau-squared = 0.0225

Test of RR=1 : z= 2.10 p = 0.035

**Figure IV. 6. e: Dropout due to inefficacy - Risperidone versus Quetiapine**

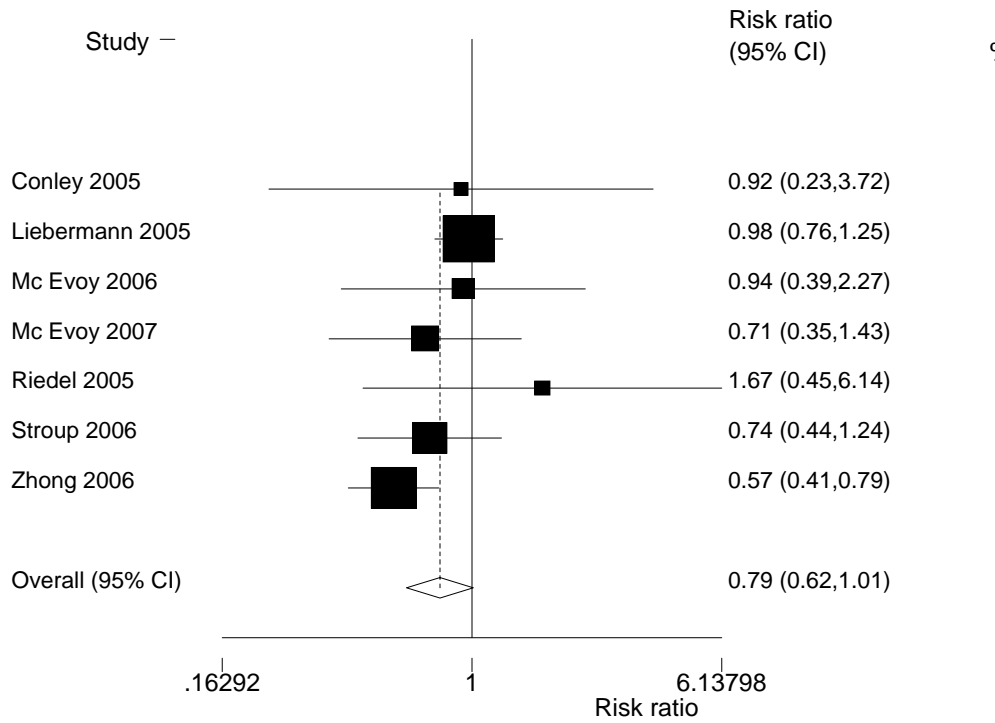

N=1851

Heterogeneity chi-squared = 8.41 (d.f. = 6) p = 0.210

Estimate of between-study variance Tau-squared = 0.0277

Test of RR=1 : z= 1.90 p = 0.058

**Figure IV. 6. f: Dropout due to inefficacy - Risperidone versus Sertindole**

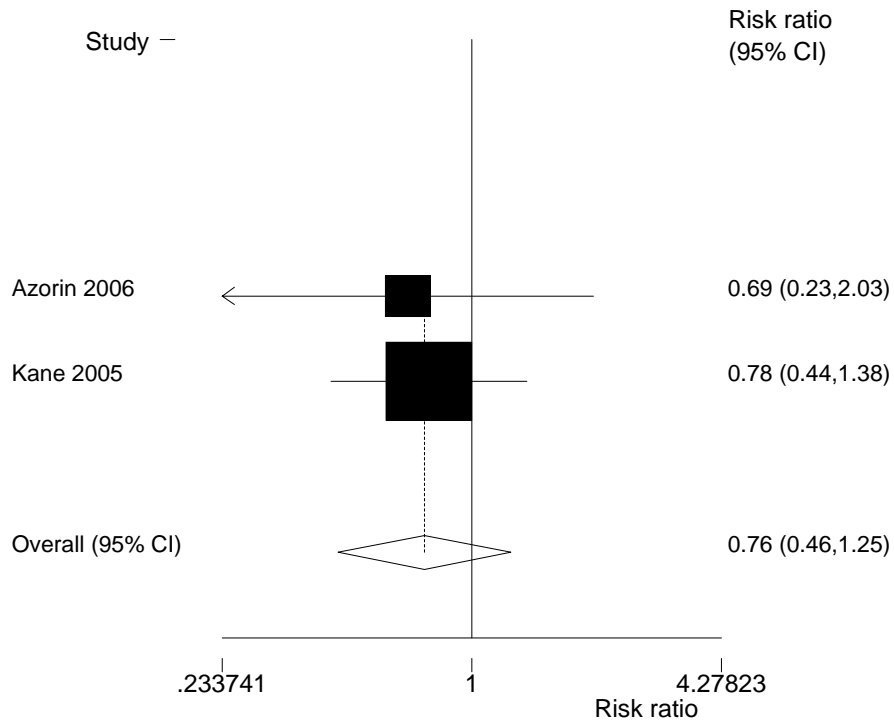

N=508

Heterogeneity chi-squared = 0.04 (d.f. = 1) p = 0.843

Estimate of between-study variance Tau-squared = 0.0000

Test of RR=1 : z= 1.08 p = 0.280

**Figure IV. 6. g: Dropout due to inefficacy - Risperidone versus Ziprasidone**

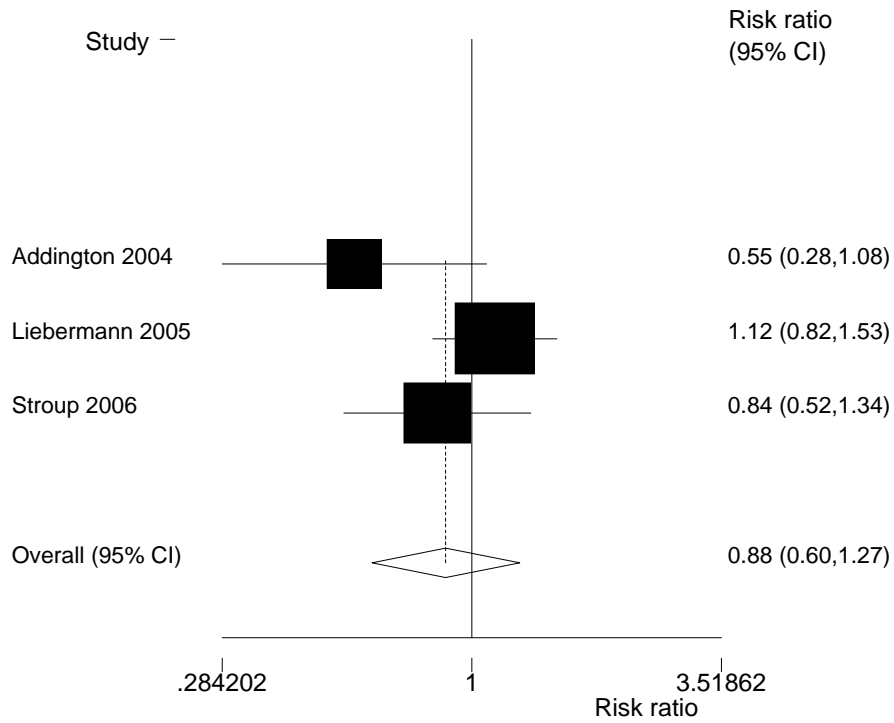

N=1029

Heterogeneity chi-squared = 3.92 (d.f. = 2) p = 0.141

Estimate of between-study variance Tau-squared = 0.0534

Test of RR=1 : z= 0.69 p = 0.489

**Figure IV. 7. a: Dropout due to inefficacy - Sertindole versus Risperidone**

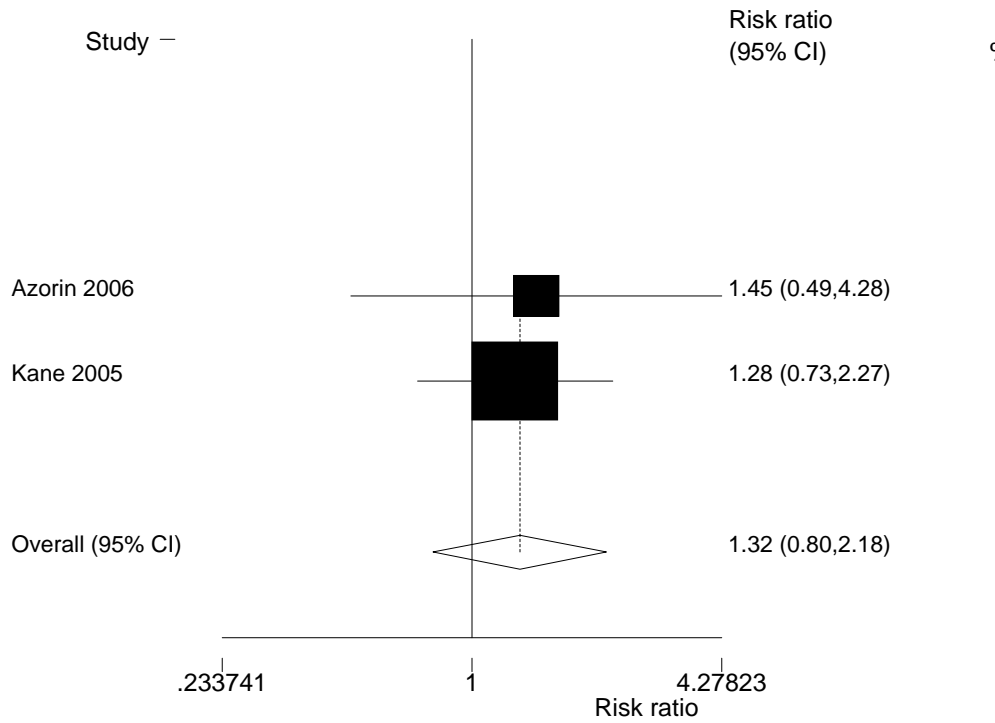

N=508

Heterogeneity chi-squared = 0.04 (d.f. = 1) p = 0.843

Estimate of between-study variance Tau-squared = 0.0000

Test of RR=1 : z= 1.08 p = 0.280



**Figure IV. 8. a: Dropout due to inefficacy – Ziprasidone versus Amisulpride**

| Study         | RR   | [95% Conf. Interval] | % Weight |
|---------------|------|----------------------|----------|
| Olie 2006     | 4.73 | 1.06 20.98           | 100      |
| M-H pooled RR | 4.73 | 1.06 20.98           | 100      |

N=123

Test of RR=1 : z= 2.04 p = 0.04

**Figure IV. 8. b: Dropout due to inefficacy - Ziprasidone versus Clozapine**

|                |         |                 |     |
|----------------|---------|-----------------|-----|
| Sacchetti 2006 | 1.52055 | .261671 8.83578 | 100 |
| M-H pooled RR  | 1.52055 | .261671 8.83578 |     |

N=147

Test of RR=1 : z= 0.47 p = 0.641

**Figure IV. 8. c: Dropout due to inefficacy - Ziprasidone versus Olanzapine**

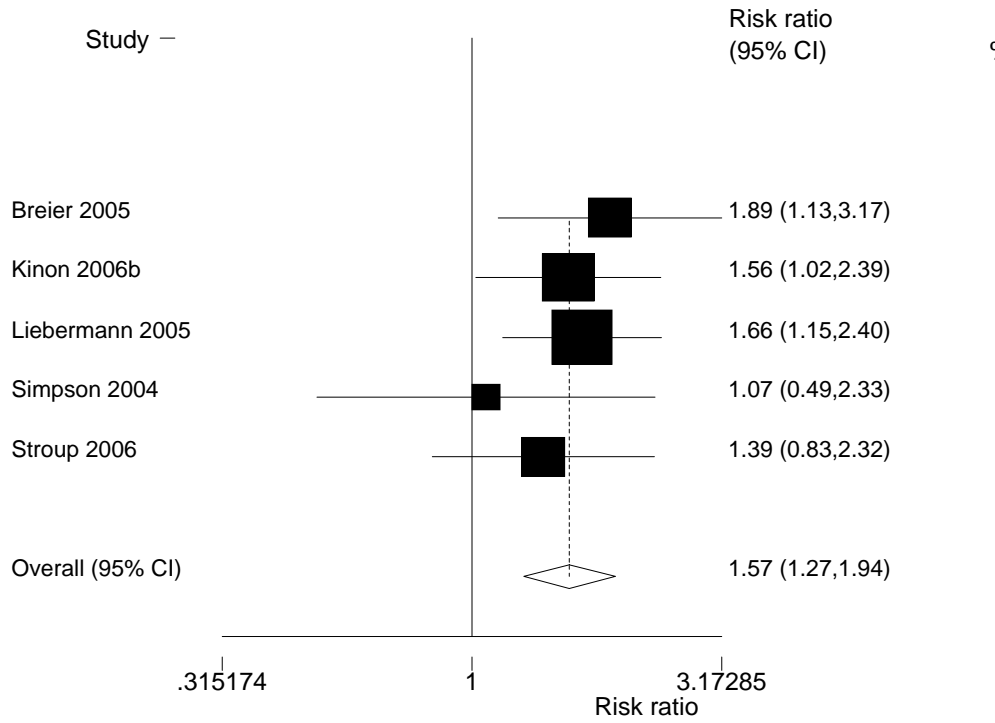

N=1937  
Heterogeneity chi-squared = 1.75 (d.f. = 4) p = 0.782  
Estimate of between-study variance Tau-squared = 0.0000  
Test of RR=1 : z= 4.15 p = 0.000

**Figure IV. 8. d: Dropout due to inefficacy - Ziprasidone versus Quetiapine**

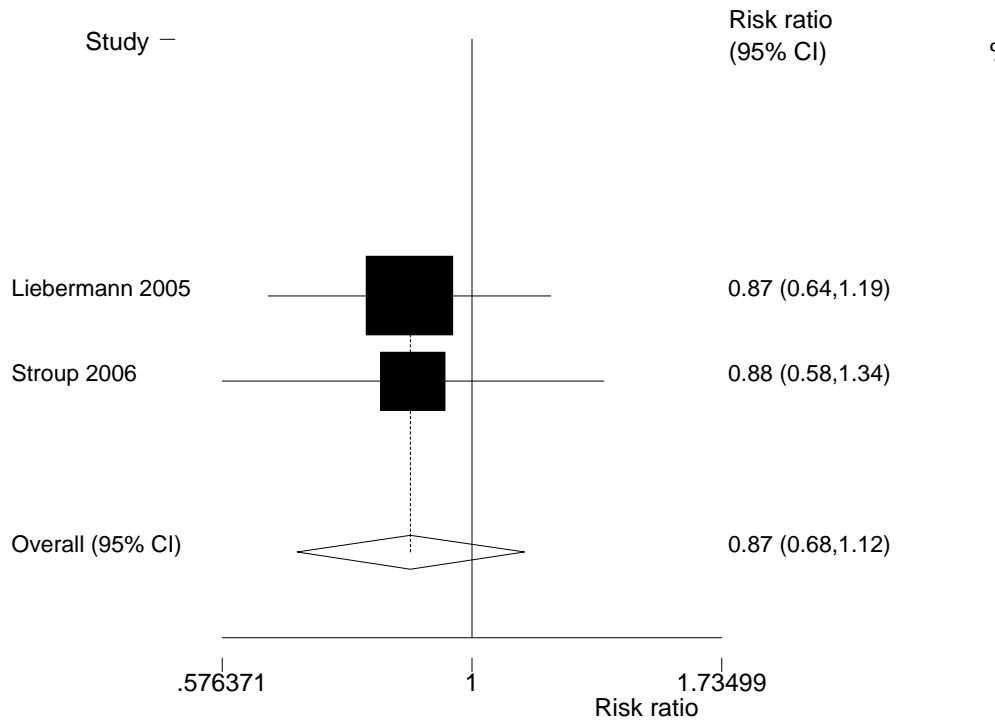

N=722

Heterogeneity chi-squared = 0.00 (d.f. = 1) p = 0.977

Estimate of between-study variance Tau-squared = 0.0000

Test of RR=1 : z= 1.06 p = 0.290

**Figure IV. 8. e: Dropout due to inefficacy - Ziprasidone versus Risperidone**

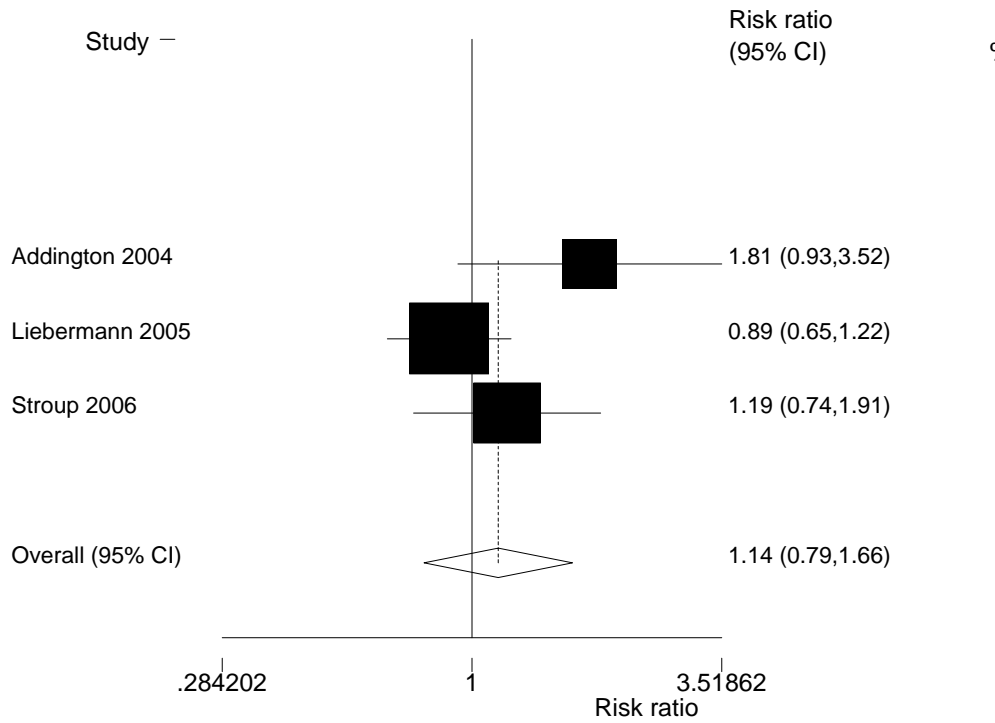

N=1029

Heterogeneity chi-squared = 3.92 (d.f. = 2) p = 0.141

Estimate of between-study variance Tau-squared = 0.0534

Test of RR=1 : z= 0.69 p = 0.489

**Figure V.a to V.i: Publication bias assessed by funnel plots, fail-safe estimates and Egger's tests:**

Note that comparisons with less than three published studies could not be assessed by these methods.

Results are shown only once, for example amisulpride versus olanzapine, but not again olanzapine versus amisulpride

**Figure V.a: Amisulpride versus olanzapine**

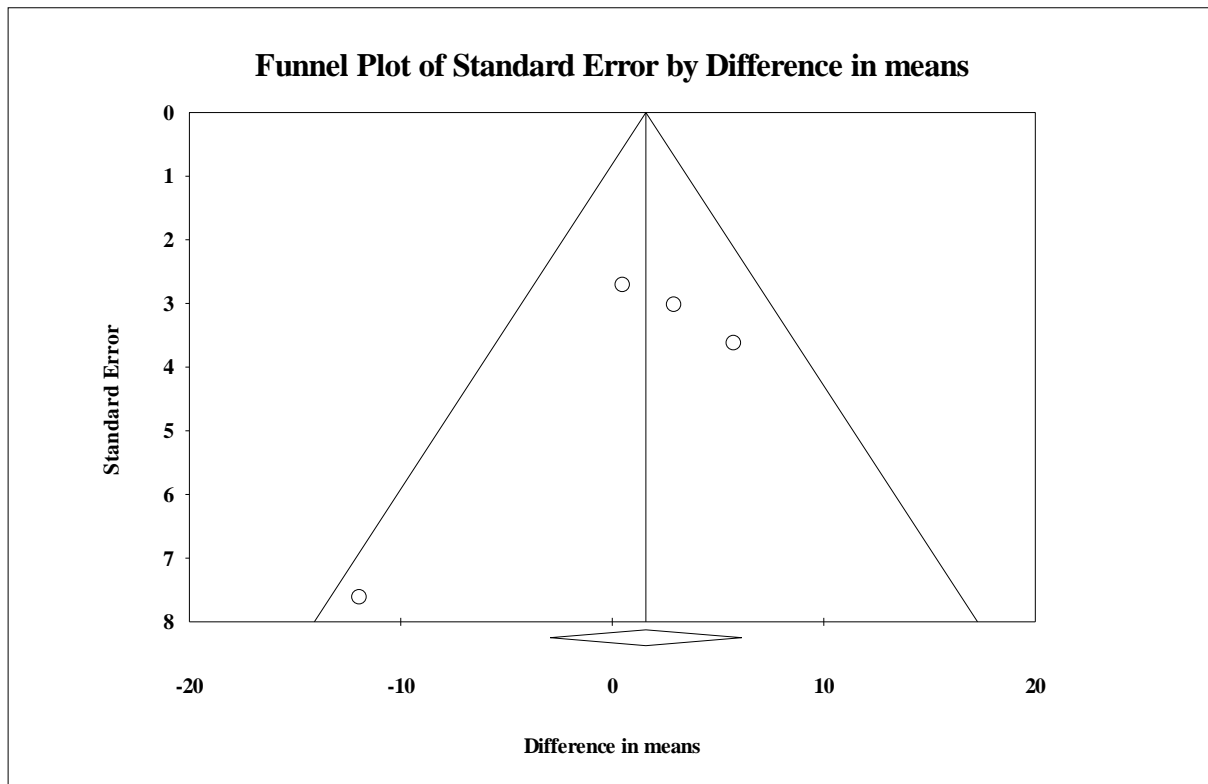

**Fail-safe calculation:** does not apply, because the difference was not statistically significant.

**Egger's regression intercept**

|                            |         |
|----------------------------|---------|
| Intercept                  | -2,225  |
| Standard error             | 1,946   |
| 95% lower limit (2-tailed) | -10,600 |
| 95% upper limit (2-tailed) | 6,149   |
| t-value                    | 1,143   |
| df                         | 2,000   |
| P-value (1-tailed)         | 0,186   |
| P-value (2-tailed)         | 0,371   |

**Figure V.b: Clozapine versus olanzapine**

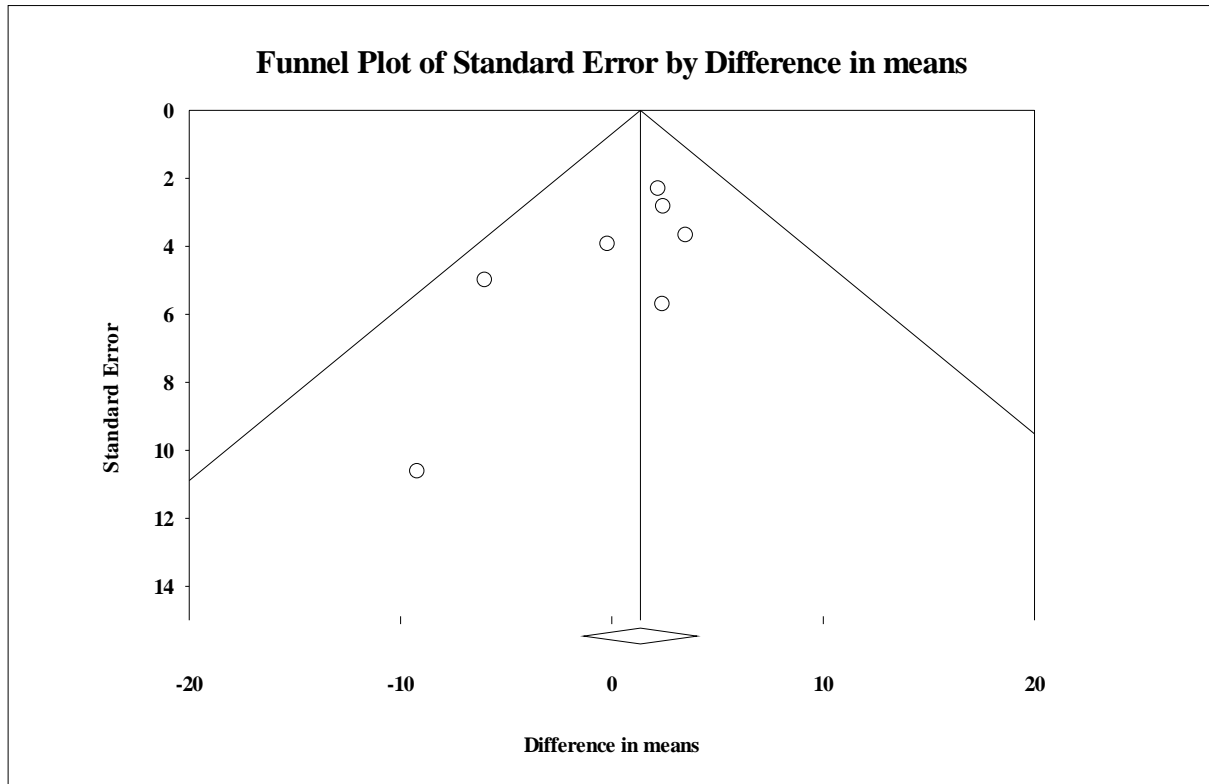

**Fail-safe calculation:** does not apply, because the difference was not statistically significant.

**Egger's regression intercept**

|                            |        |
|----------------------------|--------|
| Intercept                  | -1.312 |
| Standard error             | 0.661  |
| 95% lower limit (2-tailed) | -3.012 |
| 95% upper limit (2-tailed) | 0.387  |
| t-value                    | 1.985  |
| df                         | 5.000  |
| P-value (1-tailed)         | 0.052  |
| P-value (2-tailed)         | 0.104  |

**Figure V.c: Clozapine versus quetiapine**

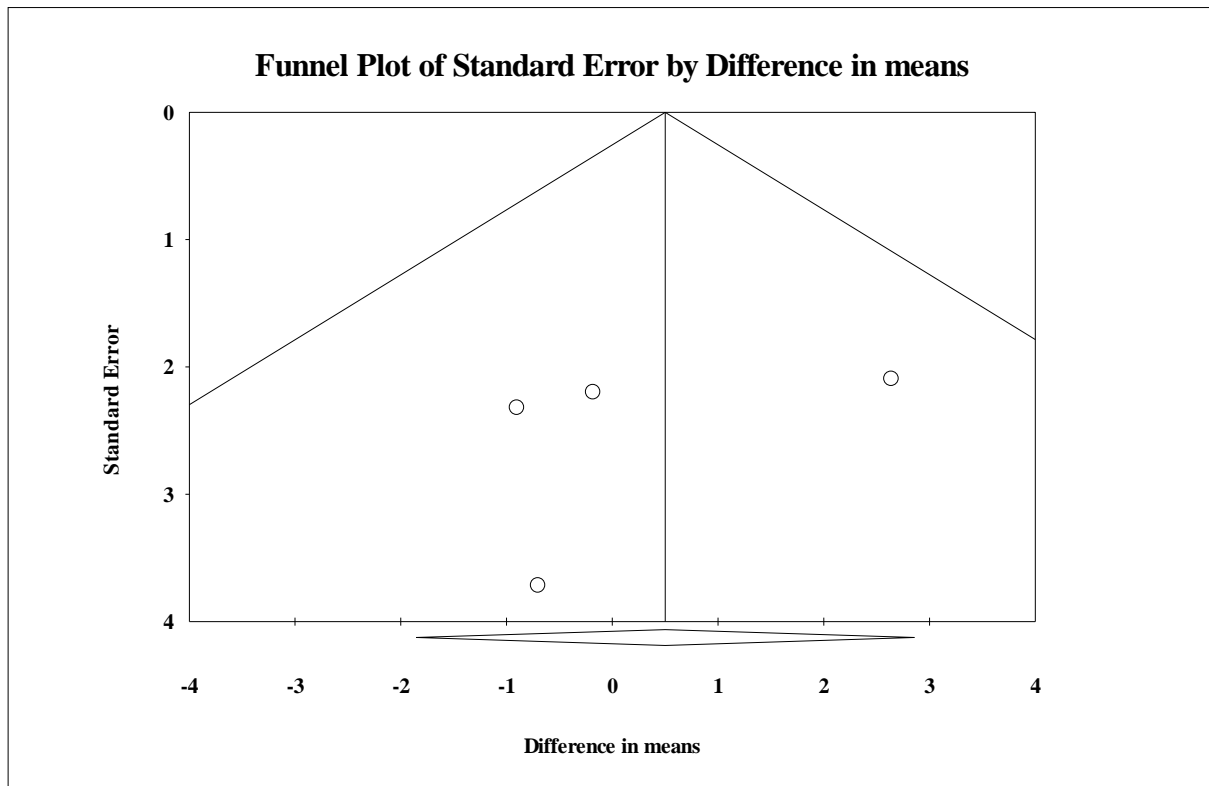

**Fail-safe calculation:** does not apply, because the difference was not statistically significant.

**Egger's regression intercept**

|                            |         |
|----------------------------|---------|
| Intercept                  | -1,385  |
| Standard error             | 2,056   |
| 95% lower limit (2-tailed) | -10,232 |
| 95% upper limit (2-tailed) | 7,462   |
| t-value                    | 0,674   |
| df                         | 2,000   |
| P-value (1-tailed)         | 0,285   |
| P-value (2-tailed)         | 0,570   |

**Figure V.d: Clozapine versus risperidone**

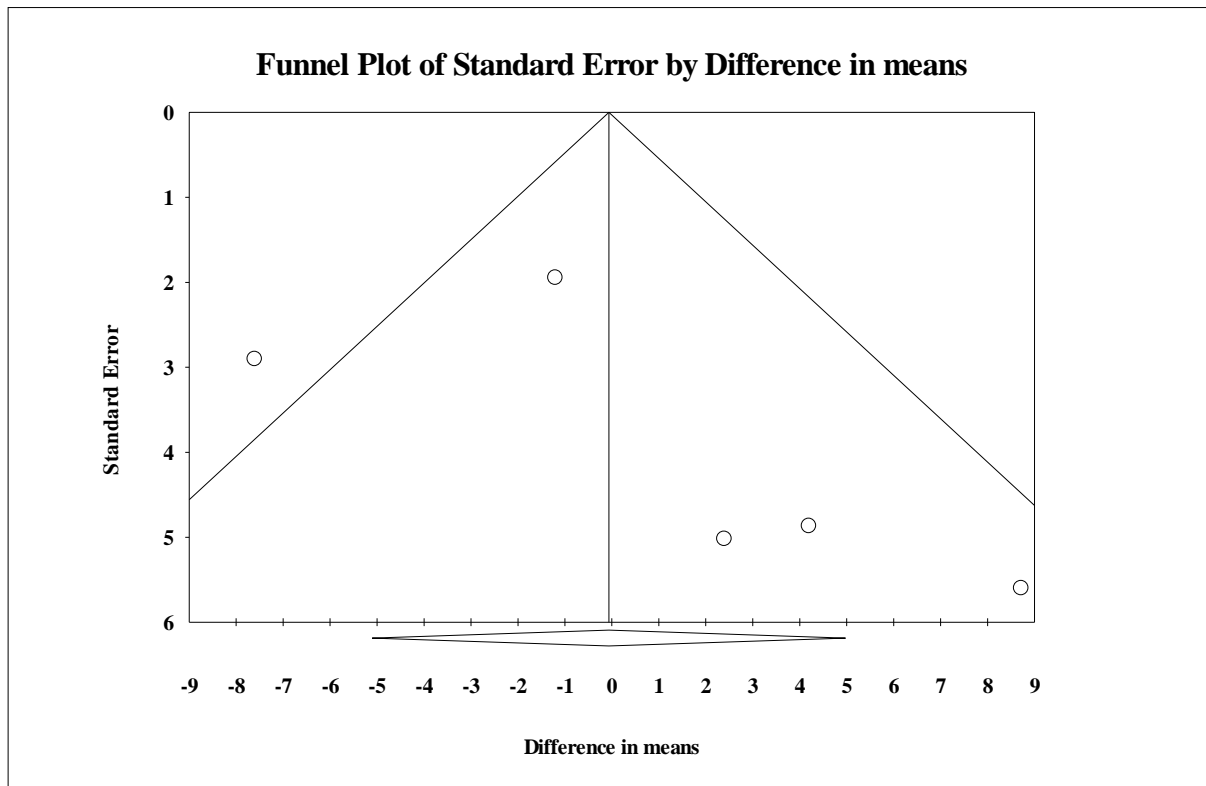

**Fail-safe calculation:** does not apply, because the difference was not statistically significant.

**Egger's regression intercept**

|                            |        |
|----------------------------|--------|
| Intercept                  | 1,968  |
| Standard error             | 1,641  |
| 95% lower limit (2-tailed) | -3,253 |
| 95% upper limit (2-tailed) | 7,189  |
| t-value                    | 1,200  |
| df                         | 3,000  |
| P-value (1-tailed)         | 0,158  |
| P-value (2-tailed)         | 0,316  |



**Figure V.e: Olanzapine versus quetiapine**

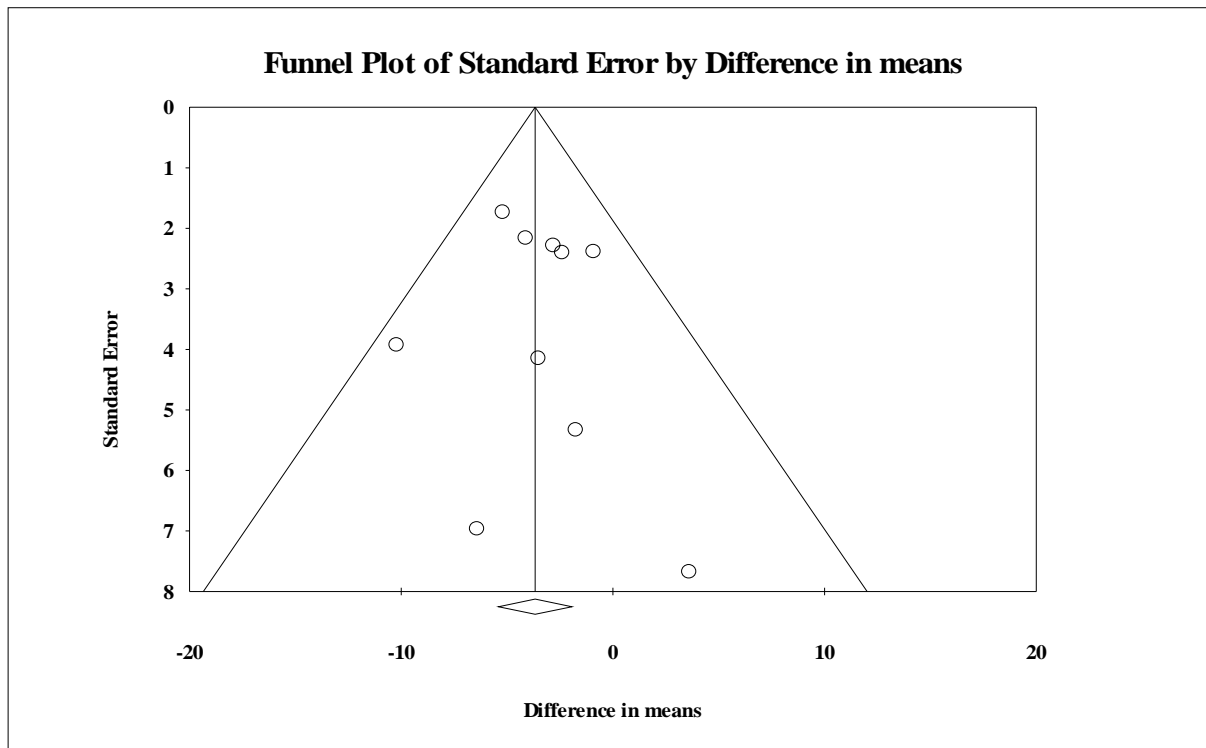

**Classic fail-safe N**

|                                                               |        |
|---------------------------------------------------------------|--------|
| Z-value for observed studies                                  | -3,694 |
| P-value for observed studies                                  | 0,000  |
| Alpha                                                         | 0,050  |
| Tails                                                         | 2,000  |
| Z for alpha                                                   | 1,960  |
| Number of observed studies                                    | 10,000 |
| Number of missing studies that would bring p-value to > alpha | 26,000 |

### **Egger's regression intercept**

|                            |        |
|----------------------------|--------|
| Intercept                  | 0,178  |
| Standard error             | 0,698  |
| 95% lower limit (2-tailed) | -1,431 |
| 95% upper limit (2-tailed) | 1,787  |
| t-value                    | 0,255  |
| df                         | 8,000  |
| P-value (1-tailed)         | 0,402  |
| P-value (2-tailed)         | 0,805  |

**Figure V.f: Olanzapine versus risperidone**

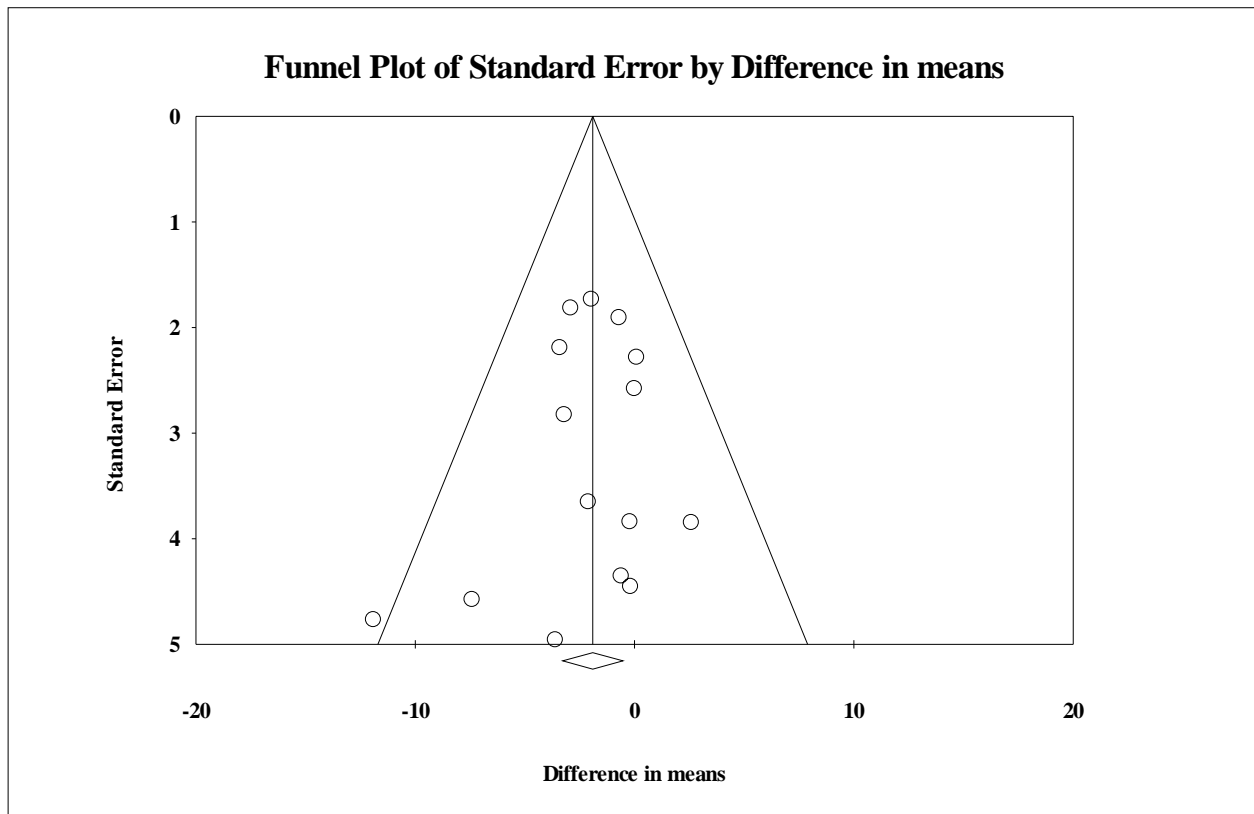

**Classic fail-safe N**

|                                                               |        |
|---------------------------------------------------------------|--------|
| Z-value for observed studies                                  | -2,763 |
| P-value for observed studies                                  | 0,006  |
| Alpha                                                         | 0,050  |
| Tails                                                         | 2,000  |
| Z for alpha                                                   | 1,960  |
| Number of observed studies                                    | 15,000 |
| Number of missing studies that would bring p-value to > alpha | 15,000 |

### **Egger's regression intercept**

|                            |        |
|----------------------------|--------|
| Intercept                  | -0,459 |
| Standard error             | 0,643  |
| 95% lower limit (2-tailed) | -1,850 |
| 95% upper limit (2-tailed) | 0,931  |
| t-value                    | 0,714  |
| df                         | 13,000 |
| P-value (1-tailed)         | 0,244  |
| P-value (2-tailed)         | 0,488  |



### **Egger's regression intercept**

|                            |        |
|----------------------------|--------|
| Intercept                  | 0,313  |
| Standard error             | 0,897  |
| 95% lower limit (2-tailed) | -3,547 |
| 95% upper limit (2-tailed) | 4,173  |
| t-value                    | 0,349  |
| df                         | 2,000  |
| P-value (1-tailed)         | 0,380  |
| P-value (2-tailed)         | 0,760  |

**Figure V.h: Quetiapine versus risperidone**

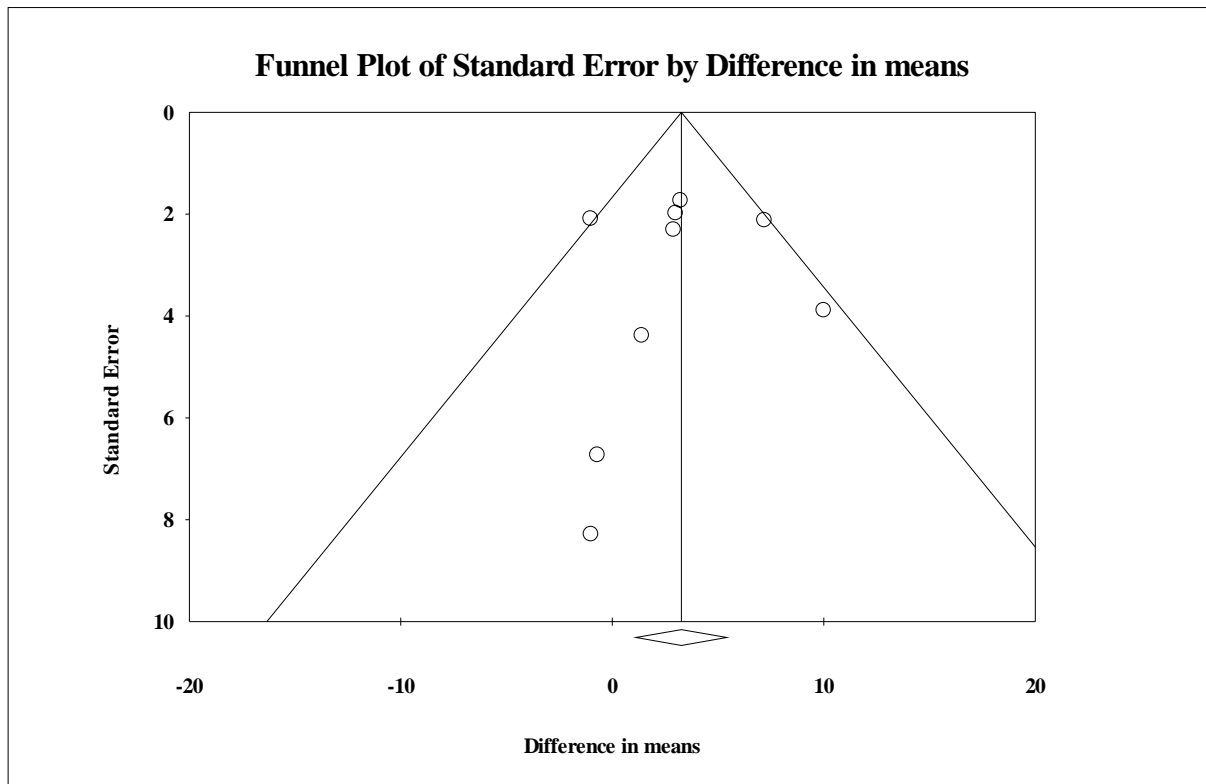

**Classic fail-safe N**

|                                                               |        |
|---------------------------------------------------------------|--------|
| Z-value for observed studies                                  | 3,403  |
| P-value for observed studies                                  | 0,001  |
| Alpha                                                         | 0,050  |
| Tails                                                         | 2,000  |
| Z for alpha                                                   | 1,960  |
| Number of observed studies                                    | 9,000  |
| Number of missing studies that would bring p-value to > alpha | 19,000 |

### **Egger's regression intercept**

|                            |        |
|----------------------------|--------|
| Intercept                  | -0,118 |
| Standard error             | 1,046  |
| 95% lower limit (2-tailed) | -2,591 |
| 95% upper limit (2-tailed) | 2,356  |
| t-value                    | 0,113  |
| df                         | 7,000  |
| P-value (1-tailed)         | 0,457  |
| P-value (2-tailed)         | 0,913  |



**Figure V.i: Risperidone versus ziprasidone**

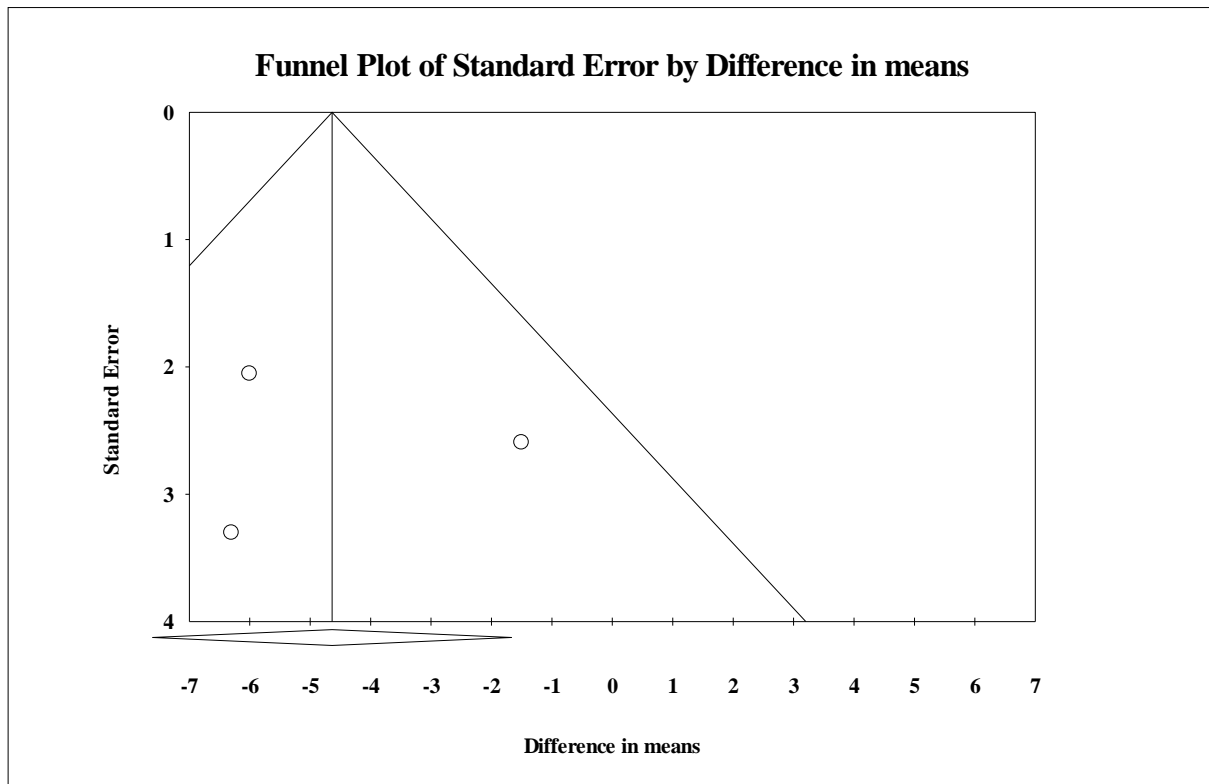

**Classic fail-safe N**

|                                                               |        |
|---------------------------------------------------------------|--------|
| Z-value for observed studies                                  | -3,123 |
| P-value for observed studies                                  | 0,002  |
| Alpha                                                         | 0,050  |
| Tails                                                         | 2,000  |
| Z for alpha                                                   | 1,960  |
| Number of observed studies                                    | 3,000  |
| Number of missing studies that would bring p-value to > alpha | 5,000  |

## Egger's regression intercept

|                            |         |
|----------------------------|---------|
| Intercept                  | 0,613   |
| Standard error             | 4,449   |
| 95% lower limit (2-tailed) | -55,918 |
| 95% upper limit (2-tailed) | 57,143  |
| t-value                    | 0,138   |
| df                         | 1,000   |
| P-value (1-tailed)         | 0,456   |
| P-value (2-tailed)         | 0,913   |

## References:

1. Higgins JPT, Green S: Cochrane Handbook for Systematic Reviews of Interventions 4.2.5 in In: The Cochrane Library Chichester, UK, Wiley and Sons, 2005
2. Egger M, Davey Smith G: Systematic reviews in health care: meta-analysis in context, 2 ed. London, BMJ books, 2001
3. Cooper H, Hedges LV: The handbook of research synthesis New York, Russell Sage Foundation, 1994
4. Adams CE, Coutinho E, Davis JM, Duggan L, Lee C, Leucht S, Tharyan P: Cochrane Schizophrenia Group in The Cochrane Library Chichester, UK, John Wiley & Sons Ltd, 2006
5. Schulz KF, Chalmers I, Hayes RJ, Altman DG: Empirical evidence of bias: dimensions of methodological quality associated with estimates of treatment effects in controlled trials. JAMA 1995; 273:408-412
6. Jadad A, Moore A, Carroll D, Jenkinson C, Reynolds DJM, Gavanagh DJ, McQuay HJ: Assessing the quality of reports of randomized clinical trials: Is blinding necessary? Controlled Clin Trials 1996; 17:1-12
7. Cohen J: Statistical power analysis for the behavioral sciences New York, Academic Press, 1969
8. Egger M, Davey SG, Schneider M, Minder C: Bias in meta-analysis detected by a simple, graphical test. BMJ 1997; 315:629-634
9. Orwin RG: A fail-safe N for effect size in meta-analysis. J Ed Stat 1983; 8:157-159
10. Heres S, Davis J, Maino K, Jetzinger E, Kissling W, Leucht S: Why olanzapine beats risperidone, risperidone beats quetiapine, and quetiapine beats olanzapine: An exploratory analysis of head-to-head comparison studies of second-generation antipsychotics. Am J Psychiatry 2006; 163:185-194
11. Bristol-Myers-Squibb: Study CN138003. Clinical Study Report 2005;
12. Kane JM, Potkin SG, Daniel DG, Buckley P: Efficacy and safety of sertindole and risperidone in treatment resistant patients with schizophrenia. Presented at the 20th International Congress on Schizophrenia Research, Savannah, Georgia, April 2-6, 2005 2005;
13. Volavka J, Czobor P, Sheitman B, Lindenmayer JP, Citrome L, McEvoy JP, Cooper TB, Chakos M, Lieberman JA: Clozapine, olanzapine, risperidone, and haloperidol in the treatment of patients with chronic schizophrenia and schizoaffective disorder. Am J Psychiatry 2002; 159:255-262
14. Perneger TV: What's wrong with Bonferroni adjustments. BMJ 1998; 316:1236-1238
15. Davis JM, Chen N, Glick ID: A meta-analysis of the efficacy of second-generation antipsychotics. Arch Gen Psychiatry 2003; 60:553-564

16. Moher D, Cook DJ, Eastwood S, Olkin I, Rennie D, Stroup DF: Improving the quality of reports of meta-analyses of randomised controlled trials: the QUOROM statement. *Quality of Reporting of Meta-analyses*. *Lancet* 1999; 354:1896-1900
17. Lecrubier Y, Quintin P, Bouhassira M, Perrin E, Lancrenon S: The treatment of negative symptoms and deficit states of chronic schizophrenia: olanzapine compared to amisulpride and placebo in a 6-month double-blind controlled clinical trial. *Acta Psychiatr Scand* 2006; 114:319-327
18. Mortimer A, Martin S, Loo H, Peuskens J: A double-blind, randomized comparative trial of amisulpride versus olanzapine for 6 months in the treatment of schizophrenia. *Int Clin Psychopharmacol* 2004; 19:63-69
19. Vanelle JM, Douki S: A double-blind randomised comparative trial of amisulpride versus olanzapine for 2 months in the treatment of subjects with schizophrenia and comorbid depression. *Eur Psychiatry* 2006; 21:523-530
20. Wagner M, Quednow BB, Westheide J, Schlaepfer TE, Maier W, Kuhn KU: Cognitive improvement in schizophrenic patients does not require a serotonergic mechanism: randomized controlled trial of olanzapine vs amisulpride. *Neuropsychopharmacology* 2005; 30:381-390
21. Hwang TJ, Lee SM, Sun HJ, Lin HN, Tsai SJ, Lee YC, Chen YS: Amisulpride versus risperidone in the treatment of schizophrenic patients: a double-blind pilot study in Taiwan. *J Formos Med Assoc* 2003; 102:30-36
22. Möller HJ, Riedel M, Eich FX: A randomised double-blind trial comparing treatment with amisulpride or risperidone for six weeks in elderly patients with schizophrenia. *Eur Neuropsychopharmacol* 2005; 15 (suppl.3):S511
23. Peuskens J, Bech P, Möller HJ, Bale R, Fleurot O, Rein W, Amisulpride study group: Amisulpride vs. risperidone in the treatment of acute exacerbations of schizophrenia. *Psychiatry Res* 1999; 88:107-117
24. Sechter D, Peuskens J, Fleurot O, Rein W, Lecrubier Y: Amisulpride vs. risperidone in chronic schizophrenia: Results of a 6-month double-blind study. *Neuropsychopharmacology* 2002; 27:1071-1081
25. Olie JP, Spina E, Murray S, Yang R: Ziprasidone and amisulpride effectively treat negative symptoms of schizophrenia: results of a 12-week, double-blind study. *Int Clin Psychopharmacol* 2006; 21:143-151
26. McQuade RD, Stock E, Marcus R, Jody D, Gharbia NA, Vanveggel S, Archibald D, Carson WH: A comparison of weight change during treatment with olanzapine or aripiprazole: results from a randomized, double-blind study. *J Clin Psychiatry* 2004; 65 Suppl 18:47-56
27. Chan HY, Lin WW, Lin SK, Hwang TJ, Su TP, Chiang SC, Hwu HG: Efficacy and safety of aripiprazole in the acute treatment of schizophrenia in Chinese patients with risperidone as an active control: a randomized trial. *J Clin Psychiatry* 2007; 68:29-36
28. Potkin SG, Saha AR, Kujawa MJ, Carson WH, Ali M, Stock E, Stringfellow J, Ingenito G, Marder SR: Aripiprazole, an antipsychotic with a novel mechanism of action, and risperidone vs placebo in patients with schizophrenia and schizoaffective disorder. *Arch Gen Psychiatry* 2003; 60:681-690
29. Bitter I, Dossenbach MR, Brook S, Feldman PD, Metcalfe S, Gagiano CA, Furedi J, Bartko G, Janka Z, Banki CM, Kovacs G, Breier A: Olanzapine versus clozapine in treatment-resistant or treatment-intolerant schizophrenia. *Prog Neuropsychopharmacol Biol Psychiatry* 2004; 28:173-180
30. Conley RR, Kelly DL, Richardson CM, Tamminga CA, Carpenter WT, Jr.: The efficacy of high-dose olanzapine versus clozapine in treatment-resistant schizophrenia: a double-blind crossover study. *J Clin Psychopharmacol* 2003; 23:668-671

31. Krakowski MI, Czobor P, Citrome L, Bark N, Cooper TB: Atypical antipsychotic agents in the treatment of violent patients with schizophrenia and schizoaffective disorder. *Arch Gen Psychiatry* 2006; 63:622-629
32. Meltzer HY, Alphas L, Green AI, Altamura AC, Anand R, Bertoldi A, Bourgeois M, Chouinard G, Islam MZ, Kane J, Krishnan R, Lindenmayer JP, Potkin S: Clozapine treatment for suicidality in schizophrenia: International Suicide Prevention Trial (InterSePT). *Arch Gen Psychiatry* 2003; 60:82-91
33. Moresco RM, Cavallaro R, Messa C, Bravi D, Gobbo C, Galli L, Lucignani G, Colombo C, Rizzo G, Velona I, Smeraldi E, Fazio F: Cerebral D2 and 5-HT2 receptor occupancy in Schizophrenic patients treated with olanzapine or clozapine. *J Psychopharmacol* 2004; 18:355-365
34. Naber D, Riedel M, Klimke A, Vorbach EU, Lambert M, Kuhn KU, Bender S, Bandelow B, Lemmer W, Moritz S, Dittmann RW: Randomized double blind comparison of olanzapine vs. clozapine on subjective well-being and clinical outcome in patients with schizophrenia. *Acta Psychiatr Scand* 2005; 111:106-115
35. Shaw P, Sporn A, Gogtay N, Overman GP, Greenstein D, Gochman P, Tossell JW, Lenane M, Rapoport JL: Childhood-onset schizophrenia: A double-blind, randomized clozapine-olanzapine comparison. *Arch Gen Psychiatry* 2006; 63:721-730
36. Tollefson GD, Birkett MA, Kiesler GM, Wood AJ: Double-blind comparison of olanzapine versus clozapine in schizophrenic patients clinically eligible for treatment with clozapine. *Biol Psychiatry* 2001; 49:52-63
37. Atmaca M, Kuloglu M, Tezcan E, Ustundag B: Serum leptin and triglyceride levels in patients on treatment with atypical antipsychotics. *J Clin Psychiatry* 2003; 64:598-604
38. Wang C-H, Feng GY, Wang L: A double-blind randomized controlled study of olanzapine and clozapine on treatment of schizophrenia. *Shanghai Arch Psychiatry* 2002; 14:143-145
39. Kumra S, Kranzler H, Gerbino-Rosen G, Kester HM, Dethomas C, Kafantaris V, Correll CU, Kane JM: Clozapine and "High-Dose" Olanzapine in Refractory Early-Onset Schizophrenia: A 12-Week Randomized and Double-Blind Comparison. *Biol Psychiatry* 2007; July 23 (epub ahead of print):
40. Li CH: A study of quetiapine and clozapine in the treatment of schizophrenia. *Chin J Nerv Ment Dis* 2003; 29:306-307
41. Li Y, Feng Y: A double-blind comparing study between the effects of quetiapine and clozapine on the life quality of the patients with schizophrenia. *Med J Chin People's Health* 2005; 17:262-264
42. Li Y, Wang C-H, Zhang DH, Wang LH, Zhao Z: A study of quetiapine and clozapine in treatment of first episode schizophrenia. *Chin J Nerv Ment Dis* 2002; 28:219-220
43. Liu Y, Xu M, Chen X: A controlled study of quetiapine and clozapine in the treatment of schizophrenia with predominantly negative symptoms. *Shandong Arch Psychiatry* 2004; 17:6-8
44. Azorin JM, Spiegel R, Remington G, Vanelle JM, Pere JJ, Giguere M, Bourdeix I: A double-blind comparative study of clozapine and risperidone in the management of severe chronic schizophrenia. *Am J Psychiatry* 2001; 158:1305-1313
45. Bondolfi G, Dufour H, Patris M, May JP, Billeter U, Eap CB, Baumann P: Risperidone versus clozapine in treatment-resistant chronic schizophrenia: a randomized double-blind study. The Risperidone Study Group. *Am J Psychiatry* 1998; 155:499-504
46. Breier AF, Malhotra AK, Su TP, Pinals DA, Elman I, Adler CM, Lafargue RT, Clifton A, Pickar D: Clozapine and risperidone in chronic schizophrenia: effects on symptoms, parkinsonian side effects, and neuroendocrine response. *Am J Psychiatry* 1999; 156:294-298
47. Ren Q, Liu S, Ma X: A double blind study of clozapine and risperidone for the quality of life in schizophrenia. *Nerv Dis Ment Hygiene* 2001; 1:40

48. Zhou Z, Shu Z, Yu Y: A controlled study of risperidone and clozapine in the treatment of the negative symptoms of schizophrenia. *Aerospace Med* 2000; 11:69-71
49. Heinrich K, Klieser E, Lehmann E, Kinzler E, Hruschka H: Risperidone versus clozapine in the treatment of schizophrenic patients with acute symptoms: a double blind, randomized trial. *Prog Neuropsychopharmacol Biol Psychiatry* 1994; 18:129-137
50. McGurk SR, Carter C, Goldman R, Green MF, Marder SR, Xie H, Schooler NR, Kane JM: The effects of clozapine and risperidone on spatial working memory in schizophrenia. *Am J Psychiatry* 2005; 162:1013-1016
51. Wahlbeck K, Cheine M, Tuisku K, Ahokas A, Joffe G, Rimon R: Risperidone versus clozapine in treatment-resistant schizophrenia: a randomized pilot study. *Prog Neuropsychopharmacol Biol Psychiatry* 2000; 24:911-922
52. Daniel DG, Goldberg TE, Weinberger DR, Kleinman JE, Pickar D, Lubick LJ, Williams TS: Different side effect profiles of risperidone and clozapine in 20 outpatients with schizophrenia or schizoaffective disorder: a pilot study. *Am J Psychiatry* 1996; 153:417-419
53. Sacchetti E, Galluzzo A, Valsecchi P, Romeo F, Gorini B, Warrington L: Comparative efficacy and safety of ziprasidone and clozapine in treatment refractory schizophrenic patients: Results of a randomized, double-blind, 18-week trial. *Schizophr Res* 2006; 81:64-65
54. Lin CC, Bai YM, Chen JY, Wang YC, Liou YJ, Chao CH, Lai IC, Tsai KY, Chiu HJ: Switching from clozapine to zotepine in schizophrenic patients. A randomised single blind controlled study. *Eur Neuropsychopharmacol* 2003; 13:318
55. Meyer-Lindenberg A, Gruppe H, Bauer U, Lis S, Krieger S, Gallhofer B: Improvement of cognitive function in schizophrenic patients receiving clozapine or zotepine: results from a double-blind study. *Pharmacopsychiatry* 1997; 30:35-42
56. Kinon BJ, Noordsy DL, Liu-Seifert H, Gulliver AH, Ascher-Svanum H, Kollack-Walker S: Randomized, double-blind 6-month comparison of olanzapine and quetiapine in patients with schizophrenia or schizoaffective disorder with prominent negative symptoms and poor functioning. *J Clin Psychopharmacol* 2006; 26:453-461
57. Riedel M, Muller N, Spellmann I, Engel RR, Musil R, Valdevit R, Dehning S, Douhet A, Cerovecki A, Strassnig M, Moller HJ: Efficacy of olanzapine versus quetiapine on cognitive dysfunctions in patients with an acute episode of schizophrenia. *Eur Arch Psychiatry Clin Neurosci* 2007;
58. Lieberman JA, Stroup TS, McEvoy JP, Swartz MS, Rosenheck RA, Perkins DO, Keefe RSE, Davis SM, Davis CE, Lebowitz BD, Severe J, Hsiao JK: Effectiveness of antipsychotic drugs in patients with chronic schizophrenia. *N Engl J Med* 2005; 353:1209-1223
59. Stroup TS, Lieberman JA, McEvoy JP, Swartz MS, Davis SM, Rosenheck RA, Perkins DO, Keefe RSE, Davis CE, Severe J, Hsiao JK: Effectiveness of olanzapine, quetiapine, risperidone, and ziprasidone in patients with chronic schizophrenia following discontinuation of a previous atypical antipsychotic. *Am J Psychiatry* 2006; 163:611-622
60. Sirota P, Pannet I, Koren A, Tchernichovsky E: Quetiapine versus olanzapine for the treatment of negative symptoms in patients with schizophrenia. *Hum Psychopharmacol* 2006; 21:227-234
61. Svestka J, Synek O, Zourkova A: A double-blind comparison of olanzapine and quetiapine in treatment of acute exacerbations of schizophrenic or schizoaffective disorders. *Eur Neuropsychopharmacol* 2003; 13:S292
62. Ozguven HD, Oner O, Baskak B, Oner P, Atbasoglu EC: The metabolic and clinical effects of olanzapine and quetiapine preliminary findings from a randomized single blind trials in patients with schizophrenia. *Schizophr Res* 2004; 67:190-191
63. McEvoy JP, Lieberman JA, Perkins DO, Hamer RM, Gu H, Lazarus A, Sweitzer D, Olexy C, Weiden P, Strakowski SD: Efficacy and tolerability of olanzapine, quetiapine,

- and risperidone in the treatment of early psychosis: a randomized, double-blind 52-week comparison. *Am J Psychiatry* 2007; 164:1050-1060
64. Mori K, Nagao M, Yamashita H, Morinobu S, Yamawaki S: Effect of switching to atypical antipsychotics on memory in patients with chronic schizophrenia. *Prog Neuropsychopharmacol Biol Psychiatry* 2004; 28:659-665
  65. McEvoy JP, Lieberman JA, Stroup TS, Davis SM, Meltzer HY, Rosenheck RA, Swartz MS, Perkins DO, Keefe RSE, Davis CE, Severe J, Hsiao JK: Effectiveness of clozapine versus olanzapine, quetiapine, and risperidone in patients with chronic schizophrenia who did not respond to prior atypical antipsychotic treatment. *Am J Psychiatry* 2006; 163:600-610
  66. Voruganti LP, Awad AG, Parker G, Forrest C, Usmani Y, Fernando ML, Senthilal S: Cognition, functioning and quality of life in schizophrenia treatment: Results of a one-year randomized controlled trial of olanzapine and quetiapine. *Schizophr Res* 2007; 96:146-155
  67. Sacchetti E, Valsecchi P, Regini C, Galluzzo A, Cacciani P, Agrimi E, Mencacci C: Interim results of a randomised, rater-blinded study comparing quetiapine, olanzapine and risperidone in patients with schizophrenia. *Eur Psychiatry* 2004; 19:172S
  68. Canive JM, Edgar JC, LaNoue MD, Miller GA, Weisend MP, Tuason VB: A magnetoencephalographic examination of the effects of olanzapine and risperidone in patients with schizophrenia. Presented at the 40th annual meeting of the new clinical drug evaluation unit, BocaRaton, Florida, USA, 30 5 -2 6 2000 2000;
  69. Wynn JK, Green MF, Sprock J, Light GA, Widmark C, Reist C, Erhart S, Marder SR, Mintz J, Braff DL: Efficacy of olanzapine and risperidone on prepulse inhibition in schizophrenia patients: a double-blind, randomized controlled trial. *Schizophr Res* 2007; epub ahead of print:
  70. Conley RR, Mahmoud R: A randomized double-blind study of risperidone and olanzapine in the treatment of schizophrenia or schizoaffective disorder. *Am J Psychiatry* 2001; 158:765-774
  71. Dollfus S, Olivier W, Chabot B, Deal C, Perrin E: Olanzapine versus risperidone in the treatment of post-psychotic depression in schizophrenic patients. *Schizophr Res* 2005; 78:157-159
  72. Gureje O, Miles W, Keks N, Grainger D, Lambert T, McGrath J, Tran P, Catts S, Fraser A, Hustig H, Andersen S, Crawford AM: Olanzapine vs risperidone in the management of schizophrenia: a randomized double-blind trial in Australia and New Zealand. *Schizophr Res* 2003; 61:303-314
  73. Jeste DV, Barak Y, Madhusoodanan S, Grossman F, Gharabawi G: International multisite double-blind trial of the atypical antipsychotics risperidone and olanzapine in 175 elderly patients with chronic schizophrenia. *Am J Geriatr Psychiatry* 2003; 11:638-647
  74. Keefe RSE, Young CA, Rock SL, Purdon S, Gold JM, Breier A: One-year double-blind study of the neurocognitive efficacy of olanzapine, risperidone and haloperidol in schizophrenia. *Schizophr Res* 2006; 81:1-15
  75. Purdon S, Jones BDW, Stip E, Labelle A, Addington D, David SR, Breier A, Tollefson G, Canadian collaborative group for research on cognition in schizophrenia.: Neuropsychological change in early phase schizophrenia during 12 months of treatment with olanzapine, risperidone or haloperidol. *Arch Gen Psychiatry* 2000; 57:249-258
  76. Robinson DG, Woerner MG, Napolitano B, Patel RC, Sevy SM, Gunduz-Bruce H, Soto-Perello JM, Mendelowitz A, Khadivi A, Miller R, McCormack J, Lorell BS, Lesser ML, Schooler NR, Kane JM: Randomized comparison of olanzapine versus risperidone for the treatment of first-episode schizophrenia: 4-month outcomes. *Am J Psychiatry* 2006; 163:2096-2102

77. Sikich L, Hamer RM, Bashford RA, Sheitman BB, Lieberman JA: A pilot study of risperidone, olanzapine, and haloperidol in psychotic youth: A double-blind, randomized, 8-week trial. *Neuropsychopharmacology* 2004; 29:133-145
78. Tran PV, Hamilton SH, Kuntz AJ, Potvin JH, Andersen SW, Beasley C, Tollefson GD: Double-blind comparison of olanzapine versus risperidone in the treatment of schizophrenia and other psychotic disorders. *J Clin Psychopharmacol* 1997; 17:407-418
79. van Nimwegen L, de Haan L: Early withdrawal in a double-blind randomized clinical trial with olanzapine and risperidone performed in adolescents with first psychosis. *Psychopathology* 2006; 39:158
80. Wang X, Savage R, Borisov A, Rosenberg J, Woolwine B, Tucker M, May R, Feldman J, Nemeroff CB, Miller AH: Efficacy of risperidone versus olanzapine in patients with schizophrenia previously on chronic conventional antipsychotic therapy: a switch study. *J Psychiatr Res* 2006; 40:669-676
81. Svestka J, Synek O, Zourkova A: Olanzapine versus risperidone in first-episode schizophrenic and schizofrom disorders: A double-blind comparison. *Eur Neuropsychopharmacol* 2003; 13:S291
82. Breier A, Berg PH, Thakore JH, Naber D, Gattaz WF, Cavazzoni P, Walker DJ, Roychowdhury SM, Kane JM: Olanzapine versus ziprasidone: results of a 28-week double-blind study in patients with schizophrenia. *Am J Psychiatry* 2005; 162:1879-1887
83. Kinon BJ, Lipkovich I, Edwards SB, Adams DH, Ascher-Svanum H, Siris SG: A 24-week randomized study of olanzapine versus ziprasidone in the treatment of schizophrenia or schizoaffective disorder in patients with prominent depressive symptoms. *J Clin Psychopharmacol* 2006; 26:157-162
84. Simpson GM, Glick ID, Weiden PJ, Romano SJ, Siu CO: Randomized, controlled, double-blind multicenter comparison of the efficacy and tolerability of ziprasidone and olanzapine in acutely ill inpatients with schizophrenia or schizoaffective disorder. *Am J Psychiatry* 2004; 161:1837-1847
85. Svestka J, Synek O, Tomanova J: Olanzapine versus ziprasidone in the treatment of acute exacerbation of schizophrenic and schizoaffective disorders. *Psychiatrie (Prague)* 2005; 9 (suppl 1):4
86. Conley RR, Kelly DL, Nelson MW, Richardson CM, Feldman S, Benham R, Steiner P, Khan I, McMullen R, Gale E, Mackowick M, Love RC: Risperidone, quetiapine, and fluphenazine in the treatment of patients with therapy-refractory schizophrenia. *Clin Neuropharmacol* 2005; 28:163-168
87. Potkin SG, Gharabawi GM, Greenspan AJ, Mahmoud R, Kosik-Gonzalez C, Rupnow MFT, Bossie CA, Davidson M, Burtea V, Zhu Y, Trivedi JK: A double-blind comparison of risperidone, quetiapine and placebo in patients with schizophrenia experiencing an acute exacerbation requiring hospitalization. *Schizophr Res* 2006; 85:254-265
88. Riedel M, Muller N, Strassnig M, Spellmann I, Engel RR, Musil R, Dehning S, Douhet A, Schwarz MJ, Moller HJ: Quetiapine has equivalent efficacy and superior tolerability to risperidone in the treatment of schizophrenia with predominantly negative symptoms. *Eur Arch Psychiatry Clin Neurosci* 2005; 255:432-437
89. Zhong KX, Sweitzer DE, Hamer RM, Lieberman JA: Comparison of quetiapine and risperidone in the treatment of schizophrenia: A randomized, double-blind, flexible-dose, 8-week study. *J Clin Psychiatry* 2006; 67:1093-1103
90. Azorin JM, Strub N, Loft H: A double-blind, controlled study of sertindole versus risperidone in the treatment of moderate-to-severe schizophrenia. *Int Clin Psychopharmacol* 2006; 21:49-56
91. Addington DE, Pantelis C, Dineen M, Benattia I, Romano SJ: Efficacy and tolerability of ziprasidone versus risperidone in patients with acute exacerbation of schizophrenia or schizoaffective disorder: an 8-week, double-blind, multicenter trial. *J Clin Psychiatry* 2004; 65:1624-1633
